# Supplementary material
Source: PubMed Central journal article supplement (PMC5889629)
Supplement: pnas.1714131115.sapp.pdf [file pnas.1714131115.sapp.pdf]

## Supplementary Text

### Parameterisation of Compounds.

**Initial parameterisation.** The parameterization of the local anaesthetic drug models were performed with the Force Field Toolkit (FFTK)(1) implemented in VMD(2). FFTK does not support the parameterization of LJ parameters and the Urey-Bradley term, and these parameters were obtained by analogy from the CGenFF program (<https://cgenff.paramchem.org/>)(3, 4).

The potential energy function of the additive CHARMM force field(5) is expressed as

$$\begin{aligned}
 U_{tot} = & \sum_{bonds} K_b(b - b_0)^2 + \sum_{angles} K_\theta(\theta - \theta_0)^2 \\
 & + \sum_{UB} K_{UB}(S - S_0)^2 + \sum_{dihedrals} K_\chi(1 + \cos(n\chi - \delta)) \\
 & + \sum_{impropers} K_{imp}(\Theta - \Theta_0)^2 \\
 & + \sum_{\substack{nonbonded \\ i \neq j}} \left( \epsilon_{ij} \left[ \left( \frac{R_{min}}{r_{ij}} \right)^{12} - 2 \left( \frac{R_{min}}{r_{ij}} \right)^6 \right] + \frac{q_i q_j}{\epsilon_i r_{ij}} \right)
 \end{aligned} \quad (1)$$

$U_{tot}$  is the sum of bonding and non-bonding interaction potentials. The bonding interaction terms involve the bonds, valence angles, a Urey-Bradley term, dihedral angles, and an improper dihedral angles term (the first four terms in Equation 1). The quantity K corresponds to the force constants;  $b_0$ ,  $\theta_0$ ,  $\Phi_0$ , and  $S_0$  are the bond, angle, improper and Urey-Bradley equilibrium terms;  $n$  and  $\delta$  are the dihedral multiplicity and dihedral phase. The non-bonding interactions are represented by the last term in Equation 1, which includes the Lennard-Jones (LJ) interactions and electrostatic interactions.  $\epsilon_{ij}$  is the strength (well depth) of the LJ potential between atoms  $i$  and  $j$ .  $R_{min}$  implicitly depends on  $i$  and  $j$  and is the distance at the minimum of the LJ potential. Finally,  $q_i$  is the partial charge on atom  $i$  and  $\epsilon_i$  is the dielectric constant. Parameters of all compounds are below.

**Octanol-water and cyclohexane-water partitioning.** To validate the drug models, we calculated the octanol-water and cyclohexane-water partitioning coefficients, which were compared with available experimental data. The octanol-water and cyclohexane-water partitioning free energies for neutral drugs were determined using the Bennett Acceptance Ratio (BAR) approach(6), as implemented in GROMACS4.5.4(7). In this approach, the free energy difference between two close states is derived as:

$$\begin{aligned}
 A_1 - A_2 = & -k_B T \ln \frac{\int e^{-\beta U_2(r^N)} dr^N}{\int e^{-\beta U_1(r^N)} dr^N} \\
 = & -k_B T \ln \left( \frac{\int e^{-\beta U_2(r^N)} dr^N}{\int \omega(r^N) e^{-\beta U_1(r^N) - \beta U_2(r^N)} dr^N} \right) \\
 & * \left( \frac{\int \omega(r^N) e^{-\beta U_1(r^N) - \beta U_2(r^N)} dr^N}{\int e^{-\beta U_1(r^N)} dr^N} \right) \\
 = & -k_B T \ln \frac{\langle \omega e^{-\beta U_2} \rangle_1}{\langle \omega e^{-\beta U_1} \rangle_2}
 \end{aligned} \quad (2)$$

where  $k_B$  is the Boltzmann constant,  $T$  is the temperature,  $N$  is the number of atoms, and  $\omega(r^N)$  is an arbitrary weighting

function. The strategy in BAR method is to try to find an optimal  $\omega$  value that minimizes the expected statistical error in the calculated free energy difference. The optimal weighting function has the form,

$$\omega(r^N) \propto (n_1^{-1} e^{-\beta A_1 - \beta U_2(r^N)} + n_2^{-1} e^{-\beta A_2 - \beta U_1(r^N)})^{-1} \quad (3)$$

The variables  $n_1$  and  $n_2$  give the number of trajectory configurations used in the free energy average for states 1 and 2. If we assume that these are the same, we have that,

$$\omega(r^N) \propto (e^{-\beta A_1 - \beta U_2(r^N)} + e^{-\beta A_2 - \beta U_1(r^N)})^{-1} \quad (4)$$

Finally, the following equation is derived:

$$\Delta A_{1 \rightarrow 2} = k_B T \ln \frac{\langle \frac{1}{1 + e^{-\beta \Delta U + \beta \Delta A_{1 \rightarrow 2}}} \rangle_1}{\langle \frac{1}{1 + e^{-\beta \Delta U + \beta \Delta A_{1 \rightarrow 2}}} \rangle_2} \quad (5)$$

Equation (5) can be solved by iterating until the free energy difference converges. However, the free energy value cannot converge if the two states are separated in the configurational space. In practice, many intermediate states represented by  $\lambda$  are needed to bridge the two-end states. And hence, the free energy difference between state A and B can be expressed as:

$$\Delta A_{1 \rightarrow 2} = \sum \Delta A_{\lambda_i \rightarrow \lambda_{i+1}} \quad (6)$$

The resulting free energy difference can be used to calculate the partitioning coefficient,  $P$ , using the relation:

$$\text{Log}P = \frac{\Delta A_{1 \rightarrow 2}}{2.303RT} \quad (7)$$

where  $R$  is the universal gas constant and  $T$  is the simulation temperature.

The simulations were carried out at a constant isotropic pressure of 1 atm and a temperature of 300 K. The Nosé-Hoover thermostat(8, 9) and the Parrinello-Rahman barostat(10) were used. Integration of equation of motion was performed using the stochastic dynamics. A series of 51 windows with the  $\lambda$  equally spaced between 0 and 1 were constructed for both water and octanol or cyclohexane phases. Each window was simulated for 1,000 ps and the first 200 ps simulation was discarded for equilibration. A soft core potential with  $\alpha=1$ ,  $\sigma=0.3$  nm and  $\lambda$ -power of 1 was used in order to avoid singularities. The two-step procedure for decoupling LJ and electrostatic interactions independently was employed. The CHARMM general force field(11) was used for the octanol and cyclohexane and the TIP3P model(12) was used for water. Each box contained 1500 explicit waters, and either 512 octanol molecules, or 512 cyclohexane molecules, with periodic boundary conditions present, and PME used for electrostatics.

**Water-lipid bilayer partitioning.** Steered molecular dynamics (MD) and umbrella sampling simulations(13) were carried out to obtain the water-to-DPPC bilayer potentials of mean force (PMF) for the 9 drugs. In steered MD simulations, one drug was inserted into the water phase and a harmonic potential with a force constant of 1000 kJ/mol/nm<sup>2</sup> was applied between the center of mass of the drug and the center of mass of the lipid bilayer. The drug was then pulled along the z-axis (perpendicular to the bilayer/water interface) at a rate of 0.01 nm/ps to generate a number of configurations. The generated configurations were selected every 0.1 nm along the z-axis and used as starting points for subsequent umbrella sampling

simulations. In each umbrella sampling window, we carried out 50 ns umbrella sampling simulations. During umbrella sampling simulations, a biased harmonic potential with a force constant of 3000 kJ/mol/nm<sup>2</sup> was used to confine the drug within the sampling window. The free energy profiles and error estimates were determined using the weighted histogram analysis method (WHAM)(14). The first 20 ns within each window was discarded to allow for appropriate equilibration at the new solute position, and the free energy profile was determined from the remaining 30 ns.

All PMF calculations were performed using the GROMACS 4.5.5 package.(7) The simulation systems contain 0.15 M concentration of NaCl and the systems are electrostatically neutral. The CHARMM36 lipid models(15) were used for the DPPC lipid bilayer. The system was 6.3 x 6.4 x 92 nm<sup>3</sup>, with 128 DPPC molecules, 7100 explicit waters and 0.1 M NaCl. All lipid bilayer simulations were performed at 323K, and the molecular species were independently coupled to the Nosé-Hoover thermostat(8, 9) with a coupling time constant of 0.5 ps. The system’s volume was allowed to fluctuate according to the semi-isotropic pressure coupling method at 1atm, with a coupling time constant of 2 ps and compressibility of 4.5×10<sup>-5</sup> bar<sup>-1</sup>. The PME method was used for electrostatic calculations. Periodic boundary conditions were employed in all our simulations. All bonds lengths in molecules apart from water were constrained using the LINCS algorithm(16). The TIP3P water molecule bonds were constrained using the SETTLE algorithm(17). The simulation time step was 2 fs. Other simulation parameters are found in (18).

## REST simulations.

**REST Theory.** Replica Exchange molecular dynamics (REMD) is a method used to speed up conformational sampling by running a number of simulations in parallel at different temperatures. The high temperature simulations allow for transitions over barriers to be sped up, while the low temperature simulations explore the conformations in the energetic valleys. By regularly swapping coordinates between the replicas, the high temperature simulations help the simulation at the low temperature to more rapidly explore the conformational landscape. For large systems, REMD requires a very large number of simulations to be run to allow for overlap between the potential energies of adjacent replicas and smooth swaps in conformations. Replica Exchange Solute Scaling/Tempering (REST2) is the second iteration of REST1, a method used to reduce the number of replicas required for large systems. In these methods the idea is to only change the temperature in part of the system, while the temperature in the other parts remains constant. To achieve this, the potential surface for replica  $m$  was rescaled as follows:

$$E^{REST1}(T_m) = E_{pp}(T_m) + \left(\frac{\beta_0}{\beta_m}\right) E_{ww}(T_m) + \left(\frac{\beta_0 + \beta_m}{2\beta_m}\right) E_{pw}(T_m) \quad (8)$$

where  $\beta_m = \frac{1}{k_B T_m}$ ,  $\beta_0 = \frac{1}{k_B T_0}$ ,  $E_{T_m}$  is the energy of the entire system at temperature  $T_m$ ,  $E_{pp}$ , is the interaction energies within the group(s) of interest,  $E_{pw}$  is the interaction energies between the group of interest and the other parts of the system, and  $E_{ww}$  is the interaction energies within the other parts of

the system(19). Note that when  $\beta_m = \beta_0$ , the original energy surface is recovered.

The exchange rate between two replicas  $m$  and  $n$  is calculated as

$$\Delta_{nm}(REST1) = (\beta_n - \beta_m) \left[ (E_{pp}(T_m) + \frac{1}{2}E_{pw}(T_m)) - (E_{pp}(T_n) + \frac{1}{2}E_{pw}(T_n)) \right] \quad (9)$$

where the subscripts  $m$  and  $n$  are used to denote two neighbouring temperatures(19).

When the first implementation of REST was benchmarked, it was found that as the number of particles in the system increased, the scaling was poorer than expected(20). Therefore, a more efficient method of REST was implemented by (21) as previously suggested(22, 23). This iteration of REST uses the law of corresponding states, or that “the thermodynamic properties of a system with potential energy  $E_m$  at temperature  $T_m$ , are the same as those for a system with potential energy  $(\frac{T_0}{T_m})E_m$  at temperature  $T_0$ .” Therefore, instead of using different potential energies and different temperatures for each replica, each replicate would be run at the same temperature, but the potential surface for each replicate would still be different(24, 25).

This resultant potential energy surface for temperature  $T_m$  is

$$E^{REST2}(T_m) = \left(\frac{\beta_m}{\beta_0}\right) E_{pp}(T_m) + \sqrt{\frac{\beta_m}{\beta_0}} E_{pw}(T_m) + E_{ww}(T_m) \quad (10)$$

where  $\beta_m = \frac{1}{k_B T_m}$ ,  $\beta_0 = \frac{1}{k_B T_0}$ ,  $E_{T_m}$  is the energy of the entire system at temperature  $T_m$ ,  $E_{pp}$  is the interaction energies within the group(s) of interest,  $E_{pw}$  is the interaction energies between the group of interest and the other parts of the system, and  $E_{ww}$  is the interaction energies within the other parts of the system(21).

The exchange rate between two replicas  $m$  and  $n$  is calculated as

$$\Delta_{nm}(REST2) = (\beta_m - \beta_0) \left[ (E_{pp}(T_n) - E_{pp}(T_m)) + \frac{\sqrt{\beta_0}}{\sqrt{\beta_m} + \sqrt{\beta_n}} (E_{pw}(T_n) - E_{pw}(T_m)) \right] \quad (11)$$

where subscripts  $m$  and  $n$  denote two neighbouring temperatures. This method was implemented in NAMD2.10(26), and found to have more efficient scaling with larger systems than REST1. This implementation was used for all REST simulations.

**Simulation Parameters.** The NavAb pore domain (residues 146-230 in the sequence, x-ray crystallographic coordinates from pdb 3rvy(27)) and NavMs pore domain (residues 129-213 in the sequence, x-ray crystallographic coordinates from pdb 4p9o(28)) were embedded in a bilayer of 126 and 129 all-atom 1-Palmitoyl-2-oleoylphosphatidylcholine (POPC) lipids, respectively. Explicit TIP3P water molecules ( 10500) were used, as well as an ion concentration of 150mM NaCl. These two systems were the starting point of our equilibration simulations, and each system was 54500 particles. For the NavPas systems,

cryo-EM coordinates of the pore domain from pdb 5x0m(29) were embedded into a bilayer of 151 all-atom 1-Palmitoyl-2-oleoylphosphatidylcholine (POPC) lipids, with 16000 explicit TIP3P water molecules, and an ion concentration of 150mM NaCl with an overall system size of 78000 atoms. Note that for all systems associated with the REST simulations, NAMD2.10(<http://www.ks.uiuc.edu/Research/namd/>)(30) was used to run all equilibration and unbiased simulations, NAMD2.10+REST2 patch(26) was used for all REST simulations, with VMD(2) used for visualisation and analysis. Local scripts were written for additional analysis, such as for the energy landscape and volume analysis.

**Equilibration of 3rvy, 4p9o and 5x0m Systems.** All equilibrations were run at a temperature of 310K, with a 1fs timestep. Langevin dynamics were used, as well as PME, with a grid spacing of 1.0 Å. The simulations were run at NPT, with the dcd frequency set at 1ps, with the pressure set at 1 atm. In the first equilibration step, a minimization of 1 ps was run, followed by a 10 ns production run with all protein atoms fixed. The second equilibration was run for 6 ns, with constraints placed only on the backbone. These constraints were relaxed slowly from 10 kcal/mol/Å<sup>2</sup> down to 0.1 kcal/mol/Å<sup>2</sup>, with a 1 ps minimisation, followed by a production run for 1 ns for each constraint. The final frame from the second equilibration of each system was used as the starting point for REST simulations of 3rvy and 4p9o, and the last frame of a 375 ns unrestrained simulation was used as a starting point for the 5x0m system.

**Addition of Compounds Into the Equilibrated Systems.** The final pdb structure from the second equilibration step was visualised in VMD, and the pdb structure of the parameterised drug was placed into the middle of the pore. Care was taken to place the drug in such a manner that there were no steric clashes. The drug pdb and pore+lipid system pdb were combined, and if the drug was charged, the system re-neutralised. This final pdb system was used as a starting point for both the unbiased and the REST simulations.

**Parameters of the Unbiased and REST2 protein+drug simulations.** Both the unbiased and REST2 simulations were run at 310K, with a 2 fs time step. The pressure was 1 atm, and the system was NPT. PME was used with a 1 Å cutoff, and langevin dynamics was used. For the unbiased simulation, the temperature was set to 310K. For the REST2 simulations, 21 parallel simulations were run, with the effective temperature of the protein and the drug system ranging from 310K-410K. Only the protein and the drug were used as the ‘hot’ parts of the system, whilst the lipids, waters and ions were used as the ‘cool’ parts of the system. The temperature of the *i*th replica for the hot region was determined by the equation

$$T_i = T_0 \exp \left[ \ln \left( \frac{T_{max}}{T_0} \right) \left( \frac{i}{N_{rep} - 1} \right) \right] \quad (12)$$

where  $T_0$  and  $T_{max}$  are the lowest and the highest temperature used in the simulation, and  $N_{rep}$  is the total number of interactions. It should be noted that among the bonded interactions, only the dihedrals are scaled(26). Exchanges were attempted every 2ps, to allow the drug to more efficiently sample its position before exchange. Constraints were added onto the backbone at 0.1 kcal/mol/Å<sup>2</sup>, and a collective variable was added to the drug to keep it from exiting the pore,

with a radius of 37 Å from the pore center, and a constant of 20 kcal/mol/Å<sup>2</sup>.

1. Mayne CG, Saam J, Schulten K, Tajkhorshid E, Gumbart JC (2014) Rapid parameterization of small molecules using the Force Field Toolkit. *JCTC* 34(32):1–28.
2. Humphrey, W., Dalke, A., Schulten K (1996) VMD: Visual Molecular Dynamics. *J. Mol. Graph* 14:33–38.
3. Vanommeslaeghe K, Mackerell AD (2012) Automation of the CHARMM General Force Field (CGenFF) I: Bond Perception and Atom Typing. *J. Chem. Inf. Model.* 52:3144–3154.
4. Vanommeslaeghe K, Prabhu Raman E, MacKerell Jr AD (2012) Automation of the CHARMM General Force Field (CGenFF) II: Assignment of bonded parameters and partial atomic charges. *J. Chem. Inf. Model.* 52(12):3155–3168.
5. Mackerell AD, et al. (1998) All-Atom Empirical Potential for Molecular Modeling and Dynamics Studies of Proteins. *J. Phys. Chem. B* 5647(97):3586–3616.
6. Bennett CH (1976) Efficient Estimation of Free Energy Differences from Monte Carlo Data. *J. Comput. Phys.* 22:245–268.
7. Hess B, Kutzner C, van der Spoel D, Lindahl E (2008) GROMACS 4 : Algorithms for Highly Efficient , Load-Balanced , and Scalable Molecular Simulation. *JCTC* 4:435–447.
8. Hoover WG (1985) Canonical dynamics: Equilibrium phase-space distributions. *Phys.Rev. A* 31(3):1695–1697.
9. Nosé SA (1984) A molecular dynamics method for simulations in the canonical ensemble. *Mol. Phys.* 52(2):255–268.
10. Parrinello M, Rahman A (1981) Polymorphic transitions in single crystals: A new molecular dynamics method. *J. Appl. Phys.* 52(12):7182.
11. Vanommeslaeghe K, et al. (2010) CHARMM General Force Field (CGenFF): A force field for drug-like molecules compatible with the CHARMM all-atom additive biological force fields. *J. Comput. Chem.* 31(4):671–690.
12. Jorgensen WL, et al. (1983) Comparison of simple potential functions for simulating liquid water. *J. Chem. Phys.* 79:926–935.
13. Torrie GM, Valleau JP (1977) Nonphysical Sampling Distributions in Monte Carlo Free-Energy Estimation: Umbrella Sampling. *J. Comput. Phys.* 23:187–199.
14. Kumar S, Bouzida D, Swendsen RH, Kollman PA, Rosenberg JM (1992) The Weighted Histogram Analysis Method for Free-Energy Calculations on Biomolecules. I. The Method. *J. Comput. Chem.* 13(8):1011–1021.
15. Klauda JB, et al. (2010) Update of the CHARMM All-Atom Additive Force Field for Lipids : Validation on Six Lipid Types. *J. Phys. Chem. B* 114:7830–7843.
16. Hess B (2008) P-LINCS: A Parallel Linear Constraint Solver for Molecular Simulation. *JCTC* 4(1):116–122.
17. Miyamoto S, Kollman PA (1992) SETTLE : An Analytical Version of the SHAKE and RATTLE Algorithm for Rigid Water Models. *J. Comput. Chem.* 13(8):952–962.
18. Sun D, Forsman J, Woodward E (2015) Evaluating Force Fields for the Computational Prediction of Ionized Arginine and Lysine Side-Chains Partitioning into Lipid Bilayers and Octanol. *JCTC* 11:1775–1791.
19. Liu P, Byungchan K, Friesner RA, Berne BJ (2005) Replica exchange with solute tempering: A method for sampling biological systems in explicit water. *PNAS* 132:13749–13754.
20. Liu P, Byungchan K, Friesner RA, Berne BJ (2005) Replica Exchange with Solute Tempering: Efficiency in Large Scale Systems. *J. Phys. Chem. B* 111:5405–5410.
21. Wang L, Friesner RA, Berne BJ (2011) Replica Exchange with Solute Scaling : A More Efficient Version of Replica Exchange with Solute Tempering ( REST2 ). *J. Phys. Chem. B* 115:9431–9438.
22. Moors SL, Michielssens S, Ceulemans A (2011) Improved Replica Exchange Method for Native-State Protein Sampling. *JCTC* 7:231–237.
23. Terakawa T, Kameda T, Takada S (2011) On easy implementation of a variant of the replica exchange with solute tempering in GROMACS. *J. Comput. Chem.* 7:1228–1234.
24. Fukunishi H, Watanabe O, Takada S (2002) On the Hamiltonian replica exchange method for efficient sampling of biomolecular systems: Application to protein structure prediction. *J. Chem. Phys.* 116:9058–9067.
25. Affentranger R, Tavernelli I, Ernesto EDI (2006) A Novel Hamiltonian Replica Exchange MD Protocol to Enhance Protein Conformational Space Sampling. *JCTC* 2:217–228.
26. Jo S, Jiang W (2015) A generic implementation of replica exchange with solute tempering ( REST2 ) algorithm in NAMD for complex biophysical simulations. *Computer Physics Communications* 197:304–311.
27. Payandeh J, Scheuer T, Zheng N, Catterall WA (2011) The crystal structure of a voltage-gated sodium channel. *Nature* 475(7356):353–358.
28. Bagnéris C, et al. (2014) Prokaryotic NavMs channel as a structural and functional model for eukaryotic sodium channel antagonism. *PNAS* 111(23):8428–8433.
29. Shen H, et al. (2017) Structure of a eukaryotic voltage-gated sodium channel at near-atomic resolution. *Science* 355(6328):1–12.
30. Phillips JC, et al. (2005) Scalable molecular dynamics with NAMD. *J. Comp. Chem.* 26(16):1781–1802.

Supplementary Figures

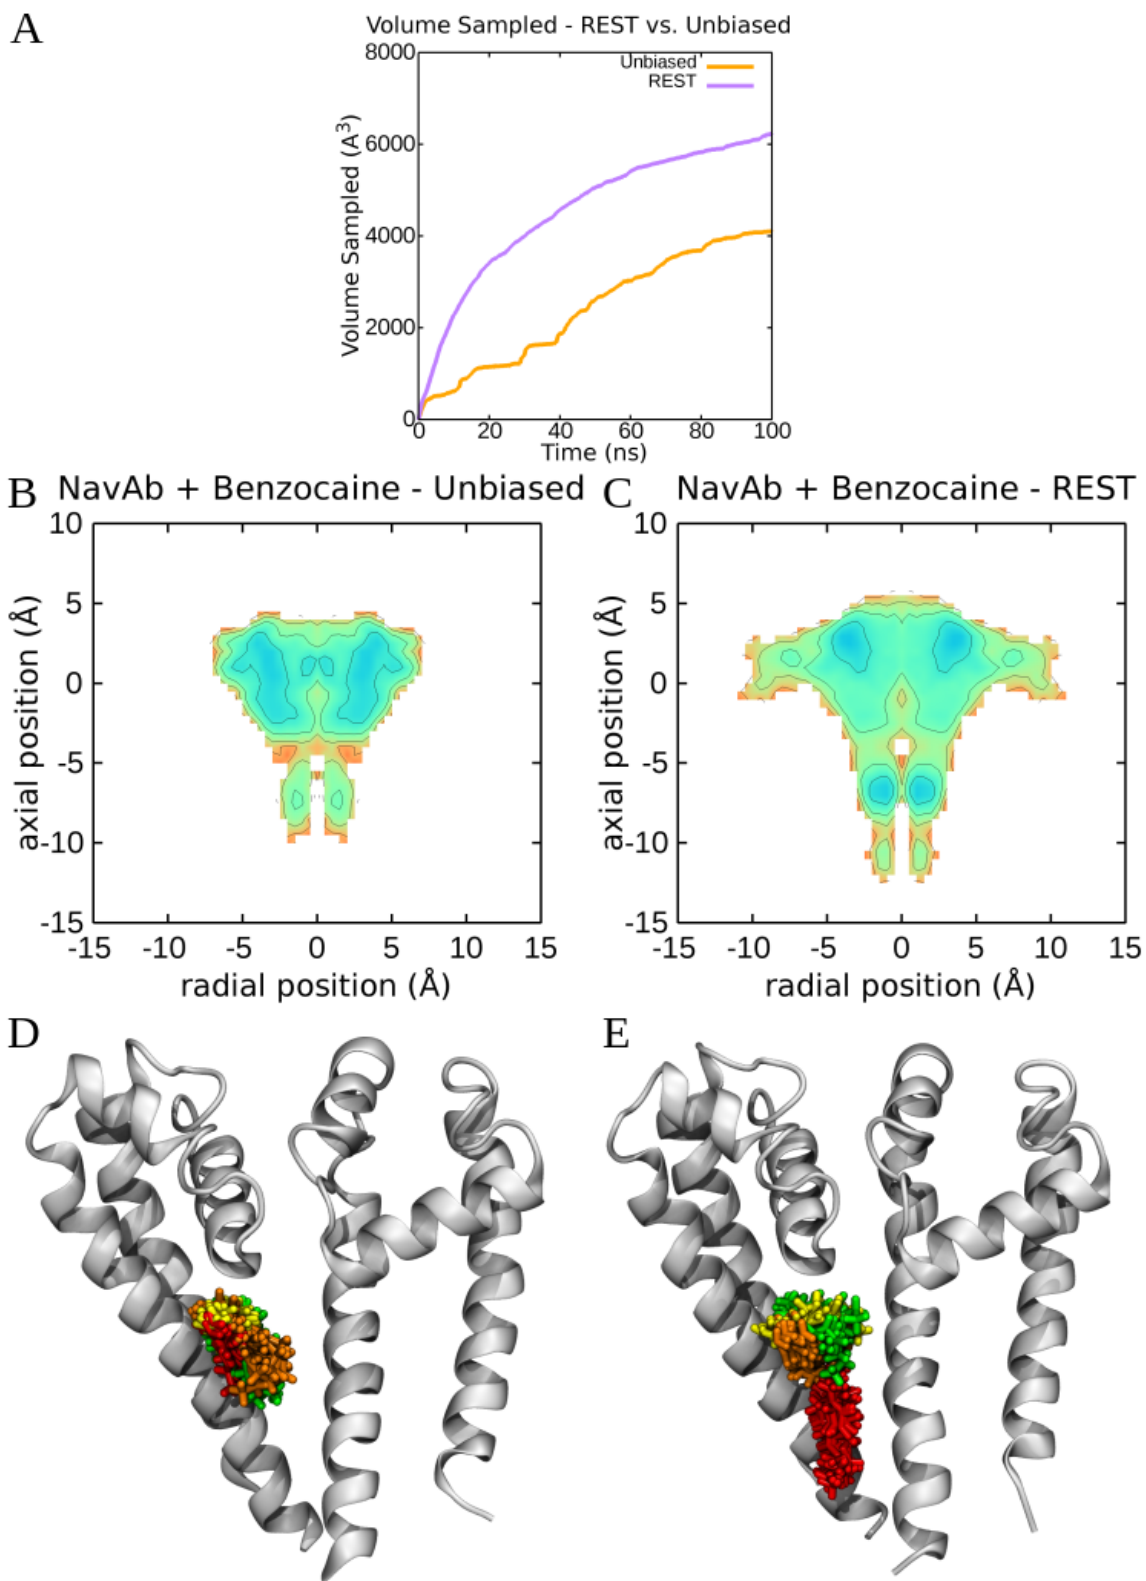

**Fig. S1.** REST increases conformational sampling. A) Volume sampled by the unbiased vs. REST simulations of test systems NavAb (pdb ID 3RVY) and Benzocaine. The unbiased simulation is represented by an orange line, and the REST simulation is represented by a purple line. Energy landscapes of unbiased (B) vs. REST (C) simulations. Energies are in kCal/mol. Four most populous clusters of the unbiased (D) vs. REST (E) simulations. Two subunits of NavAb are in grey surface representation, and the four most populous clusters are in red, orange, yellow and green licorice.

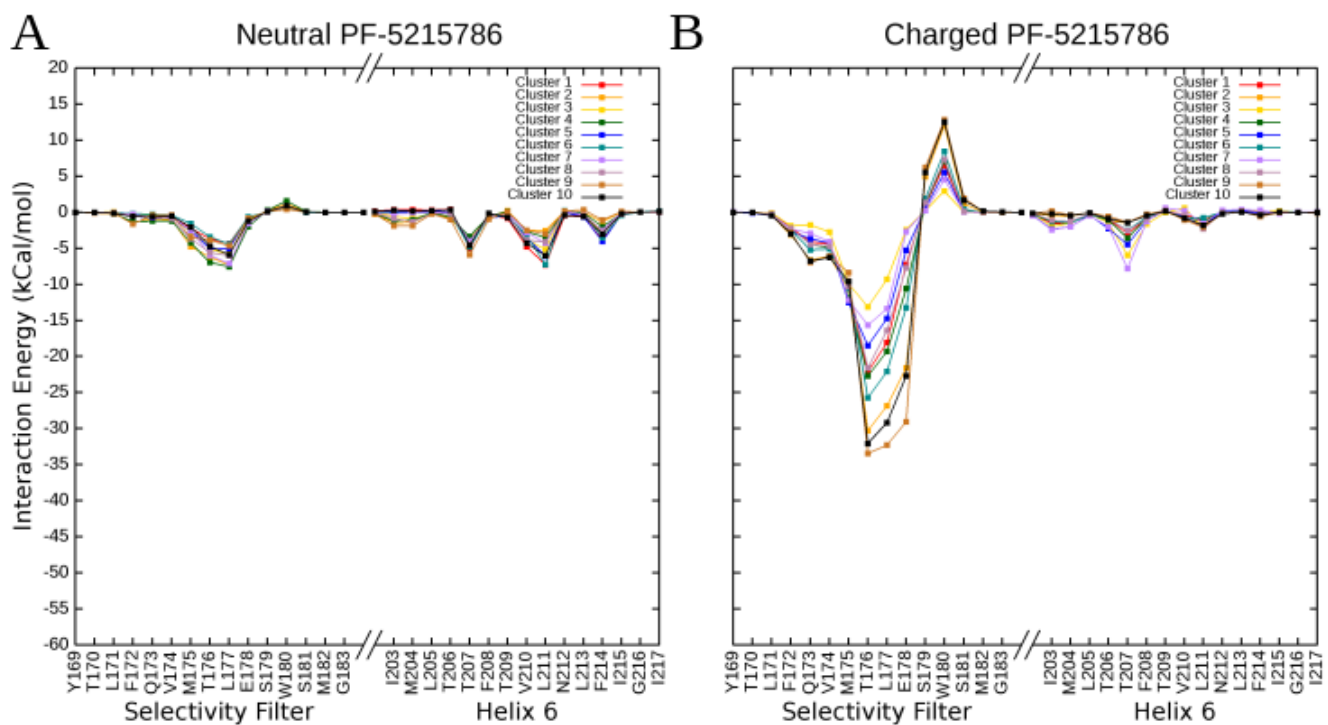

**Fig. S2.** Interaction energies of specific NavMs residues with each of the 10 most populated clusters of neutral PF-5215786 (A) and charged PF-5215786 (B). Each cluster is shown as a separate line, and only residues from the selectivity filter (left half) and the S6 helix (right half) are shown.

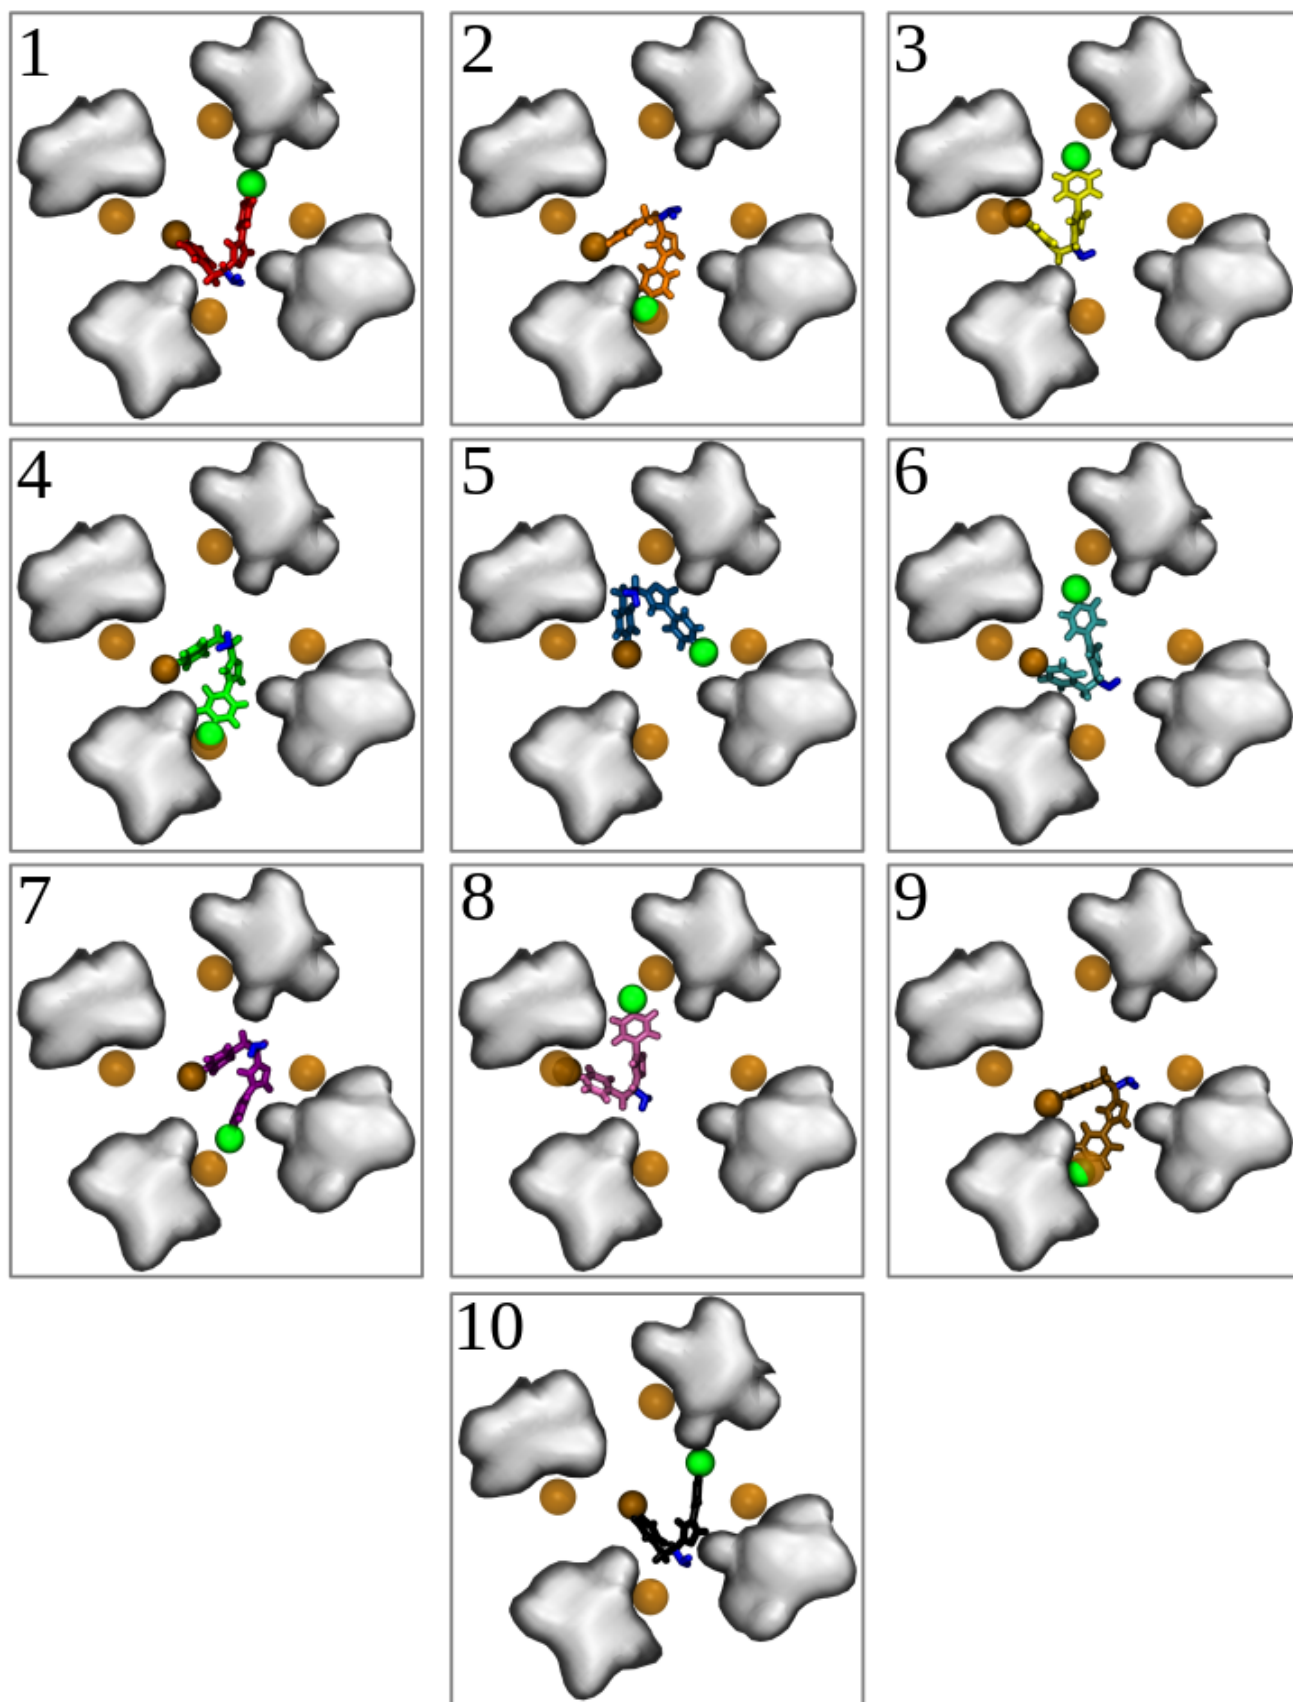

**Fig. S3.** Representative images of all 10 clusters of neutral PF-5215786. Each cluster is shown as a different panel and labelled with their cluster number, and PF-5215786 a different colour for each cluster. In all panels, part of the S6 helix is shown as a grey surface, and the crystallographic bromine atoms are shown in brown transparent spheres. The bromine and chlorine atom on the drug is shown as a brown and green solid sphere, respectively.

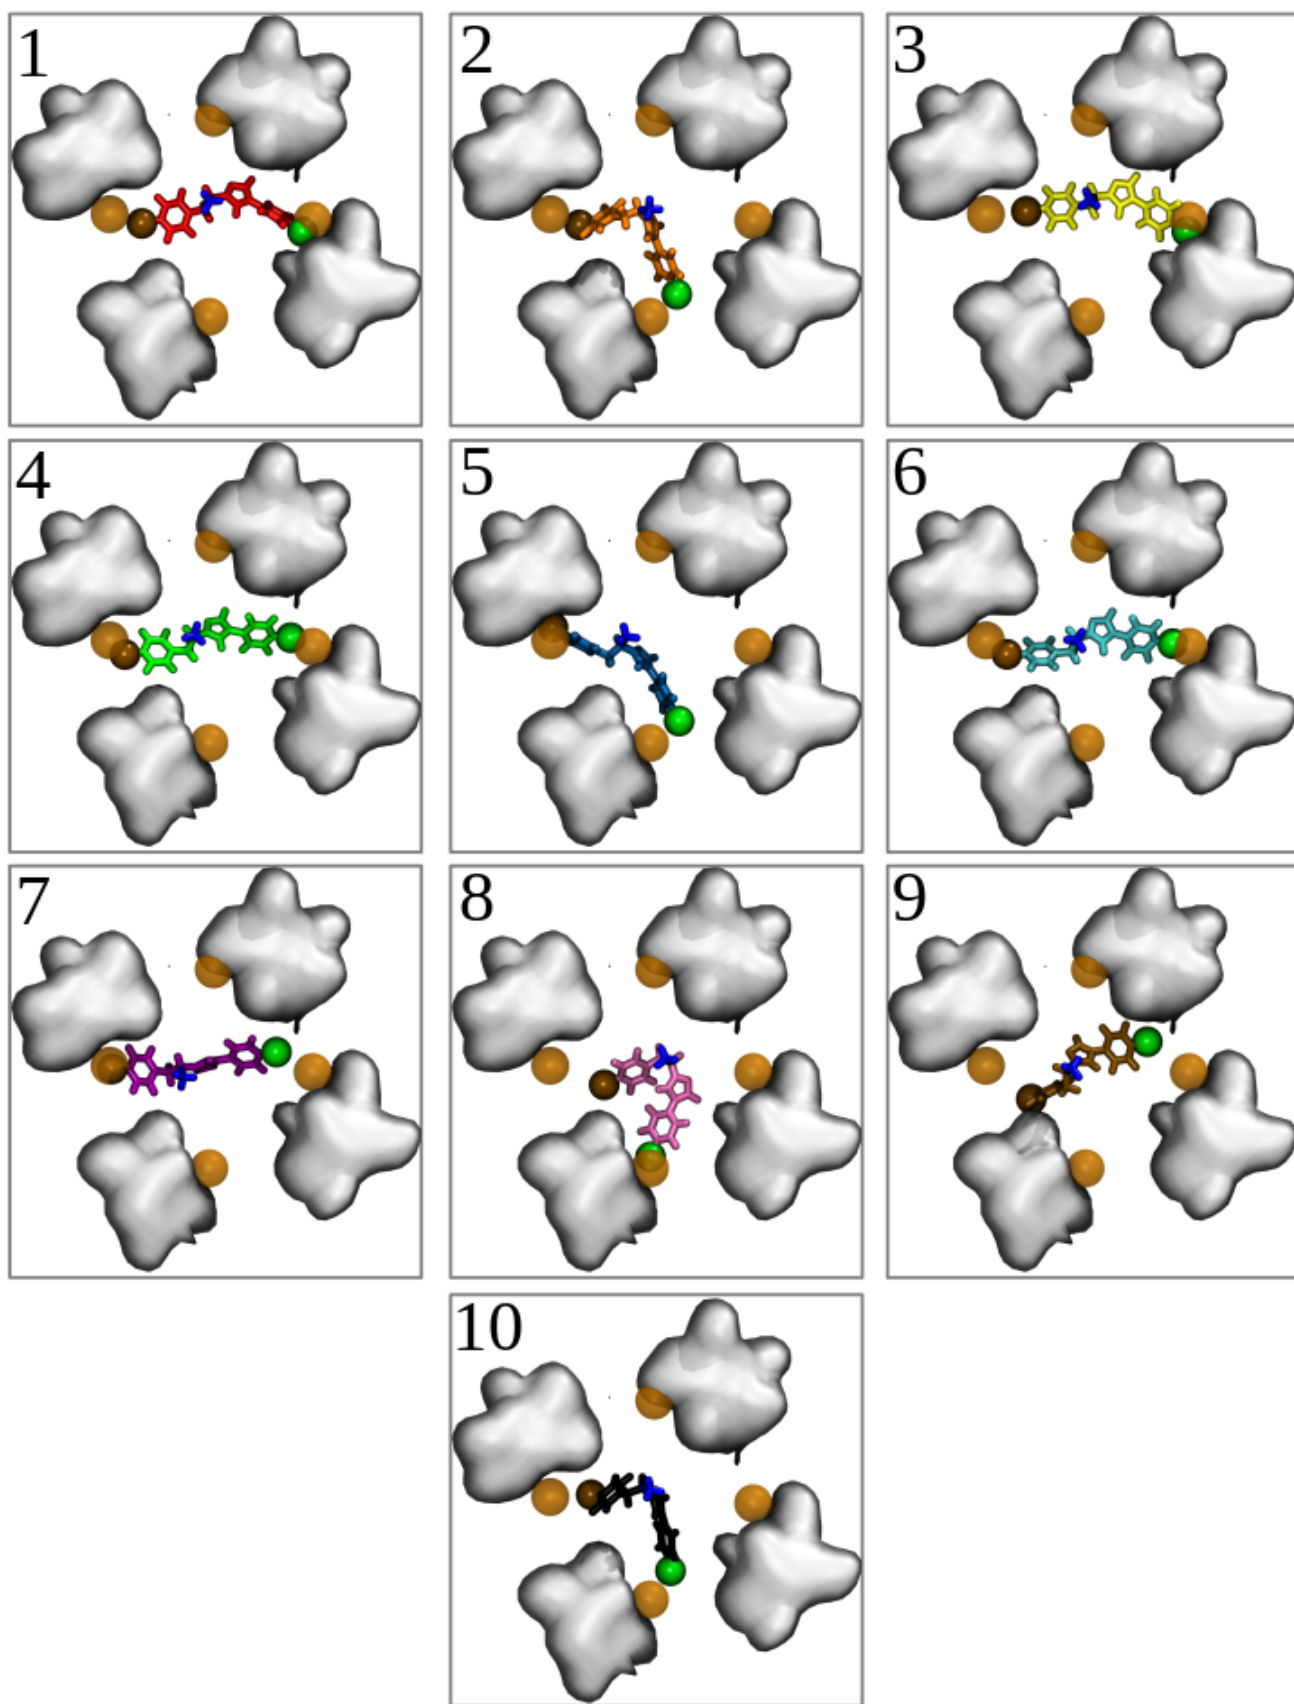

**Fig. S4.** Representative images of all 10 clusters of charged PF-5215786. Each cluster is shown as a different panel and labelled with their cluster number, and PF-5215786 a different colour for each cluster. In all panels, part of the S6 helix is shown as a grey surface, and the crystallographic bromine atoms are shown in brown transparent spheres. The bromine and chlorine atom on the drug is shown as a brown and green solid sphere, respectively.

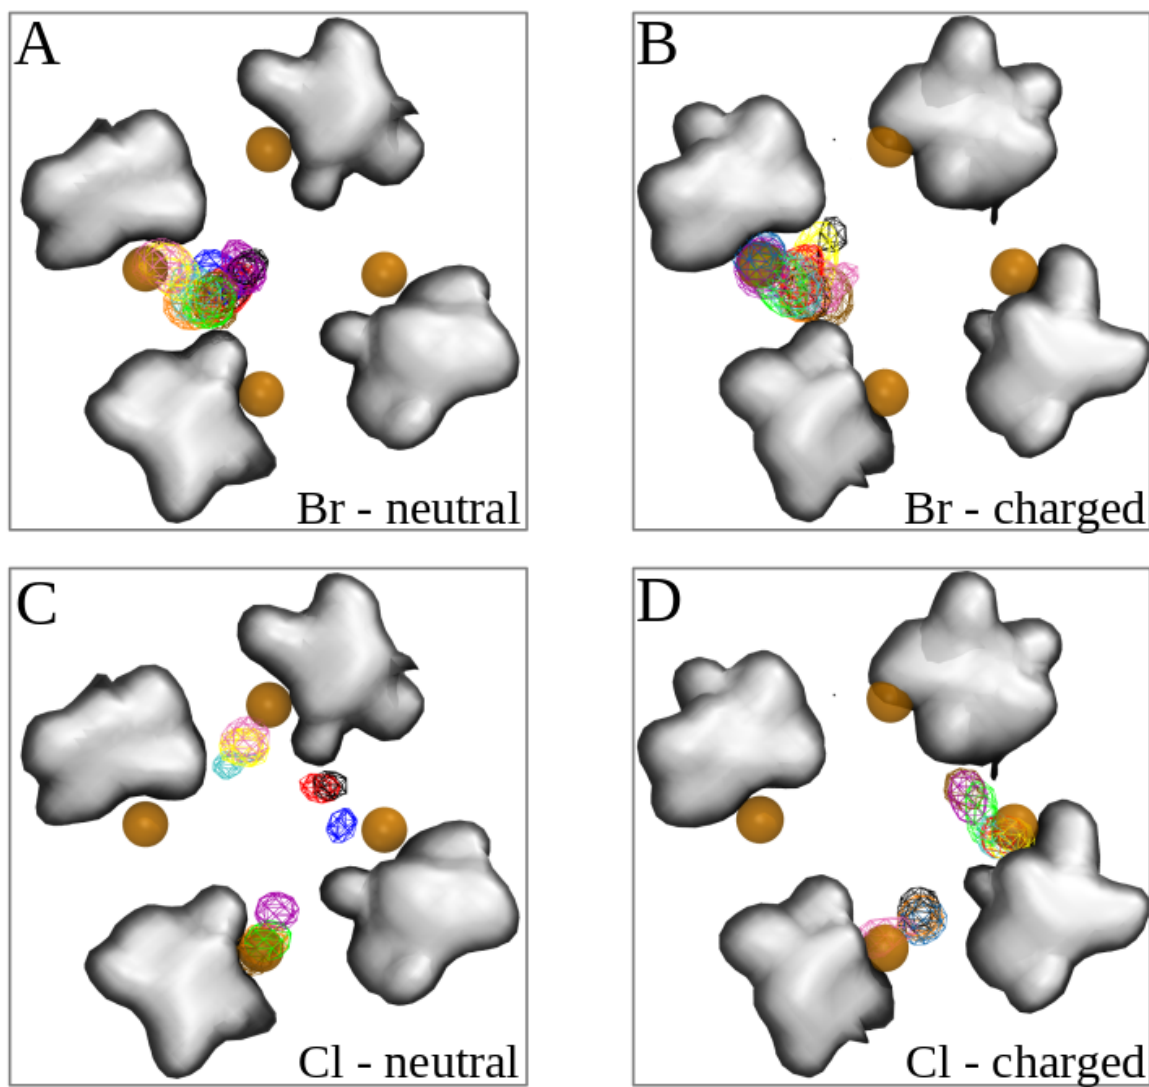

**Fig. S5.** Densities of Bromine and Chlorine atoms for the neutral (left) and the charged (right) versions of PF-5215786. Bromine atom densities are shown in (A) and (B), and chlorine atom densities are shown in (C) and (D). The densities are shown as mesh, with each color representing a different cluster. Part of the S6 helix is shown in grey surface, and the crystallographic bromine atoms are shown in brown transparent spheres.



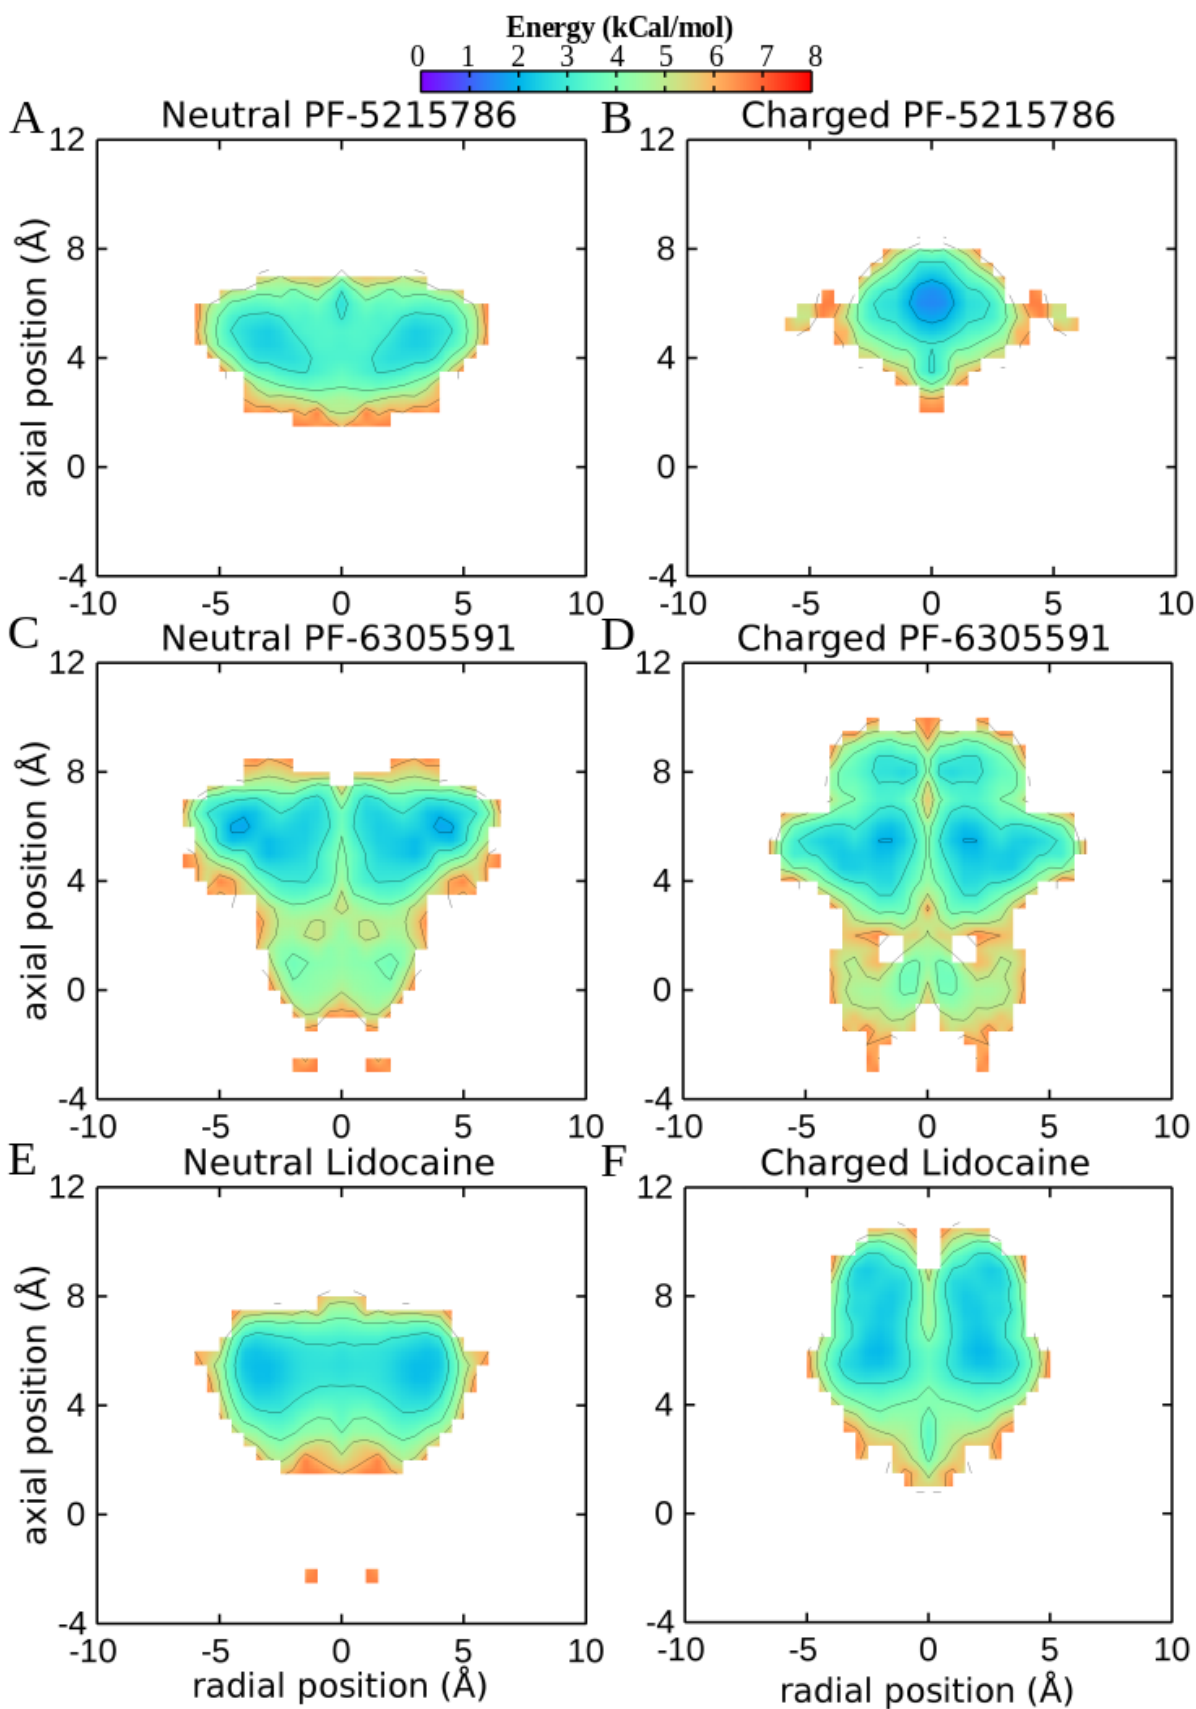

**Fig. S6.** Energy landscapes of the centre of mass of neutral PF-5215786 (A), charged PF-5215786 (B), neutral PF-6305591 (C), charged PF-6305591 (D), neutral lidocaine (E), and charged lidocaine (F) inside the pore of NavMs. Energies are shown in kCal/mol.

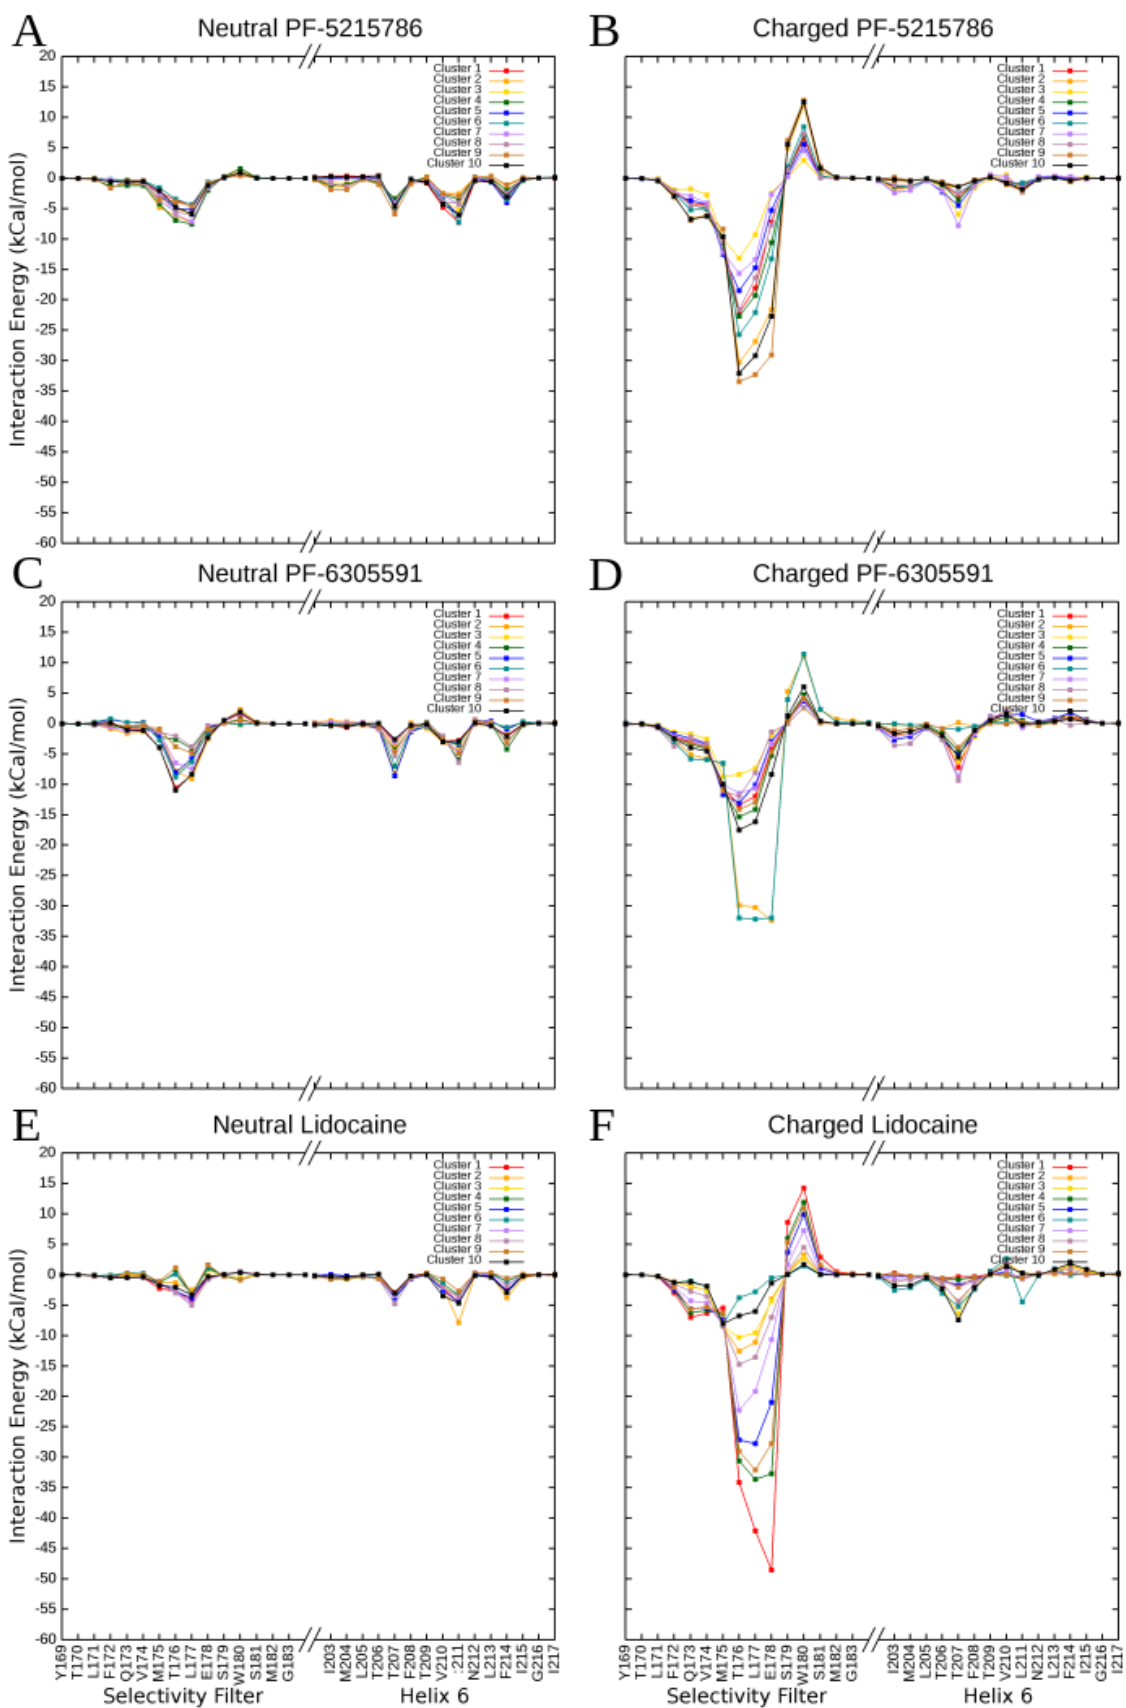

**Fig. S7.** Drug-protein interaction energies of specific protein residues with each of the 10 most populated clusters of neutral PF-5215786 (A), charged PF-5215786 (B), neutral PF-6305591 (C), charged PF-6305591 (D), neutral lidocaine (E), and charged lidocaine (F). Each cluster is shown as a separate line, and only residues from the selectivity filter (left half) and the S6 helix (right half) are shown.

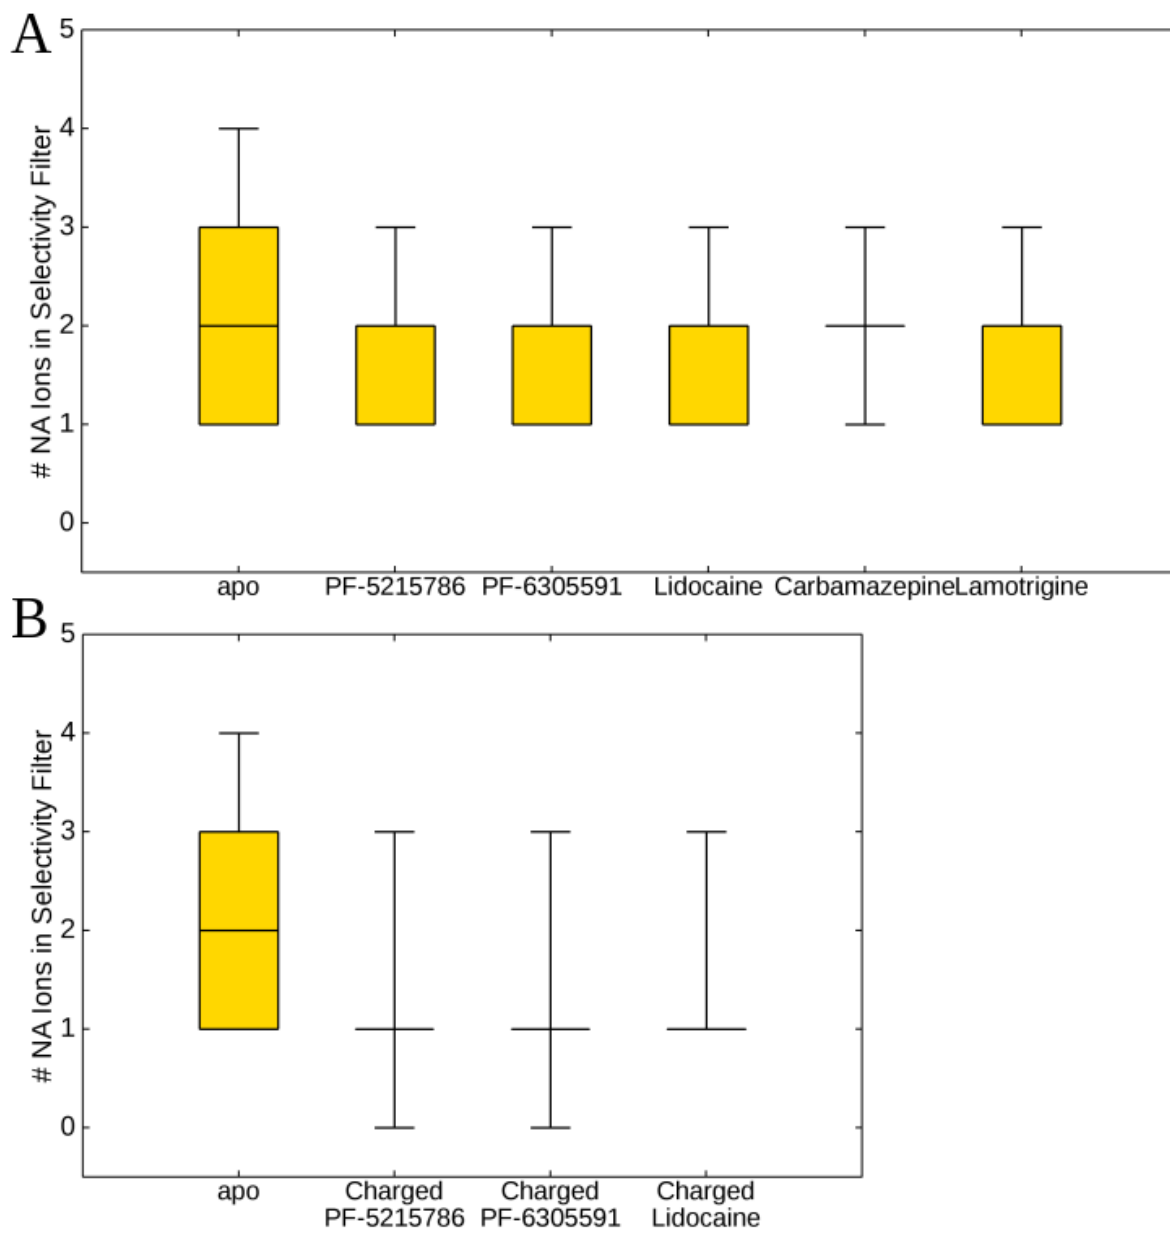

**Fig. S8.** Number of sodium ions in the selectivity filter for all frames of the neutral compounds (A) and charged (B) compounds as compared to an apo simulation.

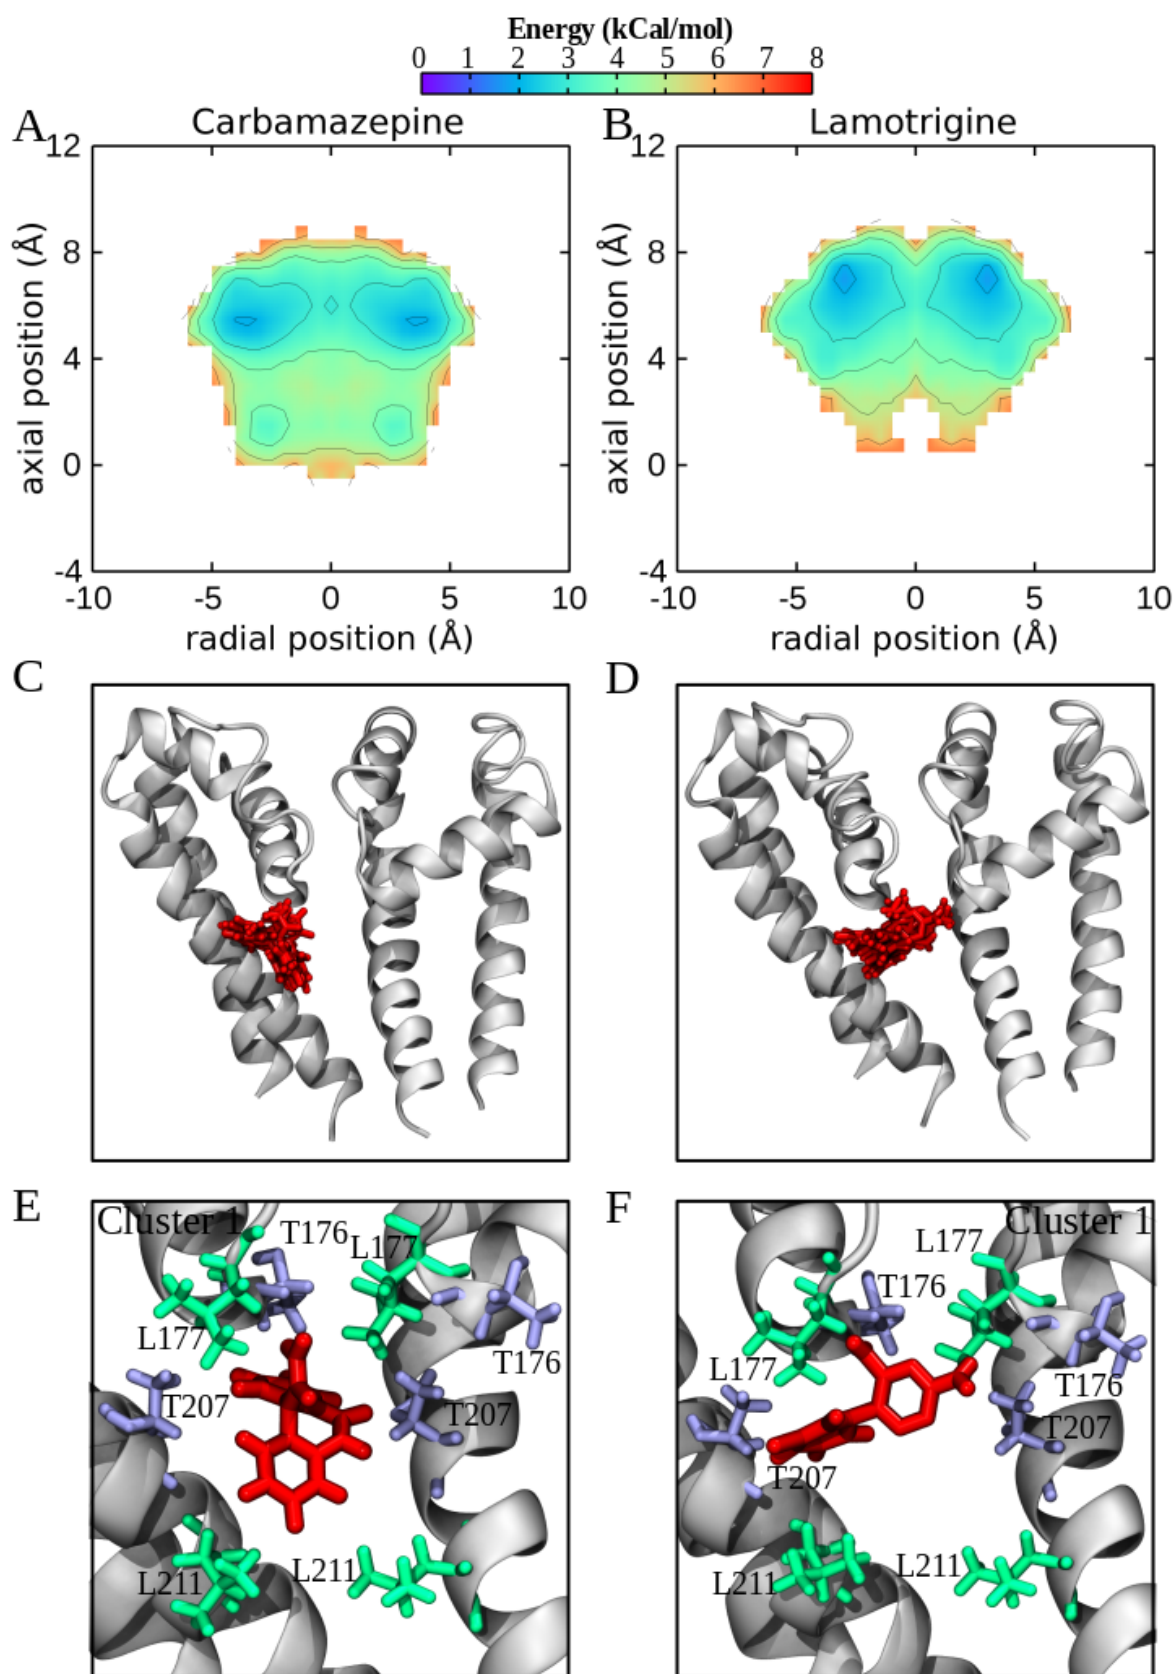

**Fig. S9.** Binding of perpetually neutral compounds in the pore. Energy landscapes (in kCal/mol) of the centres of mass of Carbamazepine (A) and Lamotrigine (B) inside the central cavity of the pore. The most populated clusters are shown for both Carbamazepine (C) and Lamotrigine (D), with the channel in grey cartoon, and the compound in red licorice. A representative frame from the most populated cluster of Carbamazepine (E) and Lamotrigine (F) are shown in red licorice, and surrounding residues (176T, 177L, 207T, 211L) shown in iceblue (T) and green (L).

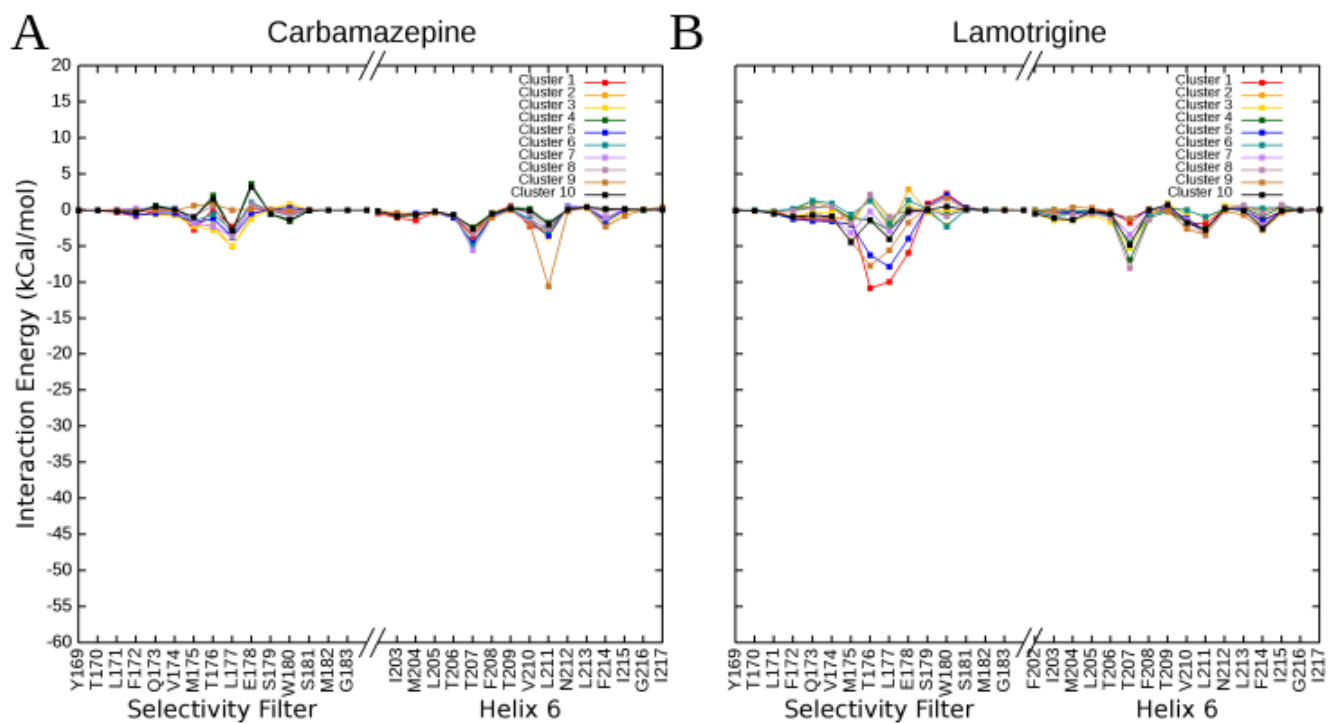

**Fig. S10.** Drug-protein interaction energies of specific protein residues with each of the 10 most populated clusters of Carbamazepine (A) and Lamotrigine (B). Each cluster is shown as a separate line, and only residues from the selectivity filter (left half) and the S6 helix (right half) are shown.

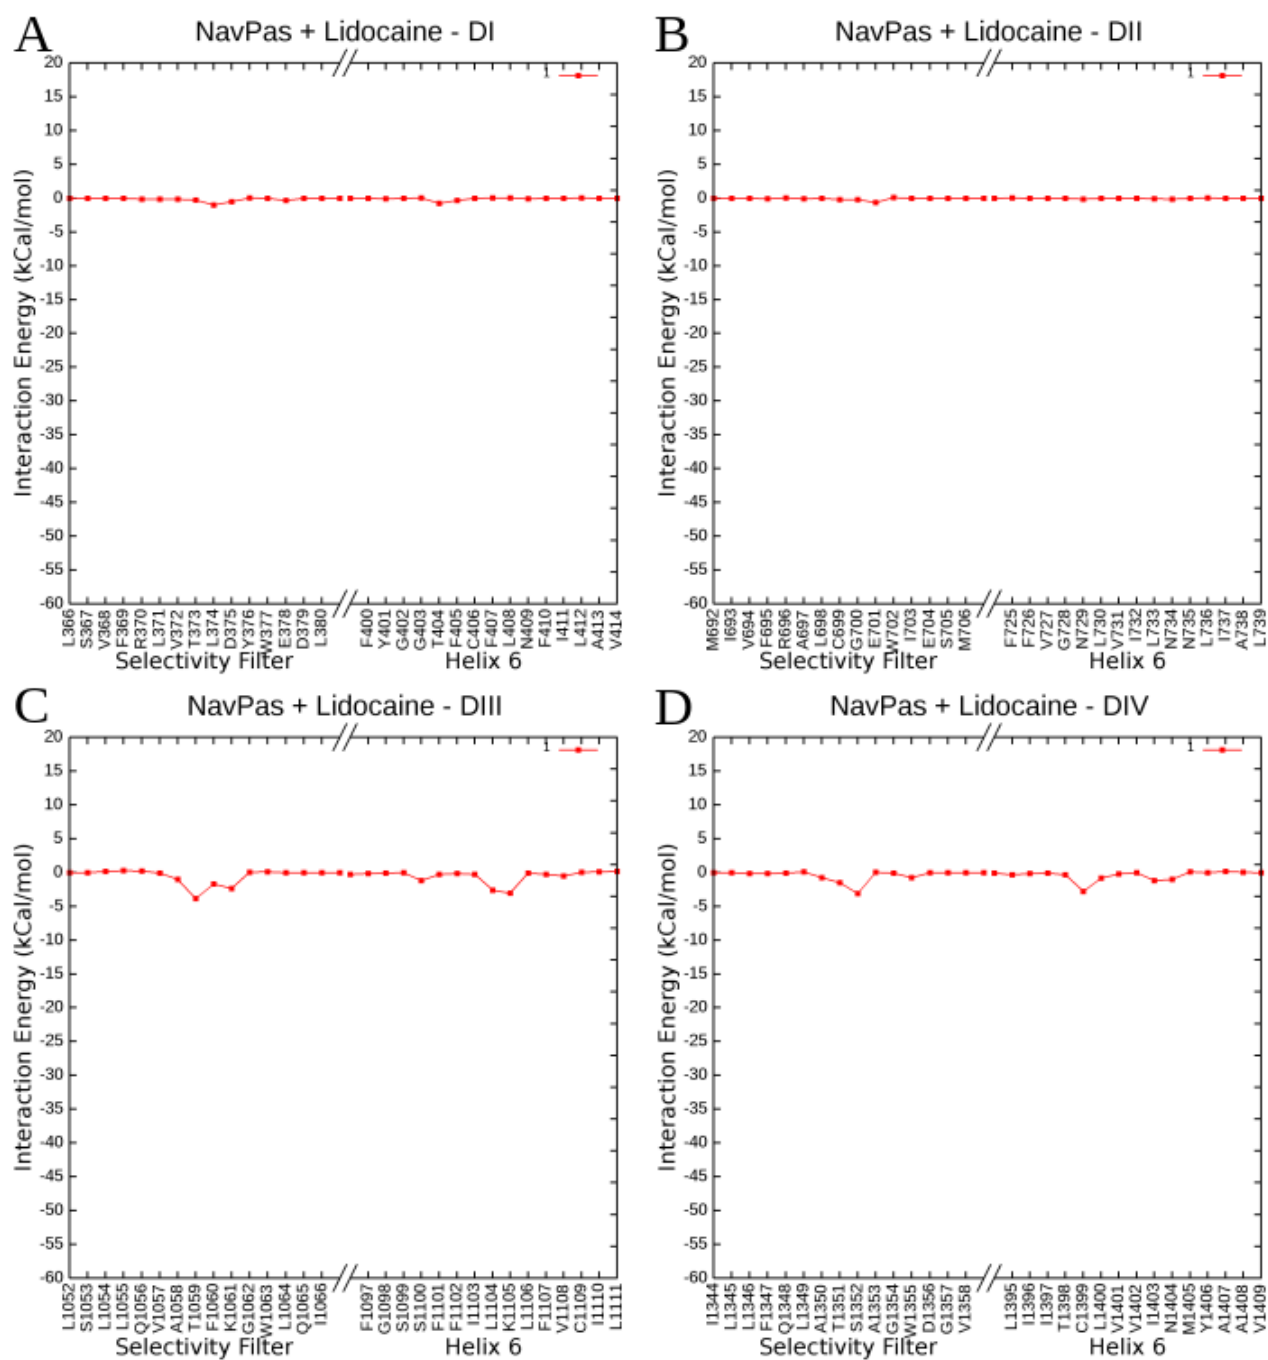

**Fig. S11.** Drug-protein interaction energies of the most populous cluster of lidocaine with specific protein residues on DI-IV of NavPas (A-D, respectively). Only residues from the selectivity filter (left half) and the S6 helix (right half) are shown.

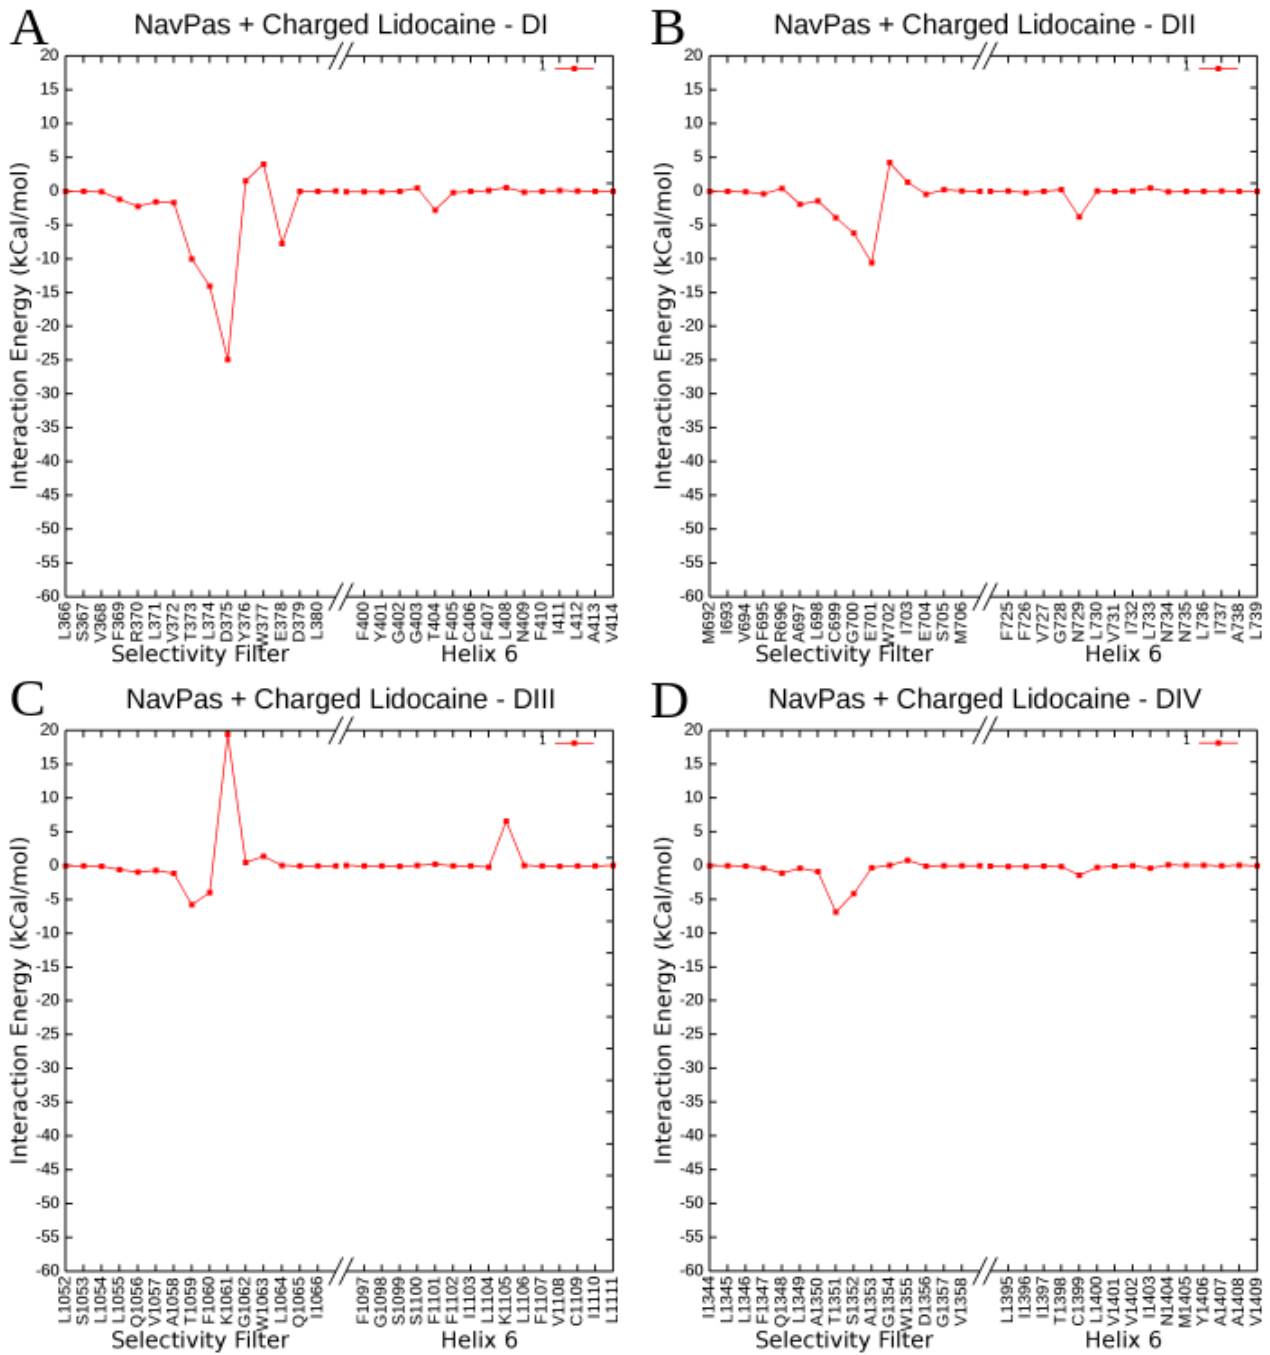

**Fig. S12.** Drug-protein interaction energies of the most populous cluster of charged lidocaine with specific protein residues on DI-IV of NavPas (A-D, respectively). Only residues from the selectivity filter (left half) and the S6 helix (right half) are shown.

## Supplementary Tables

| Compounds     | Octanol-water partitioning |             |       | Cyclohexane-water partitioning |              |       |
|---------------|----------------------------|-------------|-------|--------------------------------|--------------|-------|
|               | Free energies (kCal/mol)   |             | Log P | Free energies (kCal/mol)       |              | Log P |
|               | MD                         | MD          | Exp   | MD                             | MD           | Exp   |
| Benzocaine    | 3.6 ± 0.1                  | 2.61 ± 0.07 | 1.86  | 0.56 ± 0.08                    | 0.41 ± 0.06  | 0.27  |
| Carbamazepine | 4.4 ± 0.2                  | 3.2 ± 0.2   | 2.45  | -0.1 ± 0.2                     | -0.1 ± 0.1   | NA    |
| Lamotrigine   | 3.0 ± 0.7                  | 2.2 ± 0.5   | 1.87  | -6.31 ± 0.08                   | -4.59 ± 0.06 | NA    |
| Lidocaine     | 7.9 ± 0.1                  | 5.73 ± 0.09 | 2.44  | 6.9 ± 0.2                      | 5.0 ± 0.1    | NA    |
| PF-5215786    | 9.3 ± 0.1                  | 6.79 ± 0.07 | NA    | 6.79 ± 0.08                    | 4.95 ± 0.06  | NA    |
| PF-6305591    | 5.8 ± 0.1                  | 4.22 ± 0.07 | NA    | -3.9 ± 0.1                     | -2.84 ± 0.08 | NA    |

**Table S1. Comparison of simulated octanol-water partitionings and associated partition coefficients (logP) with experimental values. Units are in kcal/mol. Numbers are shown for simulations in GROMACS.**

| Simulation                | Duration           |
|---------------------------|--------------------|
| <i>NavAb Simulations</i>  |                    |
| NavAb+Benzocaine-Unbiased | 1x100ns            |
| NavAb+Benzocaine-REST     | 1x100ns (21x100ns) |
| <i>NavMs Simulations</i>  |                    |
| NavMs-apo                 | 1x100ns (Unbiased) |
| NavMs+PF-5215786          | 1x100ns (21x100ns) |
| NavMs+charged PF-5215786  | 1x100ns (21x100ns) |
| NavMs+Carbamazepine       | 1x100ns (21x100ns) |
| NavMs+Lamotrigine         | 1x100ns (21x100ns) |
| NavMs+PF-6215591          | 1x100ns (21x100ns) |
| NavMs+charged PF-6315591  | 1x100ns (21x100ns) |
| NavMs+Lidocaine           | 1x100ns (21x100ns) |
| NavMs+charged Lidocaine   | 1x100ns (21x100ns) |
| NavPas+Lidocaine          | 1x100ns (25x100ns) |
| NavPas+charged Lidocaine  | 1x100ns (25x100ns) |

**Table S2. Channel and drug systems used in the REST simulations.**

| System                             | Cluster Number | Number of Frames Per Cluster | Mean Number of Sodium Ions in SF |
|------------------------------------|----------------|------------------------------|----------------------------------|
| <i>NavAb+Benzocaine - Unbiased</i> | 1              | 8661                         | 2.17±0.82                        |
|                                    | 2              | 4521                         | 2.98±0.60                        |
|                                    | 3              | 3601                         | 2.33±0.94                        |
|                                    | 4              | 3012                         | 3.15±0.83                        |
|                                    | 5              | 2178                         | 1.99±0.61                        |
|                                    | 6              | 1918                         | 2.60±0.89                        |
|                                    | 7              | 1629                         | 2.72±0.82                        |
|                                    | 8              | 1357                         | 2.29±0.70                        |
|                                    | 9              | 1252                         | 2.95±0.81                        |
|                                    | 10             | 1218                         | 2.97±0.84                        |
|                                    | leftover       | 20653                        | X                                |
| <i>NavAb+Benzocaine - REST</i>     | 1              | 7828                         | 3.05±0.77                        |
|                                    | 2              | 3640                         | 2.28±0.86                        |
|                                    | 3              | 3411                         | 2.15±0.80                        |
|                                    | 4              | 2097                         | 2.14±0.77                        |
|                                    | 5              | 1443                         | 2.08±1.00                        |
|                                    | 6              | 1261                         | 2.75±0.74                        |
|                                    | 7              | 1203                         | 1.89±0.61                        |
|                                    | 8              | 1167                         | 2.21±0.69                        |

Continued on next page



Table S3 – continued from previous page

| System                          | Cluster Number | Number of Frames Per Cluster | Mean Number of Sodium Ions in SF |
|---------------------------------|----------------|------------------------------|----------------------------------|
|                                 | 9              | 1099                         | 1.97±0.73                        |
|                                 | 10             | 1069                         | 2.20±0.70                        |
|                                 | leftover       | 25782                        | X                                |
| <i>NavMs+PF-5215786</i>         | 1              | 9688                         | 1.61±0.49                        |
|                                 | 2              | 6657                         | 1.23±0.43                        |
|                                 | 3              | 6185                         | 1.61±0.50                        |
|                                 | 4              | 2872                         | 1.36±0.48                        |
|                                 | 5              | 2618                         | 1.31±0.46                        |
|                                 | 6              | 1837                         | 1.69±0.47                        |
|                                 | 7              | 1434                         | 1.59±0.49                        |
|                                 | 8              | 1416                         | 1.66±0.47                        |
|                                 | 9              | 1076                         | 1.63±0.49                        |
|                                 | 10             | 997                          | 1.59±0.49                        |
|                                 | leftover       | 15220                        | X                                |
| <i>NavMs+charged PF-5215786</i> | 1              | 25344                        | 1.01±0.1                         |
|                                 | 2              | 5994                         | 0.96±0.37                        |
|                                 | 3              | 5505                         | 1.36±0.48                        |
|                                 | 4              | 4265                         | 1.00±0.07                        |
|                                 | 5              | 2505                         | 1.00±0.06                        |
|                                 | 6              | 1076                         | 1.04±0.19                        |
|                                 | 7              | 756                          | 1.00±0.05                        |
|                                 | 8              | 675                          | 1.08±0.27                        |
|                                 | 9              | 649                          | 0.97±0.23                        |
|                                 | 10             | 626                          | 0.78±0.46                        |
|                                 | leftover       | 2605                         | X                                |
| <i>NavMs+PF-6305591</i>         | 1              | 6516                         | 1.29±0.45                        |
|                                 | 2              | 3646                         | 1.24±0.43                        |
|                                 | 3              | 3463                         | 1.90±0.30                        |
|                                 | 4              | 3180                         | 1.96±0.23                        |
|                                 | 5              | 2263                         | 1.29±0.46                        |
|                                 | 6              | 2097                         | 1.73±0.44                        |
|                                 | 7              | 1761                         | 1.61±0.49                        |
|                                 | 8              | 125                          | 1.42±0.49                        |
|                                 | 9              | 1424                         | 1.96±0.30                        |
|                                 | 10             | 1368                         | 1.32±0.48                        |
|                                 | leftover       | 22757                        | X                                |
| <i>NavMs+charged PF-6305591</i> | 1              | 5496                         | X1.10±0.31                       |
|                                 | 2              | 3253                         | 0.99±0.23                        |
|                                 | 3              | 3194                         | 1.18±0.39                        |
|                                 | 4              | 2660                         | 1.10±0.30                        |
|                                 | 5              | 2283                         | 1.03±0.16                        |
|                                 | 6              | 2248                         | 1.00±0.05                        |
|                                 | 7              | 1830                         | 1.17±0.38                        |
|                                 | 8              | 1807                         | 1.19±0.40                        |
|                                 | 9              | 1647                         | 1.19±0.39                        |
|                                 | 10             | 1349                         | 1.14±0.35                        |
|                                 | leftover       | 24233                        | X                                |
| <i>NavMs+Lidocaine</i>          | 1              | 7170                         | 1.48±0.50                        |
|                                 | 2              | 4022                         | 1.58±0.52                        |
|                                 | 3              | 2753                         | 1.79±0.44                        |
|                                 | 4              | 2743                         | 1.75±0.50                        |
|                                 | 5              | 2277                         | 1.29±0.45                        |
|                                 | 6              | 1994                         | 1.69±0.49                        |
|                                 | 7              | 1969                         | 1.54±0.50                        |
|                                 | 8              | 1296                         | 1.47±0.50                        |
|                                 | 9              | 1168                         | 1.74±0.52                        |
|                                 | 10             | 1036                         | 1.38±0.49                        |

Continued on next page

Table S3 – continued from previous page

| System                          | Cluster Number | Number of Frames Per Cluster | Mean Number of Sodium Ions in SF |
|---------------------------------|----------------|------------------------------|----------------------------------|
|                                 | leftover       | 23572                        | X                                |
| <i>NavMs+charged Lidocaine</i>  | 1              | 10910                        | 1.02±0.14                        |
|                                 | 2              | 7855                         | 1.07±0.26                        |
|                                 | 3              | 5651                         | 1.02±0.15                        |
|                                 | 4              | 4167                         | 1.04±0.20                        |
|                                 | 5              | 3265                         | 1.04±0.20                        |
|                                 | 6              | 2115                         | 1.93±0.26                        |
|                                 | 7              | 1771                         | 1.03±0.16                        |
|                                 | 8              | 1219                         | 1.02±0.14                        |
|                                 | 9              | 1100                         | 1.03±0.16                        |
|                                 | 10             | 1050                         | 1.32±0.47                        |
|                                 | leftover       | 10897                        | X                                |
| <i>NavMs+Lamotrigine</i>        | 1              | 10997                        | 1.75±0.46                        |
|                                 | 2              | 5974                         | 1.91±0.29                        |
|                                 | 3              | 4227                         | 1.90±0.32                        |
|                                 | 4              | 3968                         | 1.72±0.46                        |
|                                 | 5              | 2440                         | 1.67±0.47                        |
|                                 | 6              | 2013                         | 1.86±0.37                        |
|                                 | 7              | 1633                         | 1.80±0.41                        |
|                                 | 8              | 1546                         | 1.95±0.25                        |
|                                 | 9              | 1372                         | 1.37±0.48                        |
|                                 | 10             | 1277                         | 1.48±0.50                        |
|                                 | leftover       | 14553                        | X                                |
| <i>NavMs+Carbamazepine</i>      | 1              | 7705                         | 2.07±0.39                        |
|                                 | 2              | 5452                         | 1.82±0.49                        |
|                                 | 3              | 2896                         | 1.63±0.56                        |
|                                 | 4              | 2815                         | 1.96±0.29                        |
|                                 | 5              | 2437                         | 1.89±0.44                        |
|                                 | 6              | 2279                         | 1.64±0.52                        |
|                                 | 7              | 1858                         | 1.60±0.53                        |
|                                 | 8              | 1662                         | 1.98±0.34                        |
|                                 | 9              | 1601                         | 1.83±0.39                        |
|                                 | 10             | 1426                         | 1.98±0.31                        |
|                                 | leftover       | 19869                        | X                                |
| <i>NavPas+Lidocaine</i>         | 1              | 10551                        | 1.4±0.6                          |
|                                 | 2              | 6778                         | 1.2±0.6                          |
|                                 | 3              | 4870                         | 1.5±0.5                          |
|                                 | 4              | 2956                         | 1.2±0.6                          |
|                                 | 5              | 2579                         | 1.5±0.6                          |
|                                 | 6              | 2292                         | 1.7±0.7                          |
|                                 | 7              | 2047                         | 1.3±0.6                          |
|                                 | 8              | 1654                         | 1.2±0.5                          |
|                                 | 9              | 1362                         | 2.0±0.3                          |
|                                 | 10             | 1255                         | 1.4±0.6                          |
|                                 | leftover       | 13656                        | X                                |
| <i>NavPas+Charged Lidocaine</i> | 1              | 21261                        | 0.4±0.5                          |
|                                 | 2              | 6286                         | 0.5±0.6                          |
|                                 | 3              | 3263                         | 0.3±0.5                          |
|                                 | 4              | 2345                         | 0.5±0.6                          |
|                                 | 5              | 2336                         | 0.6±0.7                          |
|                                 | 6              | 1908                         | 0.6±0.6                          |
|                                 | 7              | 1735                         | 0.6±0.6                          |
|                                 | 8              | 1693                         | 0.3±0.5                          |
|                                 | 9              | 1030                         | 0.3±0.5                          |
|                                 | 10             | 922                          | 0.4±0.5                          |
|                                 | leftover       | 7221                         | X                                |

Continued on next page

Table S3 – continued from previous page

| System | Cluster Number | Number of<br>Frames Per<br>Cluster | Mean Number of<br>Sodium Ions in SF |
|--------|----------------|------------------------------------|-------------------------------------|
|--------|----------------|------------------------------------|-------------------------------------|

Table S3. List of the top 10 clusters for each pore+drug simulation, along with the number of frames in each cluster and the mean number of sodium ions in the selectivity filter (with standard deviation)

**Parameters of Compounds.** All topologies were generated by CHARMM General Force Field (CGenFF) program version 1.0.0 and modified by Delin Sun.

```

# Benzocaine
#
# Topology
36 1
RESI      BNZ      0.000
GROUP
ATOM C1    CG2R61  -0.115  !
ATOM H1    HGR61   0.115  !
ATOM C2    CG2R61  -0.115  !
ATOM H2    HGR61   0.115  !
ATOM C3    CG2R61  -0.095  !
ATOM C4    CG2R61  -0.115  !
ATOM H3    HGR61   0.115  !
ATOM C5    CG2R61  -0.115  !
ATOM H4    HGR61   0.115  !
ATOM C6    CG2R61  0.249  !
ATOM N     NG2S3   -0.861  !
ATOM H5    HGP4    0.365  !
ATOM H6    HGP4    0.365  !
ATOM C7    CG202   0.726  !
ATOM O1    OG2D1   -0.551  !
ATOM O2    OG302   -0.391  !
ATOM C8    CG321   0.013  !
ATOM H7    HGA2    0.090  !
ATOM H8    HGA2    0.090  !
ATOM C9    CG331   -0.270  !
ATOM H9    HGA3    0.090  !
ATOM H10   HGA3    0.090  !
ATOM H11   HGA3    0.090  !
! Bond order
BOND H10   C9      ! 1
BOND H8    C8      ! 1
BOND H9    C9      ! 1
BOND C9    C8      ! 1
BOND C9    H11     ! 1
BOND C8    O2      ! 1
BOND C8    H7      ! 1
BOND O2    C7      ! 1
BOND H5    N       ! 1
BOND H2    C2      ! 1
BOND C7    O1      ! 2
BOND C7    C3      ! 1
BOND C2    C3      ! 1
BOND C2    C1      ! 2
BOND H6    N       ! 1
BOND C3    C4      ! 2
BOND H1    C1      ! 1
BOND C1    C6      ! 1
BOND C4    H3      ! 1
BOND C4    C5      ! 1

```

|         |    |     |    |   |
|---------|----|-----|----|---|
| BOND C6 | C5 |     | !  | 2 |
| BOND C6 | N  |     | !  | 1 |
| BOND C5 | H4 |     | !  | 1 |
| IMPR N  | H5 | H 6 | C6 |   |
| IMPR C7 | C3 | O 1 | O2 |   |

END

# Parameters

BONDS

|        |        |         |       |   |
|--------|--------|---------|-------|---|
| CG2O2  | CG2R61 | 340.897 | 1.454 | ! |
| CG2O2  | OG2D1  | 713.430 | 1.238 | ! |
| CG2O2  | OG3O2  | 420.251 | 1.337 | ! |
| CG2R61 | CG2R61 | 296.826 | 1.355 | ! |
| CG2R61 | NG2S3  | 414.059 | 1.408 | ! |
| CG2R61 | HGR61  | 370.887 | 1.085 | ! |
| CG321  | CG331  | 350.852 | 1.523 | ! |
| CG321  | OG3O2  | 328.640 | 1.427 | ! |
| CG321  | HGA2   | 364.822 | 1.085 | ! |
| CG331  | HGA3   | 405.939 | 1.095 | ! |
| NG2S3  | HGP4   | 460.285 | 1.022 | ! |

ANGLES

|        |        |        |         |         |        |           |
|--------|--------|--------|---------|---------|--------|-----------|
| CG2R61 | CG2O2  | OG2D1  | 115.338 | 125.259 | 20.00  | 2.44200 ! |
| CG2R61 | CG2O2  | OG3O2  | 113.594 | 111.696 | 20.00  | 2.36000 ! |
| OG2D1  | CG2O2  | OG3O2  | 172.080 | 123.070 | 160.00 | 2.25760 ! |
| CG2O2  | CG2R61 | CG2R61 | 105.789 | 120.000 |        | !         |
| CG2R61 | CG2R61 | CG2R61 | 189.243 | 120.156 | 35.00  | 2.41620 ! |
| CG2R61 | CG2R61 | NG2S3  | 104.758 | 120.284 |        | !         |
| CG2R61 | CG2R61 | HGR61  | 74.692  | 120.091 | 22.00  | 2.15250 ! |
| CG331  | CG321  | OG3O2  | 141.711 | 106.502 |        | !         |
| CG331  | CG321  | HGA2   | 173.176 | 112.437 | 22.53  | 2.17900 ! |
| OG3O2  | CG321  | HGA2   | 108.596 | 108.835 |        | !         |
| HGA2   | CG321  | HGA2   | 85.438  | 107.644 | 5.40   | 1.80200 ! |
| CG321  | CG331  | HGA3   | 150.388 | 110.348 | 22.53  | 2.17900 ! |
| HGA3   | CG331  | HGA3   | 62.798  | 108.547 | 5.40   | 1.80200 ! |
| CG2R61 | NG2S3  | HGP4   | 91.270  | 113.956 |        | !         |
| HGP4   | NG2S3  | HGP4   | 71.538  | 111.240 |        | !         |
| CG2O2  | OG3O2  | CG321  | 134.158 | 114.402 | 30.00  | 2.26510 ! |

DIHEDRALS

|        |        |        |        |        |   |        |   |
|--------|--------|--------|--------|--------|---|--------|---|
| OG2D1  | CG2O2  | CG2R61 | CG2R61 | 2.1330 | 2 | 180.00 | ! |
| OG3O2  | CG2O2  | CG2R61 | CG2R61 | 0.4770 | 2 | 180.00 | ! |
| OG3O2  | CG2O2  | CG2R61 | CG2R61 | 0.4590 | 4 | 180.00 | ! |
| CG2R61 | CG2O2  | OG3O2  | CG321  | 2.5060 | 2 | 180.00 | ! |
| CG2R61 | CG2O2  | OG3O2  | CG321  | 2.7590 | 3 | 0.00   | ! |
| CG2R61 | CG2O2  | OG3O2  | CG321  | 0.9580 | 4 | 0.00   | ! |
| CG2R61 | CG2O2  | OG3O2  | CG321  | 0.0670 | 6 | 180.00 | ! |
| OG2D1  | CG2O2  | OG3O2  | CG321  | 1.2410 | 2 | 180.00 | ! |
| CG2O2  | CG2R61 | CG2R61 | CG2R61 | 2.1250 | 3 | 0.00   | ! |
| CG2O2  | CG2R61 | CG2R61 | HGR61  | 1.0870 | 2 | 180.00 | ! |
| CG2R61 | CG2R61 | CG2R61 | CG2R61 | 2.9980 | 2 | 180.00 | ! |
| CG2R61 | CG2R61 | CG2R61 | NG2S3  | 2.5020 | 3 | 0.00   | ! |
| CG2R61 | CG2R61 | CG2R61 | HGR61  | 2.9160 | 2 | 180.00 | ! |
| NG2S3  | CG2R61 | CG2R61 | HGR61  | 1.0050 | 3 | 180.00 | ! |
| HGR61  | CG2R61 | CG2R61 | HGR61  | 2.9990 | 2 | 180.00 | ! |
| HGR61  | CG2R61 | CG2R61 | HGR61  | 2.4850 | 3 | 180.00 | ! |
| CG2R61 | CG2R61 | NG2S3  | HGP4   | 1.1260 | 2 | 180.00 | ! |
| OG3O2  | CG321  | CG331  | HGA3   | 0.6640 | 2 | 0.00   | ! |
| HGA2   | CG321  | CG331  | HGA3   | 0.2570 | 3 | 0.00   | ! |
| CG331  | CG321  | OG3O2  | CG2O2  | 1.6340 | 1 | 180.00 | ! |
| CG331  | CG321  | OG3O2  | CG2O2  | 0.9220 | 2 | 180.00 | ! |
| CG331  | CG321  | OG3O2  | CG2O2  | 1.3230 | 3 | 180.00 | ! |
| CG331  | CG321  | OG3O2  | CG2O2  | 0.9230 | 4 | 180.00 | ! |

|      |       |       |       |        |   |        |   |
|------|-------|-------|-------|--------|---|--------|---|
| HGA2 | CG321 | OG302 | CG202 | 0.0220 | 2 | 0.00   | ! |
| HGA2 | CG321 | OG302 | CG202 | 0.0370 | 3 | 0.00   | ! |
| HGA2 | CG321 | OG302 | CG202 | 0.3020 | 4 | 180.00 | ! |

IMPROPERS

|       |        |       |        |         |   |      |   |
|-------|--------|-------|--------|---------|---|------|---|
| CG202 | CG2R61 | OG2D1 | OG302  | 72.0000 | 0 | 0.00 | ! |
| NG2S3 | HGP4   | HGP4  | CG2R61 | -2.5000 | 0 | 0.00 | ! |

END  
RETURN

# PF-5215786

#

# Topology

36 1

RESI PF1 0.000

GROUP

|          |        |         |
|----------|--------|---------|
| ATOM C1  | CG2R61 | -0.036! |
| ATOM BR  | BRGR1  | 0.020!  |
| ATOM C2  | CG2R61 | -0.094! |
| ATOM H2  | HGR62  | 0.129!  |
| ATOM C3  | CG2R61 | -0.115! |
| ATOM H3  | HGR61  | 0.115!  |
| ATOM C4  | CG2R61 | -0.078! |
| ATOM C5  | CG2R61 | -0.115! |
| ATOM H5  | HGR61  | 0.115!  |
| ATOM C6  | CG2R61 | -0.094! |
| ATOM H6  | HGR62  | 0.129!  |
| ATOM C7  | CG321  | -0.176! |
| ATOM H71 | HGA2   | 0.090!  |
| ATOM H72 | HGA2   | 0.090!  |
| ATOM C8  | CG311  | -0.193! |
| ATOM H8  | HGA1   | 0.090!  |
| ATOM N1  | NG321  | -0.181! |
| ATOM HN1 | HGPAM2 | 0.151!  |
| ATOM HN2 | HGPAM2 | 0.151!  |
| ATOM C9  | CG2R53 | -0.012! |
| ATOM N2  | NG2R50 | -0.313! |
| ATOM C10 | CG2R51 | -0.091! |
| ATOM H10 | HGR52  | 0.144!  |
| ATOM C11 | CG2R51 | -0.154! |
| ATOM N3  | NG2R51 | 0.186!  |
| ATOM HN3 | HGP1   | 0.215!  |
| ATOM C12 | CG2R61 | 0.047!  |
| ATOM C13 | CG2R61 | -0.115! |
| ATOM H13 | HGR61  | 0.115!  |
| ATOM C14 | CG2R61 | -0.033! |
| ATOM H14 | HGR62  | 0.105!  |
| ATOM C15 | CG2R61 | 0.008!  |
| ATOM CL  | CLGR1  | -0.172! |
| ATOM C16 | CG2R61 | -0.033! |
| ATOM H16 | HGR62  | 0.105!  |
| ATOM C17 | CG2R61 | -0.115! |
| ATOM H17 | HGR61  | 0.115!  |

! Bond order

|          |     |   |   |
|----------|-----|---|---|
| BOND HN1 | N1  | ! | 1 |
| BOND H8  | C8  | ! | 1 |
| BOND H17 | C17 | ! | 1 |
| BOND N1  | C8  | ! | 1 |
| BOND N1  | HN2 | ! | 1 |
| BOND H16 | C16 | ! | 1 |

|          |     |   |   |
|----------|-----|---|---|
| BOND HN3 | N3  | ! | 1 |
| BOND C17 | C16 | ! | 1 |
| BOND C17 | C12 | ! | 2 |
| BOND C16 | C15 | ! | 2 |
| BOND C8  | C9  | ! | 1 |
| BOND C8  | C7  | ! | 1 |
| BOND N3  | C9  | ! | 1 |
| BOND N3  | C11 | ! | 1 |
| BOND C9  | N2  | ! | 2 |
| BOND C11 | C12 | ! | 1 |
| BOND C11 | C10 | ! | 2 |
| BOND C12 | C13 | ! | 1 |
| BOND C15 | CL  | ! | 1 |
| BOND C15 | C14 | ! | 1 |
| BOND H3  | C3  | ! | 1 |
| BOND N2  | C10 | ! | 1 |
| BOND C10 | H10 | ! | 1 |
| BOND C13 | C14 | ! | 2 |
| BOND C13 | H13 | ! | 1 |
| BOND C14 | H14 | ! | 1 |
| BOND H2  | C2  | ! | 1 |
| BOND H72 | C7  | ! | 1 |
| BOND C3  | C2  | ! | 1 |
| BOND C3  | C4  | ! | 2 |
| BOND C7  | C4  | ! | 1 |
| BOND C7  | H71 | ! | 1 |
| BOND C2  | C1  | ! | 2 |
| BOND C4  | C5  | ! | 1 |
| BOND C1  | BR  | ! | 1 |
| BOND C1  | C6  | ! | 1 |
| BOND C5  | C6  | ! | 2 |
| BOND C5  | H5  | ! | 1 |
| BOND C6  | H6  | ! | 1 |

END

# Parameters

BONDS

|        |        |         |       |   |
|--------|--------|---------|-------|---|
| CG2R51 | CG2R51 | 420.659 | 1.389 | ! |
| CG2R51 | CG2R61 | 357.252 | 1.459 | ! |
| CG2R51 | NG2R50 | 394.053 | 1.370 | ! |
| CG2R51 | NG2R51 | 433.025 | 1.376 | ! |
| CG2R51 | HGR52  | 391.017 | 1.083 | ! |
| CG2R53 | CG311  | 308.073 | 1.501 | ! |
| CG2R53 | NG2R50 | 469.156 | 1.332 | ! |
| CG2R53 | NG2R51 | 419.850 | 1.366 | ! |
| CG2R61 | CG2R61 | 406.299 | 1.385 | ! |
| CG2R61 | CG321  | 331.736 | 1.498 | ! |
| CG2R61 | CLGR1  | 276.071 | 1.740 | ! |
| CG2R61 | BRGR1  | 200.092 | 1.906 | ! |
| CG2R61 | HGR61  | 373.664 | 1.088 | ! |
| CG2R61 | HGR62  | 376.042 | 1.086 | ! |
| CG311  | CG321  | 293.330 | 1.546 | ! |
| CG311  | NG321  | 339.659 | 1.460 | ! |
| CG311  | HGA1   | 347.160 | 1.098 | ! |
| CG321  | HGA2   | 346.550 | 1.096 | ! |
| NG2R51 | HGP1   | 484.675 | 1.015 | ! |
| NG321  | HGPAM2 | 446.047 | 1.021 | ! |

ANGLES

|        |        |        |         |         |   |
|--------|--------|--------|---------|---------|---|
| CG2R51 | CG2R51 | CG2R61 | 27.499  | 133.048 | ! |
| CG2R51 | CG2R51 | NG2R50 | 263.766 | 110.381 | ! |
| CG2R51 | CG2R51 | NG2R51 | 276.467 | 104.009 | ! |

|        |        |        |         |          |       |            |
|--------|--------|--------|---------|----------|-------|------------|
| CG2R51 | CG2R51 | HGR52  | 63.792  | 127.307  | 15.00 | 2.215 00 ! |
| CG2R61 | CG2R51 | NG2R51 | 104.514 | 122.776! |       |            |
| NG2R50 | CG2R51 | HGR52  | 66.025  | 121.485  | 20.00 | 2.140 00 ! |
| CG311  | CG2R53 | NG2R50 | 129.590 | 124.507  |       | !          |
| CG311  | CG2R53 | NG2R51 | 156.195 | 124.492  |       | !          |
| NG2R50 | CG2R53 | NG2R51 | 228.498 | 110.711  |       | !          |
| CG2R51 | CG2R61 | CG2R61 | 117.411 | 120.711  |       | !          |
| CG2R61 | CG2R61 | CG2R61 | 88.091  | 119.989  | 35.00 | 2.416 20 ! |
| CG2R61 | CG2R61 | CG321  | 105.919 | 120.440  |       | !          |
| CG2R61 | CG2R61 | CLGR1  | 106.226 | 119.532  |       | !          |
| CG2R61 | CG2R61 | BRGR1  | 109.474 | 119.317  |       | !          |
| CG2R61 | CG2R61 | HGR61  | 72.520  | 119.524  | 22.00 | 2.152 50 ! |
| CG2R61 | CG2R61 | HGR62  | 69.218  | 120.459  | 22.00 | 2.152 50 ! |
| CG2R53 | CG311  | CG321  | 252.719 | 110.263  |       | !          |
| CG2R53 | CG311  | NG321  | 148.874 | 113.395  |       | !          |
| CG2R53 | CG311  | HGA1   | 74.644  | 108.763  |       | !          |
| CG321  | CG311  | NG321  | 162.020 | 108.551  |       | !          |
| CG321  | CG311  | HGA1   | 82.252  | 107.689  | 22.53 | 2.179 00 ! |
| NG321  | CG311  | HGA1   | 75.906  | 107.878  | 50.00 | 2.140 00 ! |
| CG2R61 | CG321  | CG311  | 265.812 | 110.311  |       | !          |
| CG2R61 | CG321  | HGA2   | 86.240  | 111.291  |       | !          |
| CG311  | CG321  | HGA2   | 80.362  | 108.165  | 22.53 | 2.179 00 ! |
| HGA2   | CG321  | HGA2   | 73.730  | 107.633  | 5.40  | 1.802 00 ! |
| CG2R51 | NG2R50 | CG2R53 | 184.088 | 105.499  |       | !          |
| CG2R51 | NG2R51 | CG2R53 | 239.308 | 108.404  |       | !          |
| CG2R51 | NG2R51 | HGP1   | 68.722  | 125.185  | 20.00 | 2.150 00 ! |
| CG2R53 | NG2R51 | HGP1   | 72.654  | 125.893  | 20.00 | 2.140 00 ! |
| CG311  | NG321  | HGPAM2 | 57.476  | 107.614  |       | !          |
| HGPAM2 | NG321  | HGPAM2 | 67.729  | 104.661  |       | !          |

#### DIHEDRALS

|        |        |        |        |        |   |          |
|--------|--------|--------|--------|--------|---|----------|
| CG2R61 | CG2R51 | CG2R51 | NG2R50 | 3.0000 | 2 | 180.00 ! |
| CG2R61 | CG2R51 | CG2R51 | HGR52  | 0.4750 | 2 | 180.00 ! |
| NG2R50 | CG2R51 | CG2R51 | NG2R51 | 1.9450 | 3 | 0.00 !   |
| NG2R50 | CG2R51 | CG2R51 | NG2R51 | 2.9930 | 6 | 180.00 ! |
| NG2R51 | CG2R51 | CG2R51 | HGR52  | 3.0000 | 3 | 0.00 !   |
| CG2R51 | CG2R51 | CG2R61 | CG2R61 | 0.4460 | 2 | 180.00 ! |
| CG2R51 | CG2R51 | CG2R61 | CG2R61 | 0.3450 | 4 | 0.00 !   |
| CG2R51 | CG2R51 | CG2R61 | CG2R61 | 0.1800 | 6 | 0.00 !   |
| NG2R51 | CG2R51 | CG2R61 | CG2R61 | 0.0000 | 1 | 0.00 !   |
| CG2R51 | CG2R51 | NG2R50 | CG2R53 | 2.1100 | 3 | 180.00 ! |
| CG2R51 | CG2R51 | NG2R50 | CG2R53 | 2.9970 | 6 | 180.00 ! |
| HGR52  | CG2R51 | NG2R50 | CG2R53 | 3.0000 | 2 | 180.00 ! |
| CG2R51 | CG2R51 | NG2R51 | CG2R53 | 2.9870 | 3 | 0.00 !   |
| CG2R51 | CG2R51 | NG2R51 | CG2R53 | 2.9400 | 6 | 180.00 ! |
| CG2R51 | CG2R51 | NG2R51 | HGP1   | 0.1700 | 2 | 180.00 ! |
| CG2R61 | CG2R51 | NG2R51 | CG2R53 | 2.4520 | 2 | 180.00 ! |
| CG2R61 | CG2R51 | NG2R51 | HGP1   | 2.6970 | 2 | 180.00 ! |
| NG2R50 | CG2R53 | CG311  | CG321  | 1.4600 | 2 | 0.00 !   |
| NG2R50 | CG2R53 | CG311  | NG321  | 1.6690 | 2 | 0.00 !   |
| NG2R50 | CG2R53 | CG311  | HGA1   | 1.2300 | 2 | 0.00 !   |
| NG2R51 | CG2R53 | CG311  | CG321  | 1.2970 | 1 | 0.00 !   |
| NG2R51 | CG2R53 | CG311  | CG321  | 1.0160 | 3 | 0.00 !   |
| NG2R51 | CG2R53 | CG311  | NG321  | 1.0590 | 2 | 180.00 ! |
| NG2R51 | CG2R53 | CG311  | NG321  | 1.3910 | 3 | 180.00 ! |
| NG2R51 | CG2R53 | CG311  | HGA1   | 0.2270 | 3 | 0.00 !   |
| CG311  | CG2R53 | NG2R50 | CG2R51 | 0.6110 | 3 | 180.00 ! |
| NG2R51 | CG2R53 | NG2R50 | CG2R51 | 3.0000 | 2 | 180.00 ! |
| CG311  | CG2R53 | NG2R51 | CG2R51 | 2.9890 | 2 | 180.00 ! |
| CG311  | CG2R53 | NG2R51 | CG2R51 | 2.7790 | 3 | 0.00 !   |
| CG311  | CG2R53 | NG2R51 | HGP1   | 0.7260 | 2 | 0.00 !   |
| NG2R50 | CG2R53 | NG2R51 | CG2R51 | 3.0000 | 2 | 180.00 ! |

|        |        |        |        |        |   |        |   |
|--------|--------|--------|--------|--------|---|--------|---|
| NG2R50 | CG2R53 | NG2R51 | HGP1   | 1.8440 | 2 | 180.00 | ! |
| CG2R51 | CG2R61 | CG2R61 | CG2R61 | 2.9650 | 3 | 0.00   | ! |
| CG2R51 | CG2R61 | CG2R61 | HGR61  | 2.3990 | 2 | 180.00 | ! |
| CG2R61 | CG2R61 | CG2R61 | CG2R61 | 3.0000 | 2 | 180.00 | ! |
| CG2R61 | CG2R61 | CG2R61 | CG321  | 1.3460 | 3 | 0.00   | ! |
| CG2R61 | CG2R61 | CG2R61 | CLGR1  | 3.0000 | 3 | 0.00   | ! |
| CG2R61 | CG2R61 | CG2R61 | BRGR1  | 3.0000 | 2 | 180.00 | ! |
| CG2R61 | CG2R61 | CG2R61 | HGR61  | 2.4250 | 2 | 180.00 | ! |
| CG2R61 | CG2R61 | CG2R61 | HGR62  | 2.8430 | 3 | 0.00   | ! |
| CG321  | CG2R61 | CG2R61 | HGR61  | 2.9990 | 2 | 180.00 | ! |
| CLGR1  | CG2R61 | CG2R61 | HGR62  | 1.2950 | 2 | 180.00 | ! |
| BRGR1  | CG2R61 | CG2R61 | HGR62  | 3.0000 | 2 | 180.00 | ! |
| HGR61  | CG2R61 | CG2R61 | HGR62  | 3.0000 | 3 | 180.00 | ! |
| CG2R61 | CG2R61 | CG321  | CG311  | 0.6600 | 3 | 0.00   | ! |
| CG2R61 | CG2R61 | CG321  | HGA2   | 0.2960 | 2 | 0.00   | ! |
| CG2R53 | CG311  | CG321  | CG2R61 | 1.0910 | 1 | 180.00 | ! |
| CG2R53 | CG311  | CG321  | HGA2   | 0.0450 | 2 | 180.00 | ! |
| NG321  | CG311  | CG321  | CG2R61 | 0.8450 | 1 | 180.00 | ! |
| NG321  | CG311  | CG321  | HGA2   | 2.9990 | 1 | 180.00 | ! |
| NG321  | CG311  | CG321  | HGA2   | 1.8280 | 2 | 180.00 | ! |
| NG321  | CG311  | CG321  | HGA2   | 0.6470 | 3 | 0.00   | ! |
| HGA1   | CG311  | CG321  | CG2R61 | 0.2750 | 3 | 180.00 | ! |
| HGA1   | CG311  | CG321  | HGA2   | 1.9770 | 1 | 180.00 | ! |
| HGA1   | CG311  | CG321  | HGA2   | 0.8460 | 2 | 180.00 | ! |
| HGA1   | CG311  | CG321  | HGA2   | 0.5260 | 3 | 0.00   | ! |
| CG2R53 | CG311  | NG321  | HGPAM2 | 0.4010 | 1 | 180.00 | ! |
| CG321  | CG311  | NG321  | HGPAM2 | 0.5080 | 1 | 0.00   | ! |
| CG321  | CG311  | NG321  | HGPAM2 | 1.1650 | 2 | 0.00   | ! |
| CG321  | CG311  | NG321  | HGPAM2 | 0.4870 | 3 | 0.00   | ! |
| CG321  | CG311  | NG321  | HGPAM2 | 0.1460 | 4 | 180.00 | ! |
| HGA1   | CG311  | NG321  | HGPAM2 | 0.3250 | 1 | 0.00   | ! |

IMPROPERS

END

RETURN

# Charged PF-5215786

#

# Topology

36 1

RESI PF1 0.000

GROUP

|          |        |        |   |
|----------|--------|--------|---|
| ATOM C1  | CG2R61 | 0.269  | ! |
| ATOM BR  | BRGR1  | -0.188 | ! |
| ATOM C2  | CG2R61 | -0.163 | ! |
| ATOM H2  | HGR62  | 0.160  | ! |
| ATOM C3  | CG2R61 | -0.115 | ! |
| ATOM H3  | HGR61  | 0.115  | ! |
| ATOM C4  | CG2R61 | 0.068  | ! |
| ATOM C5  | CG2R61 | -0.115 | ! |
| ATOM H5  | HGR61  | 0.115  | ! |
| ATOM C6  | CG2R61 | -0.163 | ! |
| ATOM H6  | HGR62  | 0.160  | ! |
| ATOM C7  | CG321  | -0.277 | ! |
| ATOM H71 | HGA2   | 0.090  | ! |
| ATOM H72 | HGA2   | 0.090  | ! |
| ATOM C8  | CG314  | -0.346 | ! |
| ATOM H8  | HGA1   | 0.090  | ! |
| ATOM N1  | NG3P3  | 0.199  | ! |
| ATOM HN1 | HGP2   | 0.255  | ! |



|          |        |        |              |
|----------|--------|--------|--------------|
| ATOM HN2 | HGP2   | 0.255  | !            |
| ATOM HN3 | HGP2   | 0.255  | !            |
| ATOM C9  | CG2R53 | -0.139 | !            |
| ATOM N2  | NG2R50 | -0.257 | !            |
| ATOM C10 | CG2R51 | -0.004 | !            |
| ATOM H10 | HGR52  | 0.163  | !            |
| ATOM C11 | CG2R51 | -0.147 | !            |
| ATOM N3  | NG2R51 | 0.041  | !            |
| ATOM HN4 | HGP1   | 0.542  | !            |
| ATOM C12 | CG2R61 | 0.025  | !            |
| ATOM C13 | CG2R61 | -0.115 | !            |
| ATOM H13 | HGR61  | 0.115  | !            |
| ATOM C14 | CG2R61 | -0.259 | !            |
| ATOM H14 | HGR62  | 0.063  | !            |
| ATOM C15 | CG2R61 | 0.473  | !            |
| ATOM CL  | CLGR1  | -0.059 | !            |
| ATOM C16 | CG2R61 | -0.259 | !            |
| ATOM H16 | HGR62  | 0.063  | !            |
| ATOM C17 | CG2R61 | -0.115 | !            |
| ATOM H17 | HGR61  | 0.115  | !            |
|          |        |        | ! Bond order |
| BOND H10 | C10    |        | ! 1          |
| BOND HN2 | N1     |        | ! 1          |
| BOND H8  | C8     |        | ! 1          |
| BOND HN3 | N1     |        | ! 1          |
| BOND C10 | N2     |        | ! 1          |
| BOND C10 | C11    |        | ! 2          |
| BOND N2  | C9     |        | ! 2          |
| BOND N1  | C8     |        | ! 1          |
| BOND N1  | HN1    |        | ! 1          |
| BOND C11 | C12    |        | ! 1          |
| BOND C11 | N3     |        | ! 1          |
| BOND C9  | C8     |        | ! 1          |
| BOND C9  | N3     |        | ! 1          |
| BOND H17 | C17    |        | ! 1          |
| BOND H3  | C3     |        | ! 1          |
| BOND C8  | C7     |        | ! 1          |
| BOND C12 | C17    |        | ! 2          |
| BOND C12 | C13    |        | ! 1          |
| BOND C17 | C16    |        | ! 1          |
| BOND H2  | C2     |        | ! 1          |
| BOND N3  | HN4    |        | ! 1          |
| BOND H13 | C13    |        | ! 1          |
| BOND C13 | C14    |        | ! 2          |
| BOND C16 | H16    |        | ! 1          |
| BOND C16 | C15    |        | ! 2          |
| BOND C14 | C15    |        | ! 1          |
| BOND C14 | H14    |        | ! 1          |
| BOND C15 | CL     |        | ! 1          |
| BOND C3  | C2     |        | ! 1          |
| BOND C3  | C4     |        | ! 2          |
| BOND C2  | C1     |        | ! 2          |
| BOND H72 | C7     |        | ! 1          |
| BOND C7  | C4     |        | ! 1          |
| BOND C7  | H71    |        | ! 1          |
| BOND C4  | C5     |        | ! 1          |
| BOND C1  | BR     |        | ! 1          |
| BOND C1  | C6     |        | ! 1          |
| BOND C5  | C6     |        | ! 2          |
| BOND C5  | H5     |        | ! 1          |
| BOND C6  | H6     |        | ! 1          |

END

# Parameters

BONDS

|        |        |         |       |   |
|--------|--------|---------|-------|---|
| CG2R51 | CG2R51 | 420.316 | 1.381 | ! |
| CG2R51 | CG2R61 | 316.533 | 1.461 | ! |
| CG2R51 | NG2R50 | 338.553 | 1.372 | ! |
| CG2R51 | NG2R51 | 357.380 | 1.389 | ! |
| CG2R51 | HGR52  | 386.738 | 1.079 | ! |
| CG2R53 | CG314  | 330.266 | 1.508 | ! |
| CG2R53 | NG2R50 | 464.892 | 1.318 | ! |
| CG2R53 | NG2R51 | 385.166 | 1.352 | ! |
| CG2R61 | CG2R61 | 433.243 | 1.383 | ! |
| CG2R61 | CG321  | 304.755 | 1.514 | ! |
| CG2R61 | CLGR1  | 251.591 | 1.746 | ! |
| CG2R61 | BRGR1  | 216.129 | 1.903 | ! |
| CG2R61 | HGR61  | 371.674 | 1.084 | ! |
| CG2R61 | HGR62  | 372.107 | 1.083 | ! |
| CG314  | CG321  | 278.396 | 1.539 | ! |
| CG314  | NG3P3  | 293.991 | 1.528 | ! |
| CG314  | HGA1   | 369.782 | 1.094 | ! |
| CG321  | HGA2   | 360.958 | 1.097 | ! |
| NG2R51 | HGP1   | 490.039 | 1.011 | ! |
| NG3P3  | HGP2   | 399.805 | 1.042 | ! |

ANGLES

|        |        |        |         |         |       |            |
|--------|--------|--------|---------|---------|-------|------------|
| CG2R51 | CG2R51 | CG2R61 | 102.816 | 132.277 |       | !          |
| CG2R51 | CG2R51 | NG2R50 | 233.158 | 110.121 |       | !          |
| CG2R51 | CG2R51 | NG2R51 | 204.644 | 104.753 |       | !          |
| CG2R51 | CG2R51 | HGR52  | 67.171  | 128.358 | 15.00 | 2.215 00 ! |
| CG2R61 | CG2R51 | NG2R51 | 95.933  | 123.111 |       | !          |
| NG2R50 | CG2R51 | HGR52  | 72.090  | 121.823 | 20.00 | 2.140 00 ! |
| CG314  | CG2R53 | NG2R50 | 164.899 | 119.519 |       | !          |
| CG314  | CG2R53 | NG2R51 | 161.059 | 129.446 |       | !          |
| NG2R50 | CG2R53 | NG2R51 | 262.891 | 111.234 |       | !          |
| CG2R51 | CG2R61 | CG2R61 | 98.711  | 120.508 |       | !          |
| CG2R61 | CG2R61 | CG2R61 | 126.378 | 119.105 | 35.00 | 2.416 20 ! |
| CG2R61 | CG2R61 | CG321  | 99.288  | 120.770 |       | !          |
| CG2R61 | CG2R61 | CLGR1  | 116.846 | 119.639 |       | !          |
| CG2R61 | CG2R61 | BRGR1  | 107.584 | 119.665 |       | !          |
| CG2R61 | CG2R61 | HGR61  | 73.202  | 119.661 | 22.00 | 2.152 50 ! |
| CG2R61 | CG2R61 | HGR62  | 68.850  | 120.700 | 22.00 | 2.152 50 ! |
| CG2R53 | CG314  | CG321  | 117.474 | 116.912 |       | !          |
| CG2R53 | CG314  | NG3P3  | 209.718 | 101.716 | 35.00 | 2.101 00 ! |
| CG2R53 | CG314  | HGA1   | 68.243  | 110.835 |       | !          |
| CG321  | CG314  | NG3P3  | 99.123  | 111.155 |       | !          |
| CG321  | CG314  | HGA1   | 66.543  | 109.074 | 22.53 | 2.179 00 ! |
| NG3P3  | CG314  | HGA1   | 77.063  | 106.505 |       | !          |
| CG2R61 | CG321  | CG314  | 83.350  | 112.061 |       | !          |
| CG2R61 | CG321  | HGA2   | 79.923  | 110.755 |       | !          |
| CG314  | CG321  | HGA2   | 66.866  | 108.508 | 22.53 | 2.179 00 ! |
| HGA2   | CG321  | HGA2   | 51.902  | 107.578 | 5.40  | 1.802 00 ! |
| CG2R51 | NG2R50 | CG2R53 | 260.524 | 106.297 |       | !          |
| CG2R51 | NG2R51 | CG2R53 | 192.783 | 107.639 |       | !          |
| CG2R51 | NG2R51 | HGP1   | 64.592  | 126.011 | 20.00 | 2.150 00 ! |
| CG2R53 | NG2R51 | HGP1   | 74.708  | 125.979 | 20.00 | 2.140 00 ! |
| CG314  | NG3P3  | HGP2   | 79.877  | 109.051 | 20.00 | 2.074 00 ! |
| HGP2   | NG3P3  | HGP2   | 72.453  | 109.735 |       | !          |

DIHEDRALS

|        |        |        |        |        |   |        |   |
|--------|--------|--------|--------|--------|---|--------|---|
| CG2R61 | CG2R51 | CG2R51 | NG2R50 | 3.0000 | 3 | 0.00   | ! |
| CG2R61 | CG2R51 | CG2R51 | HGR52  | 0.5440 | 2 | 180.00 | ! |
| NG2R50 | CG2R51 | CG2R51 | NG2R51 | 2.9760 | 3 | 0.00   | ! |

|        |        |        |        |        |   |        |   |
|--------|--------|--------|--------|--------|---|--------|---|
| NG2R50 | CG2R51 | CG2R51 | NG2R51 | 1.0360 | 6 | 180.00 | ! |
| NG2R51 | CG2R51 | CG2R51 | HGR52  | 3.0000 | 3 | 0.00   | ! |
| CG2R51 | CG2R51 | CG2R61 | CG2R61 | 0.1080 | 2 | 180.00 | ! |
| NG2R51 | CG2R51 | CG2R61 | CG2R61 | 1.6750 | 2 | 180.00 | ! |
| CG2R51 | CG2R51 | NG2R50 | CG2R53 | 0.7210 | 3 | 180.00 | ! |
| CG2R51 | CG2R51 | NG2R50 | CG2R53 | 3.0000 | 6 | 180.00 | ! |
| HGR52  | CG2R51 | NG2R50 | CG2R53 | 3.0000 | 2 | 180.00 | ! |
| CG2R51 | CG2R51 | NG2R51 | CG2R53 | 3.0000 | 3 | 180.00 | ! |
| CG2R51 | CG2R51 | NG2R51 | CG2R53 | 2.6210 | 6 | 180.00 | ! |
| CG2R51 | CG2R51 | NG2R51 | HGP1   | 0.7540 | 2 | 0.00   | ! |
| CG2R61 | CG2R51 | NG2R51 | CG2R53 | 1.3490 | 2 | 180.00 | ! |
| CG2R61 | CG2R51 | NG2R51 | HGP1   | 3.0000 | 2 | 180.00 | ! |
| NG2R50 | CG2R53 | CG314  | CG321  | 1.2720 | 1 | 180.00 | ! |
| NG2R50 | CG2R53 | CG314  | CG321  | 0.2920 | 3 | 0.00   | ! |
| NG2R50 | CG2R53 | CG314  | NG3P3  | 3.0000 | 2 | 180.00 | ! |
| NG2R50 | CG2R53 | CG314  | NG3P3  | 1.8620 | 3 | 180.00 | ! |
| NG2R50 | CG2R53 | CG314  | HGA1   | 0.7030 | 2 | 0.00   | ! |
| NG2R51 | CG2R53 | CG314  | CG321  | 1.0990 | 1 | 0.00   | ! |
| NG2R51 | CG2R53 | CG314  | NG3P3  | 3.0000 | 2 | 0.00   | ! |
| NG2R51 | CG2R53 | CG314  | NG3P3  | 1.6010 | 3 | 0.00   | ! |
| NG2R51 | CG2R53 | CG314  | HGA1   | 0.8270 | 2 | 180.00 | ! |
| CG314  | CG2R53 | NG2R50 | CG2R51 | 3.0000 | 3 | 0.00   | ! |
| NG2R51 | CG2R53 | NG2R50 | CG2R51 | 2.9590 | 2 | 180.00 | ! |
| CG314  | CG2R53 | NG2R51 | CG2R51 | 1.1340 | 2 | 0.00   | ! |
| CG314  | CG2R53 | NG2R51 | HGP1   | 0.5270 | 2 | 180.00 | ! |
| NG2R50 | CG2R53 | NG2R51 | CG2R51 | 3.0000 | 1 | 180.00 | ! |
| NG2R50 | CG2R53 | NG2R51 | HGP1   | 2.4240 | 1 | 0.00   | ! |
| CG2R51 | CG2R61 | CG2R61 | CG2R61 | 3.0000 | 3 | 0.00   | ! |
| CG2R51 | CG2R61 | CG2R61 | HGR61  | 3.0000 | 2 | 180.00 | ! |
| CG2R61 | CG2R61 | CG2R61 | CG2R61 | 0.2530 | 2 | 0.00   | ! |
| CG2R61 | CG2R61 | CG2R61 | CG321  | 2.5130 | 3 | 0.00   | ! |
| CG2R61 | CG2R61 | CG2R61 | CLGR1  | 3.0000 | 3 | 0.00   | ! |
| CG2R61 | CG2R61 | CG2R61 | BRGR1  | 2.8490 | 3 | 0.00   | ! |
| CG2R61 | CG2R61 | CG2R61 | HGR61  | 2.2770 | 3 | 0.00   | ! |
| CG2R61 | CG2R61 | CG2R61 | HGR62  | 2.8660 | 3 | 0.00   | ! |
| CG321  | CG2R61 | CG2R61 | HGR61  | 2.6880 | 2 | 180.00 | ! |
| CLGR1  | CG2R61 | CG2R61 | HGR62  | 3.0000 | 2 | 180.00 | ! |
| BRGR1  | CG2R61 | CG2R61 | HGR62  | 3.0000 | 3 | 180.00 | ! |
| HGR61  | CG2R61 | CG2R61 | HGR62  | 3.0000 | 3 | 180.00 | ! |
| CG2R61 | CG2R61 | CG321  | CG314  | 0.5190 | 2 | 180.00 | ! |
| CG2R61 | CG2R61 | CG321  | HGA2   | 0.4660 | 2 | 180.00 | ! |
| CG2R53 | CG314  | CG321  | CG2R61 | 1.2130 | 1 | 0.00   | ! |
| CG2R53 | CG314  | CG321  | CG2R61 | 0.9860 | 3 | 0.00   | ! |
| CG2R53 | CG314  | CG321  | HGA2   | 0.0940 | 2 | 180.00 | ! |
| NG3P3  | CG314  | CG321  | CG2R61 | 1.0650 | 1 | 180.00 | ! |
| NG3P3  | CG314  | CG321  | HGA2   | 0.2500 | 2 | 180.00 | ! |
| HGA1   | CG314  | CG321  | CG2R61 | 0.8420 | 1 | 0.00   | ! |
| HGA1   | CG314  | CG321  | HGA2   | 0.4030 | 2 | 180.00 | ! |
| CG2R53 | CG314  | NG3P3  | HGP2   | 3.0000 | 1 | 180.00 | ! |
| CG321  | CG314  | NG3P3  | HGP2   | 1.4790 | 2 | 0.00   | ! |
| HGA1   | CG314  | NG3P3  | HGP2   | 0.1170 | 3 | 180.00 | ! |

IMPROPERS

|       |        |       |        |         |   |      |   |
|-------|--------|-------|--------|---------|---|------|---|
| CG202 | CG2R61 | OG2D1 | OG302  | 72.0000 | 0 | 0.00 | ! |
| NG2S3 | HGP4   | HGP4  | CG2R61 | -2.5000 | 0 | 0.00 | ! |

END  
RETURN

# PF-6305591  
#

# Topology

```
36 1
RESI          PF3          0.000
GROUP
ATOM CA       CG301        0.018  !
ATOM CB       CG331       -0.288  !
ATOM HB1      HGA3         0.090  !
ATOM HB2      HGA3         0.090  !
ATOM HB3      HGA3         0.090  !
ATOM CC       CG331       -0.288  !
ATOM HC1      HGA3         0.090  !
ATOM HC2      HGA3         0.090  !
ATOM HC3      HGA3         0.090  !
ATOM CD       CG331       -0.288  !
ATOM HD1      HGA3         0.090  !
ATOM HD2      HGA3         0.090  !
ATOM HD3      HGA3         0.090  !
ATOM CE       CG2R61        0.021  !
ATOM CF       CG2R61       -0.040  !
ATOM HF       HGR61         0.115  !
ATOM CG       CG2RC0        0.032  !
ATOM CH       CG2RC0       -0.058  !
ATOM CI       CG2R61       -0.116  !
ATOM HI       HGR61         0.115  !
ATOM CJ       CG2R61       -0.115  !
ATOM HJ       HGR61         0.115  !
ATOM N1       NG2R50       -0.300  !
ATOM NK       CG2R53       -0.003  !
ATOM N2       NG2R51       -0.012  !
ATOM H1       HGP1          0.255  !
ATOM CL       CG311       -0.112  !
ATOM HL       HGA1          0.090  !
ATOM N3       NG321       -0.194  !
ATOM H2       HGPAM2        0.174  !
ATOM H3       HGPAM2        0.174  !
ATOM CM       CG311       -0.072  !
ATOM HM       HGA1          0.090  !
ATOM CN       CG331       -0.279  !
ATOM HN1      HGA3          0.090  !
ATOM HN2      HGA3          0.090  !
ATOM HN3      HGA3          0.090  !
ATOM CO       CG201       -0.092  !
ATOM O        OG2D1       -0.458  !
ATOM N4       NG2S2         0.234  !
ATOM H4       HGP1          0.101  !
ATOM H5       HGP1          0.101  !
                                     ! Bond order
BOND HN3      CN            ! 1
BOND HN2      CN            ! 1
BOND HI       CI            ! 1
BOND HD1      CD            ! 1
BOND HN1      CN            ! 1
BOND CN       CM            ! 1
BOND HJ       CJ            ! 1
BOND HD2      CD            ! 1
BOND CI       CJ            ! 1
BOND CI       CH            ! 2
BOND O        CO            ! 2
BOND H1       N2            ! 1
BOND CD       HD3          ! 1
BOND CD       CA            ! 1
```

|          |     |     |   |
|----------|-----|-----|---|
| BOND CJ  | CE  | !   | 2 |
| BOND N2  | CH  | !   | 1 |
| BOND N2  | CK  | !   | 1 |
| BOND CH  | CG  | !   | 1 |
| BOND CM  | CO  | !   | 1 |
| BOND CM  | HM  | !   | 1 |
| BOND CM  | CL  | !   | 1 |
| BOND CO  | N4  | !   | 1 |
| BOND HC1 | CC  | !   | 1 |
| BOND CE  | CA  | !   | 1 |
| BOND CE  | CF  | !   | 1 |
| BOND CA  | CC  | !   | 1 |
| BOND CA  | CB  | !   | 1 |
| BOND CK  | CL  | !   | 1 |
| BOND CK  | N1  | !   | 2 |
| BOND HL  | CL  | !   | 1 |
| BOND CG  | CF  | !   | 2 |
| BOND CG  | N1  | !   | 1 |
| BOND CL  | N3  | !   | 1 |
| BOND CF  | HF  | !   | 1 |
| BOND CC  | HC2 | !   | 1 |
| BOND CC  | HC3 | !   | 1 |
| BOND N4  | H5  | !   | 1 |
| BOND N4  | H4  | !   | 1 |
| BOND HB1 | CB  | !   | 1 |
| BOND CB  | HB3 | !   | 1 |
| BOND CB  | HB2 | !   | 1 |
| BOND N3  | H2  | !   | 1 |
| BOND N3  | H3  | !   | 1 |
| IMPR CO  | CM  | N 4 | 0 |

END

# Parameters

BONDS

|        |        |         |       |   |
|--------|--------|---------|-------|---|
| CG201  | CG311  | 280.817 | 1.552 | ! |
| CG201  | NG2S2  | 483.853 | 1.353 | ! |
| CG201  | OG2D1  | 806.694 | 1.229 | ! |
| CG2R53 | CG311  | 307.242 | 1.505 | ! |
| CG2R53 | NG2R50 | 578.916 | 1.308 | ! |
| CG2R53 | NG2R51 | 438.848 | 1.383 | ! |
| CG2R61 | CG2R61 | 468.675 | 1.397 | ! |
| CG2R61 | CG2RC0 | 189.274 | 1.394 | ! |
| CG2R61 | CG301  | 284.947 | 1.532 | ! |
| CG2R61 | HGR61  | 358.125 | 1.083 | ! |
| CG2RC0 | CG2RC0 | 197.363 | 1.407 | ! |
| CG2RC0 | NG2R50 | 107.818 | 1.393 | ! |
| CG2RC0 | NG2R51 | 461.817 | 1.385 | ! |
| CG301  | CG331  | 284.625 | 1.544 | ! |
| CG311  | CG311  | 284.136 | 1.555 | ! |
| CG311  | CG331  | 293.337 | 1.527 | ! |
| CG311  | NG321  | 338.427 | 1.478 | ! |
| CG311  | HGA1   | 341.851 | 1.099 | ! |
| CG331  | HGA3   | 358.269 | 1.092 | ! |
| NG2R51 | HGP1   | 481.999 | 1.008 | ! |
| NG2S2  | HGP1   | 471.056 | 1.012 | ! |
| NG321  | HGPAM2 | 453.708 | 1.021 | ! |

ANGLES

|       |        |        |         |         |       |         |
|-------|--------|--------|---------|---------|-------|---------|
| CG311 | CG201  | NG2S2  | 150.731 | 115.219 | 50.00 | 2.45000 |
| CG311 | CG201  | OG2D1  | 134.096 | 121.575 |       | !       |
| NG2S2 | CG201  | OG2D1  | 130.367 | 123.169 | 50.00 | 2.37000 |
| CG311 | CG2R53 | NG2R50 | 108.803 | 123.587 |       | !       |

|        |        |        |         |         |       |         |   |
|--------|--------|--------|---------|---------|-------|---------|---|
| CG311  | CG2R53 | NG2R51 | 105.026 | 123.679 |       |         | ! |
| NG2R50 | CG2R53 | NG2R51 | 295.471 | 112.858 |       |         | ! |
| CG2R61 | CG2R61 | CG2R61 | 282.380 | 120.862 | 35.00 | 2.41620 |   |
| CG2R61 | CG2R61 | CG2RC0 | 286.203 | 118.131 |       |         | ! |
| CG2R61 | CG2R61 | CG301  | 161.572 | 120.601 |       |         | ! |
| CG2R61 | CG2R61 | HGR61  | 79.164  | 119.886 | 22.00 | 2.15250 |   |
| CG2RC0 | CG2R61 | HGR61  | 74.394  | 120.337 | 22.00 | 2.14600 |   |
| CG2R61 | CG2RC0 | CG2RC0 | 290.038 | 121.044 |       |         | ! |
| CG2R61 | CG2RC0 | NG2R50 | 290.611 | 129.547 |       |         | ! |
| CG2R61 | CG2RC0 | NG2R51 | 290.985 | 133.649 |       |         | ! |
| CG2RC0 | CG2RC0 | NG2R50 | 285.471 | 110.175 |       |         | ! |
| CG2RC0 | CG2RC0 | NG2R51 | 291.356 | 104.604 |       |         | ! |
| CG2R61 | CG301  | CG331  | 115.817 | 110.457 |       |         | ! |
| CG331  | CG301  | CG331  | 105.368 | 108.549 | 11.16 | 2.56100 |   |
| CG201  | CG311  | CG311  | 155.388 | 111.941 |       |         | ! |
| CG201  | CG311  | CG331  | 134.684 | 109.451 |       |         | ! |
| CG201  | CG311  | HGA1   | 57.492  | 107.296 |       |         | ! |
| CG2R53 | CG311  | CG311  | 107.959 | 112.155 |       |         | ! |
| CG2R53 | CG311  | NG321  | 125.408 | 110.393 |       |         | ! |
| CG2R53 | CG311  | HGA1   | 70.423  | 108.410 |       |         | ! |
| CG311  | CG311  | CG331  | 121.480 | 113.431 | 8.00  | 2.56100 |   |
| CG311  | CG311  | NG321  | 129.345 | 109.949 |       |         | ! |
| CG311  | CG311  | HGA1   | 69.019  | 106.893 | 22.53 | 2.17900 |   |
| CG331  | CG311  | HGA1   | 65.155  | 108.502 | 22.53 | 2.17900 |   |
| NG321  | CG311  | HGA1   | 83.502  | 107.860 | 50.00 | 2.14000 |   |
| CG301  | CG331  | HGA3   | 57.056  | 111.132 | 22.53 | 2.17900 |   |
| CG311  | CG331  | HGA3   | 64.368  | 110.741 | 22.53 | 2.17900 |   |
| HGA3   | CG331  | HGA3   | 54.065  | 107.850 | 5.40  | 1.80200 |   |
| CG2R53 | NG2R50 | CG2RC0 | 284.618 | 105.281 |       |         | ! |
| CG2R53 | NG2R51 | CG2RC0 | 288.701 | 107.126 |       |         | ! |
| CG2R53 | NG2R51 | HGP1   | 61.427  | 126.022 | 20.00 | 2.14000 |   |
| CG2RC0 | NG2R51 | HGP1   | 69.159  | 126.794 |       |         | ! |
| CG201  | NG2S2  | HGP1   | 73.183  | 117.783 |       |         | ! |
| HGP1   | NG2S2  | HGP1   | 59.747  | 121.870 |       |         | ! |
| CG311  | NG321  | HGPAM2 | 65.900  | 107.843 |       |         | ! |
| HGPAM2 | NG321  | HGPAM2 | 62.029  | 104.986 |       |         | ! |

#### DIHEDRALS

|        |        |       |       |        |   |        |   |
|--------|--------|-------|-------|--------|---|--------|---|
| NG2S2  | CG201  | CG311 | CG311 | 0.4310 | 2 | 0.00   | ! |
| NG2S2  | CG201  | CG311 | CG331 | 0.8550 | 1 | 0.00   | ! |
| NG2S2  | CG201  | CG311 | HGA1  | 0.8240 | 1 | 180.00 | ! |
| NG2S2  | CG201  | CG311 | HGA1  | 0.5390 | 2 | 0.00   | ! |
| NG2S2  | CG201  | CG311 | HGA1  | 0.8110 | 3 | 180.00 | ! |
| OG2D1  | CG201  | CG311 | CG311 | 0.6010 | 1 | 0.00   | ! |
| OG2D1  | CG201  | CG311 | CG311 | 2.2110 | 2 | 180.00 | ! |
| OG2D1  | CG201  | CG311 | CG311 | 1.6010 | 3 | 180.00 | ! |
| OG2D1  | CG201  | CG311 | CG331 | 2.4150 | 1 | 180.00 | ! |
| OG2D1  | CG201  | CG311 | CG331 | 2.1970 | 2 | 180.00 | ! |
| OG2D1  | CG201  | CG311 | CG331 | 1.4010 | 3 | 0.00   | ! |
| OG2D1  | CG201  | CG311 | CG331 | 0.5780 | 4 | 180.00 | ! |
| OG2D1  | CG201  | CG311 | HGA1  | 1.0290 | 3 | 0.00   | ! |
| CG311  | CG201  | NG2S2 | HGP1  | 0.2820 | 2 | 180.00 | ! |
| OG2D1  | CG201  | NG2S2 | HGP1  | 1.2630 | 2 | 0.00   | ! |
| NG2R50 | CG2R53 | CG311 | CG311 | 1.0320 | 2 | 180.00 | ! |
| NG2R50 | CG2R53 | CG311 | NG321 | 0.5410 | 3 | 0.00   | ! |
| NG2R50 | CG2R53 | CG311 | HGA1  | 1.3610 | 1 | 0.00   | ! |
| NG2R50 | CG2R53 | CG311 | HGA1  | 1.8350 | 3 | 180.00 | ! |
| NG2R51 | CG2R53 | CG311 | CG311 | 1.6130 | 2 | 0.00   | ! |
| NG2R51 | CG2R53 | CG311 | NG321 | 2.4100 | 1 | 180.00 | ! |
| NG2R51 | CG2R53 | CG311 | NG321 | 0.6840 | 2 | 180.00 | ! |
| NG2R51 | CG2R53 | CG311 | NG321 | 1.3620 | 3 | 180.00 | ! |
| NG2R51 | CG2R53 | CG311 | HGA1  | 1.7570 | 1 | 180.00 | ! |

|        |        |        |        |        |   |        |   |
|--------|--------|--------|--------|--------|---|--------|---|
| CG311  | CG2R53 | NG2R50 | CG2RC0 | 0.0710 | 3 | 0.00   | ! |
| NG2R51 | CG2R53 | NG2R50 | CG2RC0 | 3.0000 | 3 | 180.00 | ! |
| CG311  | CG2R53 | NG2R51 | CG2RC0 | 2.7230 | 3 | 0.00   | ! |
| CG311  | CG2R53 | NG2R51 | HGP1   | 2.3470 | 2 | 180.00 | ! |
| NG2R50 | CG2R53 | NG2R51 | CG2RC0 | 3.0000 | 3 | 180.00 | ! |
| NG2R50 | CG2R53 | NG2R51 | CG2RC0 | 3.0000 | 4 | 180.00 | ! |
| NG2R50 | CG2R53 | NG2R51 | HGP1   | 1.8880 | 1 | 180.00 | ! |
| CG2R61 | CG2R61 | CG2R61 | CG2R61 | 2.8380 | 2 | 180.00 | ! |
| CG2R61 | CG2R61 | CG2R61 | CG2RC0 | 2.9990 | 3 | 180.00 | ! |
| CG2R61 | CG2R61 | CG2R61 | CG301  | 3.0000 | 2 | 0.00   | ! |
| CG2R61 | CG2R61 | CG2R61 | HGR61  | 2.9860 | 1 | 0.00   | ! |
| CG2RC0 | CG2R61 | CG2R61 | CG301  | 3.0000 | 3 | 0.00   | ! |
| CG2RC0 | CG2R61 | CG2R61 | HGR61  | 3.0000 | 3 | 0.00   | ! |
| CG301  | CG2R61 | CG2R61 | HGR61  | 3.0000 | 3 | 180.00 | ! |
| CG301  | CG2R61 | CG2R61 | HGR61  | 0.6280 | 4 | 180.00 | ! |
| HGR61  | CG2R61 | CG2R61 | HGR61  | 2.9990 | 1 | 180.00 | ! |
| CG2R61 | CG2R61 | CG2RC0 | CG2RC0 | 1.4590 | 1 | 0.00   | ! |
| CG2R61 | CG2R61 | CG2RC0 | NG2R50 | 2.8520 | 1 | 180.00 | ! |
| CG2R61 | CG2R61 | CG2RC0 | NG2R51 | 2.8840 | 1 | 0.00   | ! |
| HGR61  | CG2R61 | CG2RC0 | CG2RC0 | 2.6670 | 3 | 0.00   | ! |
| HGR61  | CG2R61 | CG2RC0 | NG2R50 | 2.9530 | 1 | 180.00 | ! |
| HGR61  | CG2R61 | CG2RC0 | NG2R51 | 2.0760 | 3 | 180.00 | ! |
| CG2R61 | CG2R61 | CG301  | CG331  | 0.4380 | 3 | 180.00 | ! |
| CG2R61 | CG2RC0 | CG2RC0 | CG2R61 | 2.1380 | 1 | 180.00 | ! |
| CG2R61 | CG2RC0 | CG2RC0 | NG2R50 | 2.9970 | 3 | 0.00   | ! |
| CG2R61 | CG2RC0 | CG2RC0 | NG2R50 | 1.5690 | 4 | 180.00 | ! |
| CG2R61 | CG2RC0 | CG2RC0 | NG2R51 | 2.2120 | 2 | 0.00   | ! |
| NG2R50 | CG2RC0 | CG2RC0 | NG2R51 | 3.0000 | 3 | 180.00 | ! |
| NG2R50 | CG2RC0 | CG2RC0 | NG2R51 | 2.9990 | 4 | 180.00 | ! |
| CG2R61 | CG2RC0 | NG2R50 | CG2R53 | 3.0000 | 3 | 0.00   | ! |
| CG2R61 | CG2RC0 | NG2R50 | CG2R53 | 2.1990 | 4 | 180.00 | ! |
| CG2RC0 | CG2RC0 | NG2R50 | CG2R53 | 2.9990 | 2 | 180.00 | ! |
| CG2R61 | CG2RC0 | NG2R51 | CG2R53 | 3.0000 | 2 | 0.00   | ! |
| CG2R61 | CG2RC0 | NG2R51 | HGP1   | 1.3750 | 1 | 0.00   | ! |
| CG2RC0 | CG2RC0 | NG2R51 | CG2R53 | 3.0000 | 2 | 0.00   | ! |
| CG2RC0 | CG2RC0 | NG2R51 | HGP1   | 0.3840 | 1 | 0.00   | ! |
| CG2R61 | CG301  | CG331  | HGA3   | 2.9890 | 2 | 180.00 | ! |
| CG331  | CG301  | CG331  | HGA3   | 0.2670 | 3 | 0.00   | ! |
| CG201  | CG311  | CG311  | CG2R53 | 3.0000 | 1 | 0.00   | ! |
| CG201  | CG311  | CG311  | CG2R53 | 1.4220 | 3 | 0.00   | ! |
| CG201  | CG311  | CG311  | NG321  | 1.6300 | 1 | 180.00 | ! |
| CG201  | CG311  | CG311  | HGA1   | 1.0100 | 1 | 180.00 | ! |
| CG201  | CG311  | CG311  | HGA1   | 0.7260 | 2 | 180.00 | ! |
| CG201  | CG311  | CG311  | HGA1   | 0.3510 | 3 | 180.00 | ! |
| CG2R53 | CG311  | CG311  | CG331  | 1.6880 | 1 | 0.00   | ! |
| CG2R53 | CG311  | CG311  | HGA1   | 1.7360 | 1 | 180.00 | ! |
| CG2R53 | CG311  | CG311  | HGA1   | 0.1100 | 2 | 0.00   | ! |
| CG2R53 | CG311  | CG311  | HGA1   | 1.1910 | 3 | 0.00   | ! |
| CG331  | CG311  | CG311  | NG321  | 1.7010 | 1 | 180.00 | ! |
| CG331  | CG311  | CG311  | NG321  | 1.8370 | 2 | 0.00   | ! |
| CG331  | CG311  | CG311  | NG321  | 0.5720 | 3 | 0.00   | ! |
| CG331  | CG311  | CG311  | HGA1   | 0.9340 | 1 | 180.00 | ! |
| NG321  | CG311  | CG311  | HGA1   | 0.3670 | 3 | 180.00 | ! |
| NG321  | CG311  | CG311  | HGA1   | 0.6820 | 4 | 180.00 | ! |
| HGA1   | CG311  | CG311  | HGA1   | 1.4960 | 3 | 180.00 | ! |
| CG201  | CG311  | CG331  | HGA3   | 2.9780 | 2 | 0.00   | ! |
| CG311  | CG311  | CG331  | HGA3   | 0.1110 | 3 | 0.00   | ! |
| HGA1   | CG311  | CG331  | HGA3   | 0.0280 | 3 | 0.00   | ! |
| CG2R53 | CG311  | NG321  | HGPAM2 | 1.1340 | 2 | 0.00   | ! |
| CG311  | CG311  | NG321  | HGPAM2 | 1.3740 | 3 | 180.00 | ! |
| HGA1   | CG311  | NG321  | HGPAM2 | 0.0850 | 1 | 0.00   | ! |

|           |       |       |        |          |   |        |   |
|-----------|-------|-------|--------|----------|---|--------|---|
| HGA1      | CG311 | NG321 | HGPAM2 | 2.5840   | 2 | 180.00 | ! |
| HGA1      | CG311 | NG321 | HGPAM2 | 1.0110   | 3 | 0.00   | ! |
| IMPROPERS |       |       |        |          |   |        |   |
| CG201     | CG311 | NG2S2 | OG2D1  | 120.0000 | 0 | 0.00   | ! |

END  
RETURN

# Charged PF-6305591

#

# Topology

36 1

|          |        |        |              |
|----------|--------|--------|--------------|
| RESI     | PF3    | 0.000  |              |
| GROUP    |        |        |              |
| ATOM CA  | CG301  | 0.064  | !            |
| ATOM CB  | CG331  | -0.266 | !            |
| ATOM HB1 | HGA3   | 0.090  | !            |
| ATOM HB2 | HGA3   | 0.090  | !            |
| ATOM HB3 | HGA3   | 0.090  | !            |
| ATOM CC  | CG331  | -0.266 | !            |
| ATOM HC1 | HGA3   | 0.090  | !            |
| ATOM HC2 | HGA3   | 0.090  | !            |
| ATOM HC3 | HGA3   | 0.090  | !            |
| ATOM CD  | CG331  | -0.266 | !            |
| ATOM HD1 | HGA3   | 0.090  | !            |
| ATOM HD2 | HGA3   | 0.090  | !            |
| ATOM HD3 | HGA3   | 0.090  | !            |
| ATOM CE  | CG2R61 | 0.031  | !            |
| ATOM CF  | CG2R61 | -0.063 | !            |
| ATOM HF  | HGR61  | 0.115  | !            |
| ATOM CG  | CG2RC0 | -0.019 | !            |
| ATOM CH  | CG2RC0 | 0.003  | !            |
| ATOM CI  | CG2R61 | -0.026 | !            |
| ATOM HI  | HGR61  | 0.115  | !            |
| ATOM CJ  | CG2R61 | -0.115 | !            |
| ATOM HJ  | HGR61  | 0.115  | !            |
| ATOM N1  | NG2R52 | -0.095 | !            |
| ATOM H6  | HGP2   | 0.335  | !            |
| ATOM CK  | CG2R53 | 0.041  | !            |
| ATOM N2  | NG2R52 | -0.053 | !            |
| ATOM H1  | HGP2   | 0.261  | !            |
| ATOM CL  | CG311  | -0.114 | !            |
| ATOM HL  | HGA1   | 0.090  | !            |
| ATOM N3  | NG321  | -0.209 | !            |
| ATOM H2  | HGPAM2 | 0.247  | !            |
| ATOM H3  | HGPAM2 | 0.247  | !            |
| ATOM CM  | CG311  | -0.090 | !            |
| ATOM HM  | HGA1   | 0.090  | !            |
| ATOM CN  | CG331  | -0.192 | !            |
| ATOM HN1 | HGA3   | 0.090  | !            |
| ATOM HN2 | HGA3   | 0.090  | !            |
| ATOM HN3 | HGA3   | 0.090  | !            |
| ATOM CO  | CG201  | -0.051 | !            |
| ATOM O   | OG2D1  | -0.283 | !            |
| ATOM N4  | NG2S2  | -0.126 | !            |
| ATOM H4  | HGP1   | 0.200  | !            |
| ATOM H5  | HGP1   | 0.200  | !            |
|          |        |        | ! Bond order |
| BOND HB1 | CB     |        | ! 1          |
| BOND HD2 | CD     |        | ! 1          |



|          |     |     |   |
|----------|-----|-----|---|
| BOND H3  | N3  | !   | 1 |
| BOND HL  | CL  | !   | 1 |
| BOND H6  | N1  | !   | 1 |
| BOND HB3 | CB  | !   | 1 |
| BOND HF  | CF  | !   | 1 |
| BOND HD3 | CD  | !   | 1 |
| BOND CB  | HB2 | !   | 1 |
| BOND CB  | CA  | !   | 1 |
| BOND CD  | HD1 | !   | 1 |
| BOND CD  | CA  | !   | 1 |
| BOND H4  | N4  | !   | 1 |
| BOND N3  | CL  | !   | 1 |
| BOND N3  | H2  | !   | 1 |
| BOND N1  | CG  | !   | 1 |
| BOND N1  | CK  | !   | 1 |
| BOND H5  | N4  | !   | 1 |
| BOND CF  | CG  | !   | 1 |
| BOND CF  | CE  | !   | 2 |
| BOND N4  | CO  | !   | 1 |
| BOND CL  | CK  | !   | 1 |
| BOND CL  | CM  | !   | 1 |
| BOND CG  | CH  | !   | 2 |
| BOND CK  | N2  | !   | 2 |
| BOND CA  | CE  | !   | 1 |
| BOND CA  | CC  | !   | 1 |
| BOND CE  | CJ  | !   | 1 |
| BOND CH  | N2  | !   | 1 |
| BOND CH  | CI  | !   | 1 |
| BOND N2  | H1  | !   | 1 |
| BOND CO  | CM  | !   | 1 |
| BOND CO  | O   | !   | 2 |
| BOND CJ  | CI  | !   | 2 |
| BOND CJ  | HJ  | !   | 1 |
| BOND CM  | HM  | !   | 1 |
| BOND CM  | CN  | !   | 1 |
| BOND HN2 | CN  | !   | 1 |
| BOND CI  | HI  | !   | 1 |
| BOND HC2 | CC  | !   | 1 |
| BOND CC  | HC3 | !   | 1 |
| BOND CC  | HC1 | !   | 1 |
| BOND CN  | HN1 | !   | 1 |
| BOND CN  | HN3 | !   | 1 |
| IMPR CO  | CM  | N 4 | 0 |

END

# Parameters

BONDS

|        |        |         |       |   |
|--------|--------|---------|-------|---|
| CG201  | CG311  | 264.613 | 1.557 | ! |
| CG201  | NG2S2  | 508.573 | 1.359 | ! |
| CG201  | OG2D1  | 857.401 | 1.222 | ! |
| CG2R53 | CG311  | 279.484 | 1.513 | ! |
| CG2R53 | NG2R52 | 534.193 | 1.337 | ! |
| CG2R61 | CG2R61 | 472.068 | 1.401 | ! |
| CG2R61 | CG2RC0 | 105.178 | 1.395 | ! |
| CG2R61 | CG301  | 300.787 | 1.533 | ! |
| CG2R61 | HGR61  | 394.043 | 1.079 | ! |
| CG2RC0 | CG2RC0 | 84.364  | 1.405 | ! |
| CG2RC0 | NG2R52 | 436.845 | 1.401 | ! |
| CG301  | CG331  | 278.319 | 1.542 | ! |
| CG311  | CG311  | 273.155 | 1.565 | ! |
| CG311  | CG331  | 289.726 | 1.530 | ! |

|        |        |         |       |   |
|--------|--------|---------|-------|---|
| CG311  | NG321  | 352.173 | 1.458 | ! |
| CG311  | HGA1   | 348.246 | 1.098 | ! |
| CG331  | HGA3   | 357.024 | 1.092 | ! |
| NG2R52 | HGP2   | 481.330 | 1.014 | ! |
| NG2S2  | HGP1   | 483.046 | 1.015 | ! |
| NG321  | HGPAM2 | 473.782 | 1.013 | ! |

ANGLES

|        |        |        |         |         |       |         |   |
|--------|--------|--------|---------|---------|-------|---------|---|
| CG311  | CG201  | NG2S2  | 142.128 | 116.805 | 50.00 | 2.45000 | ! |
| CG311  | CG201  | OG2D1  | 134.480 | 119.541 |       |         | ! |
| NG2S2  | CG201  | OG2D1  | 134.507 | 123.653 | 50.00 | 2.37000 | ! |
| CG311  | CG2R53 | NG2R52 | 94.028  | 126.290 |       |         | ! |
| NG2R52 | CG2R53 | NG2R52 | 295.552 | 107.483 |       |         | ! |
| CG2R61 | CG2R61 | CG2R61 | 286.249 | 121.245 | 35.00 | 2.41620 | ! |
| CG2R61 | CG2R61 | CG2RC0 | 290.597 | 117.180 |       |         | ! |
| CG2R61 | CG2R61 | CG301  | 90.073  | 120.659 |       |         | ! |
| CG2R61 | CG2R61 | HGR61  | 77.791  | 119.839 | 22.00 | 2.15250 | ! |
| CG2RC0 | CG2R61 | HGR61  | 74.127  | 121.430 | 22.00 | 2.14600 | ! |
| CG2R61 | CG2RC0 | CG2RC0 | 293.148 | 121.660 |       |         | ! |
| CG2R61 | CG2RC0 | NG2R52 | 295.918 | 132.504 |       |         | ! |
| CG2RC0 | CG2RC0 | NG2R52 | 285.289 | 105.878 |       |         | ! |
| CG2R61 | CG301  | CG331  | 112.327 | 110.193 |       |         | ! |
| CG331  | CG301  | CG331  | 95.473  | 108.784 | 11.16 | 2.56100 | ! |
| CG201  | CG311  | CG311  | 146.882 | 112.969 |       |         | ! |
| CG201  | CG311  | CG331  | 144.046 | 108.696 |       |         | ! |
| CG201  | CG311  | HGA1   | 63.224  | 106.202 |       |         | ! |
| CG2R53 | CG311  | CG311  | 97.803  | 111.568 |       |         | ! |
| CG2R53 | CG311  | NG321  | 106.449 | 113.177 |       |         | ! |
| CG2R53 | CG311  | HGA1   | 74.148  | 105.692 |       |         | ! |
| CG311  | CG311  | CG331  | 115.816 | 113.352 | 8.00  | 2.56100 | ! |
| CG311  | CG311  | NG321  | 115.681 | 110.787 |       |         | ! |
| CG311  | CG311  | HGA1   | 69.379  | 107.294 | 22.53 | 2.17900 | ! |
| CG331  | CG311  | HGA1   | 64.153  | 108.308 | 22.53 | 2.17900 | ! |
| NG321  | CG311  | HGA1   | 79.617  | 107.404 | 50.00 | 2.14000 | ! |
| CG301  | CG331  | HGA3   | 60.196  | 111.189 | 22.53 | 2.17900 | ! |
| CG311  | CG331  | HGA3   | 55.449  | 110.698 | 22.53 | 2.17900 | ! |
| HGA3   | CG331  | HGA3   | 55.848  | 107.883 | 5.40  | 1.80200 | ! |
| CG2R53 | NG2R52 | CG2RC0 | 286.699 | 110.503 |       |         | ! |
| CG2R53 | NG2R52 | HGP2   | 69.988  | 123.727 | 15.00 | 2.09000 | ! |
| CG2RC0 | NG2R52 | HGP2   | 66.660  | 125.778 | 15.00 | 2.13000 | ! |
| CG201  | NG2S2  | HGP1   | 68.885  | 119.024 |       |         | ! |
| HGP1   | NG2S2  | HGP1   | 54.270  | 120.770 |       |         | ! |
| CG311  | NG321  | HGPAM2 | 60.020  | 113.793 |       |         | ! |
| HGPAM2 | NG321  | HGPAM2 | 50.154  | 109.943 |       |         | ! |

DIHEDRALS

|       |       |       |       |        |   |        |   |
|-------|-------|-------|-------|--------|---|--------|---|
| NG2S2 | CG201 | CG311 | CG311 | 0.0000 | 1 | 0.00   | ! |
| NG2S2 | CG201 | CG311 | CG331 | 0.0000 | 1 | 0.00   | ! |
| NG2S2 | CG201 | CG311 | CG331 | 0.0000 | 1 | 0.00   | ! |
| NG2S2 | CG201 | CG311 | CG331 | 0.0000 | 1 | 0.00   | ! |
| NG2S2 | CG201 | CG311 | HGA1  | 0.0000 | 1 | 0.00   | ! |
| NG2S2 | CG201 | CG311 | HGA1  | 0.0000 | 1 | 0.00   | ! |
| NG2S2 | CG201 | CG311 | HGA1  | 0.0000 | 1 | 0.00   | ! |
| OG2D1 | CG201 | CG311 | CG311 | 1.4000 | 1 | 0.00   | ! |
| OG2D1 | CG201 | CG311 | CG331 | 1.4000 | 1 | 0.00   | ! |
| OG2D1 | CG201 | CG311 | CG331 | 1.4000 | 1 | 0.00   | ! |
| OG2D1 | CG201 | CG311 | CG331 | 1.4000 | 1 | 0.00   | ! |
| OG2D1 | CG201 | CG311 | HGA1  | 0.0000 | 1 | 0.00   | ! |
| OG2D1 | CG201 | CG311 | HGA1  | 0.0000 | 1 | 0.00   | ! |
| OG2D1 | CG201 | CG311 | HGA1  | 0.0000 | 1 | 0.00   | ! |
| CG311 | CG201 | NG2S2 | HGP1  | 2.5000 | 2 | 180.00 | ! |
| CG311 | CG201 | NG2S2 | HGP1  | 2.5000 | 2 | 180.00 | ! |

|          |        |        |        |          |   |        |   |
|----------|--------|--------|--------|----------|---|--------|---|
| CG311    | CG201  | NG2S2  | HGP1   | 2.5000   | 2 | 180.00 | ! |
| OG2D1    | CG201  | NG2S2  | HGP1   | 1.4000   | 2 | 180.00 | ! |
| NG2R52   | CG2R53 | CG311  | CG311  | 0.1900   | 3 | 0.00   | ! |
| NG2R52   | CG2R53 | CG311  | CG311  | 0.1900   | 3 | 0.00   | ! |
| NG2R52   | CG2R53 | CG311  | NG321  | 0.1900   | 3 | 0.00   | ! |
| NG2R52   | CG2R53 | CG311  | HGA1   | 0.1900   | 3 | 0.00   | ! |
| CG311    | CG2R53 | NG2R52 | CG2RCO | 2.5000   | 2 | 180.00 | ! |
| CG311    | CG2R53 | NG2R52 | HGP2   | 3.0000   | 2 | 180.00 | ! |
| NG2R52   | CG2R53 | NG2R52 | CG2RCO | 12.0000  | 2 | 180.00 | ! |
| NG2R52   | CG2R53 | NG2R52 | CG2RCO | 12.0000  | 2 | 180.00 | ! |
| NG2R52   | CG2R53 | NG2R52 | HGP2   | 1.4000   | 2 | 180.00 | ! |
| CG2R61   | CG2R61 | CG2R61 | CG2R61 | 3.1000   | 2 | 180.00 | ! |
| CG2R61   | CG2R61 | CG2R61 | CG2RCO | 3.0000   | 2 | 180.00 | ! |
| CG2R61   | CG2R61 | CG2R61 | CG301  | 3.1000   | 2 | 180.00 | ! |
| CG2R61   | CG2R61 | CG2R61 | HGR61  | 4.2000   | 2 | 180.00 | ! |
| CG2RCO   | CG2R61 | CG2R61 | CG301  | 3.1000   | 2 | 180.00 | ! |
| CG2RCO   | CG2R61 | CG2R61 | HGR61  | 3.0000   | 2 | 180.00 | ! |
| CG2RCO   | CG2R61 | CG2R61 | HGR61  | 3.0000   | 2 | 180.00 | ! |
| CG301    | CG2R61 | CG2R61 | HGR61  | 2.4000   | 2 | 180.00 | ! |
| CG301    | CG2R61 | CG2R61 | HGR61  | 2.4000   | 2 | 180.00 | ! |
| HGR61    | CG2R61 | CG2R61 | HGR61  | 2.4000   | 2 | 180.00 | ! |
| CG2R61   | CG2R61 | CG2RCO | CG2RCO | 3.0000   | 2 | 180.00 | ! |
| CG2R61   | CG2R61 | CG2RCO | NG2R52 | 1.5000   | 2 | 180.00 | ! |
| HGR61    | CG2R61 | CG2RCO | CG2RCO | 3.0000   | 2 | 180.00 | ! |
| HGR61    | CG2R61 | CG2RCO | CG2RCO | 3.0000   | 2 | 180.00 | ! |
| HGR61    | CG2R61 | CG2RCO | NG2R52 | 0.8000   | 2 | 180.00 | ! |
| CG2R61   | CG2R61 | CG301  | CG331  | 0.2300   | 2 | 180.00 | ! |
| CG2R61   | CG2RCO | CG2RCO | CG2R61 | 3.0000   | 2 | 180.00 | ! |
| CG2R61   | CG2RCO | CG2RCO | NG2R52 | 1.5000   | 2 | 180.00 | ! |
| NG2R52   | CG2RCO | CG2RCO | NG2R52 | 10.0000  | 2 | 180.00 | ! |
| CG2R61   | CG2RCO | NG2R52 | CG2R53 | 12.0000  | 2 | 180.00 | ! |
| CG2R61   | CG2RCO | NG2R52 | HGP2   | 1.4000   | 2 | 180.00 | ! |
| CG2RCO   | CG2RCO | NG2R52 | CG2R53 | 12.0000  | 2 | 180.00 | ! |
| CG2RCO   | CG2RCO | NG2R52 | HGP2   | 1.4000   | 2 | 180.00 | ! |
| CG2R61   | CG301  | CG331  | HGA3   | 0.0400   | 3 | 0.00   | ! |
| CG331    | CG301  | CG331  | HGA3   | 0.1600   | 3 | 0.00   | ! |
| CG201    | CG311  | CG311  | CG2R53 | 0.2000   | 3 | 0.00   | ! |
| CG201    | CG311  | CG311  | CG2R53 | 0.2000   | 3 | 0.00   | ! |
| CG201    | CG311  | CG311  | CG2R53 | 0.2000   | 3 | 0.00   | ! |
| CG201    | CG311  | CG311  | NG321  | 0.2000   | 3 | 0.00   | ! |
| CG201    | CG311  | CG311  | HGA1   | 0.2000   | 3 | 0.00   | ! |
| CG2R53   | CG311  | CG311  | CG331  | 0.0400   | 3 | 0.00   | ! |
| CG2R53   | CG311  | CG311  | CG331  | 0.0400   | 3 | 0.00   | ! |
| CG2R53   | CG311  | CG311  | CG331  | 0.0400   | 3 | 0.00   | ! |
| CG2R53   | CG311  | CG311  | HGA1   | 0.2000   | 3 | 0.00   | ! |
| CG331    | CG311  | CG311  | NG321  | 0.2000   | 3 | 0.00   | ! |
| CG331    | CG311  | CG311  | HGA1   | 0.1950   | 3 | 0.00   | ! |
| NG321    | CG311  | CG311  | HGA1   | 0.1600   | 3 | 0.00   | ! |
| HGA1     | CG311  | CG311  | HGA1   | 0.1950   | 3 | 0.00   | ! |
| CG201    | CG311  | CG331  | HGA3   | 0.2000   | 3 | 0.00   | ! |
| CG311    | CG311  | CG331  | HGA3   | 0.2000   | 3 | 0.00   | ! |
| HGA1     | CG311  | CG331  | HGA3   | 0.1950   | 3 | 0.00   | ! |
| CG2R53   | CG311  | NG321  | HGPAM2 | 0.1600   | 3 | 0.00   | ! |
| CG311    | CG311  | NG321  | HGPAM2 | 0.1000   | 3 | 0.00   | ! |
| HGA1     | CG311  | NG321  | HGPAM2 | 0.0100   | 3 | 0.00   | ! |
| HGA1     | CG311  | NG321  | HGPAM2 | 0.0100   | 3 | 0.00   | ! |
| HGA1     | CG311  | NG321  | HGPAM2 | 0.0100   | 3 | 0.00   | ! |
| IMPROPER |        |        |        |          |   |        |   |
| CG201    | CG311  | NG2S2  | OG2D1  | 120.0000 | 0 | 0.00   | ! |

END  
RETURN

# Lidocaine

#

# Topology

36 1

RESI LDC 0.000

GROUP

|          |        |        |   |
|----------|--------|--------|---|
| ATOM CA  | CG2R61 | -0.115 | ! |
| ATOM HA  | HGR61  | 0.115  | ! |
| ATOM CB  | CG2R61 | 0.034  | ! |
| ATOM CC  | CG2R61 | -0.131 | ! |
| ATOM CD  | CG2R61 | 0.034  | ! |
| ATOM CE  | CG2R61 | -0.115 | ! |
| ATOM HE  | HGR61  | 0.115  | ! |
| ATOM CF  | CG2R61 | -0.115 | ! |
| ATOM HF  | HGR61  | 0.115  | ! |
| ATOM CG  | CG331  | -0.270 | ! |
| ATOM HG1 | HGA3   | 0.090  | ! |
| ATOM HG2 | HGA3   | 0.090  | ! |
| ATOM HG3 | HGA3   | 0.090  | ! |
| ATOM CH  | CG331  | -0.270 | ! |
| ATOM HH1 | HGA3   | 0.090  | ! |
| ATOM HH2 | HGA3   | 0.090  | ! |
| ATOM HH3 | HGA3   | 0.090  | ! |
| ATOM NA  | NG2S1  | -0.117 | ! |
| ATOM HN  | HGP1   | 0.177  | ! |
| ATOM CI  | CG201  | 0.673  | ! |
| ATOM O   | OG2D1  | -0.511 | ! |
| ATOM CJ  | CG321  | -0.206 | ! |
| ATOM HJ1 | HGA2   | 0.090  | ! |
| ATOM HJ2 | HGA2   | 0.090  | ! |
| ATOM NB  | NG301  | -0.369 | ! |
| ATOM CK  | CG321  | -0.062 | ! |
| ATOM HK1 | HGA2   | 0.090  | ! |
| ATOM HK2 | HGA2   | 0.090  | ! |
| ATOM CL  | CG331  | -0.270 | ! |
| ATOM HL1 | HGA3   | 0.090  | ! |
| ATOM HL2 | HGA3   | 0.090  | ! |
| ATOM HL3 | HGA3   | 0.090  | ! |
| ATOM CM  | CG321  | -0.062 | ! |
| ATOM HM1 | HGA2   | 0.090  | ! |
| ATOM HM2 | HGA2   | 0.090  | ! |
| ATOM CN  | CG331  | -0.270 | ! |
| ATOM HN1 | HGA3   | 0.090  | ! |
| ATOM HN2 | HGA3   | 0.090  | ! |
| ATOM HN3 | HGA3   | 0.090  | ! |

! Bond order

|          |     |   |   |
|----------|-----|---|---|
| BOND HL2 | CL  | ! | 1 |
| BOND HL1 | CL  | ! | 1 |
| BOND CL  | HL3 | ! | 1 |
| BOND CL  | CK  | ! | 1 |
| BOND HF  | CF  | ! | 1 |
| BOND HE  | CE  | ! | 1 |
| BOND HH2 | CH  | ! | 1 |
| BOND HK1 | CK  | ! | 1 |
| BOND HN1 | CN  | ! | 1 |
| BOND O   | CI  | ! | 2 |
| BOND CF  | CE  | ! | 1 |
| BOND CF  | CA  | ! | 2 |

|          |     |    |   |
|----------|-----|----|---|
| BOND CE  | CD  | !  | 2 |
| BOND CK  | NB  | !  | 1 |
| BOND CK  | HK2 | !  | 1 |
| BOND HN3 | CN  | !  | 1 |
| BOND HA  | CA  | !  | 1 |
| BOND CA  | CB  | !  | 1 |
| BOND HG2 | CG  | !  | 1 |
| BOND CD  | CH  | !  | 1 |
| BOND CD  | CC  | !  | 1 |
| BOND CH  | HH3 | !  | 1 |
| BOND CH  | HH1 | !  | 1 |
| BOND CN  | HN2 | !  | 1 |
| BOND CN  | CM  | !  | 1 |
| BOND NB  | CM  | !  | 1 |
| BOND NB  | CJ  | !  | 1 |
| BOND CB  | CC  | !  | 2 |
| BOND CB  | CG  | !  | 1 |
| BOND CC  | NA  | !  | 1 |
| BOND CI  | NA  | !  | 1 |
| BOND CI  | CJ  | !  | 1 |
| BOND CG  | HG1 | !  | 1 |
| BOND CG  | HG3 | !  | 1 |
| BOND NA  | HN  | !  | 1 |
| BOND CM  | HM1 | !  | 1 |
| BOND CM  | HM2 | !  | 1 |
| BOND CJ  | HJ2 | !  | 1 |
| BOND CJ  | HJ1 | !  | 1 |
| IMPR CI  | CJ  | NA | 0 |

END

# Parameters

BONDS

|        |        |         |       |   |
|--------|--------|---------|-------|---|
| CG201  | CG321  | 283.302 | 1.529 | ! |
| CG201  | NG2S1  | 447.022 | 1.378 | ! |
| CG201  | OG2D1  | 811.230 | 1.227 | ! |
| CG2R61 | CG2R61 | 362.949 | 1.370 | ! |
| CG2R61 | CG331  | 296.511 | 1.504 | ! |
| CG2R61 | NG2S1  | 414.059 | 1.408 | ! |
| CG2R61 | HGR61  | 351.466 | 1.088 | ! |
| CG321  | CG331  | 299.955 | 1.524 | ! |
| CG321  | NG301  | 344.534 | 1.455 | ! |
| CG321  | HGA2   | 335.089 | 1.099 | ! |
| CG331  | HGA3   | 353.752 | 1.096 | ! |
| NG2S1  | HGP1   | 476.127 | 1.011 | ! |

ANGLES

|        |        |        |         |         |       |          |
|--------|--------|--------|---------|---------|-------|----------|
| CG321  | CG201  | NG2S1  | 105.549 | 113.166 |       | !        |
| CG321  | CG201  | OG2D1  | 112.568 | 124.575 |       | !        |
| NG2S1  | CG201  | OG2D1  | 115.192 | 122.381 |       | !        |
| CG2R61 | CG2R61 | CG2R61 | 56.245  | 120.124 | 35.00 | 2.416 00 |
| CG2R61 | CG2R61 | CG331  | 78.777  | 120.347 |       | !        |
| CG2R61 | CG2R61 | NG2S1  | 104.758 | 120.284 | 35.00 | 2.416 00 |
| CG2R61 | CG2R61 | HGR61  | 38.995  | 120.551 | 22.00 | 2.152 50 |
| CG201  | CG321  | NG301  | 111.427 | 112.321 |       | !        |
| CG201  | CG321  | HGA2   | 60.577  | 107.631 | 30.00 | 2.163 00 |
| CG331  | CG321  | NG301  | 103.252 | 114.594 |       | !        |
| CG331  | CG321  | HGA2   | 62.507  | 109.296 | 22.53 | 2.179 00 |
| NG301  | CG321  | HGA2   | 71.957  | 109.154 | 50.00 | 2.130 00 |
| HGA2   | CG321  | HGA2   | 60.371  | 106.683 | 5.40  | 1.802 00 |
| CG2R61 | CG331  | HGA3   | 34.012  | 109.403 |       | !        |
| CG321  | CG331  | HGA3   | 65.438  | 110.764 | 22.53 | 2.179 00 |
| HGA3   | CG331  | HGA3   | 45.274  | 108.130 | 5.40  | 1.802 00 |

|        |       |        |         |         |  |   |
|--------|-------|--------|---------|---------|--|---|
| CG201  | NG2S1 | CG2R61 | 50.000  | 120.000 |  | ! |
| CG201  | NG2S1 | HGP1   | 59.055  | 118.293 |  | ! |
| CG2R61 | NG2S1 | HGP1   | 34.000  | 117.000 |  | ! |
| CG321  | NG301 | CG321  | 113.117 | 112.307 |  | ! |

DIHEDRALS

|        |        |        |        |        |   |        |   |
|--------|--------|--------|--------|--------|---|--------|---|
| NG2S1  | CG201  | CG321  | NG301  | 0.2610 | 1 | 180.00 | ! |
| NG2S1  | CG201  | CG321  | NG301  | 0.3360 | 2 | 180.00 | ! |
| NG2S1  | CG201  | CG321  | NG301  | 0.1750 | 4 | 0.00   | ! |
| NG2S1  | CG201  | CG321  | HGA2   | 1.3850 | 2 | 0.00   | ! |
| NG2S1  | CG201  | CG321  | HGA2   | 0.1090 | 3 | 0.00   | ! |
| NG2S1  | CG201  | CG321  | HGA2   | 0.1720 | 4 | 180.00 | ! |
| OG2D1  | CG201  | CG321  | NG301  | 0.3680 | 1 | 180.00 | ! |
| OG2D1  | CG201  | CG321  | NG301  | 0.1740 | 2 | 180.00 | ! |
| OG2D1  | CG201  | CG321  | NG301  | 0.1150 | 3 | 0.00   | ! |
| OG2D1  | CG201  | CG321  | HGA2   | 0.1540 | 1 | 180.00 | ! |
| OG2D1  | CG201  | CG321  | HGA2   | 0.4100 | 2 | 0.00   | ! |
| OG2D1  | CG201  | CG321  | HGA2   | 0.2320 | 3 | 0.00   | ! |
| CG321  | CG201  | NG2S1  | CG2R61 | 1.4210 | 1 | 180.00 | ! |
| CG321  | CG201  | NG2S1  | CG2R61 | 2.7860 | 2 | 180.00 | ! |
| CG321  | CG201  | NG2S1  | CG2R61 | 0.8350 | 3 | 0.00   | ! |
| CG321  | CG201  | NG2S1  | CG2R61 | 0.2810 | 6 | 0.00   | ! |
| CG321  | CG201  | NG2S1  | HGP1   | 0.7270 | 1 | 180.00 | ! |
| CG321  | CG201  | NG2S1  | HGP1   | 2.7860 | 2 | 180.00 | ! |
| CG321  | CG201  | NG2S1  | HGP1   | 0.9760 | 3 | 0.00   | ! |
| OG2D1  | CG201  | NG2S1  | CG2R61 | 1.3870 | 1 | 180.00 | ! |
| OG2D1  | CG201  | NG2S1  | CG2R61 | 3.0000 | 2 | 180.00 | ! |
| OG2D1  | CG201  | NG2S1  | CG2R61 | 0.6580 | 3 | 180.00 | ! |
| OG2D1  | CG201  | NG2S1  | CG2R61 | 0.4180 | 4 | 180.00 | ! |
| OG2D1  | CG201  | NG2S1  | CG2R61 | 0.5920 | 6 | 0.00   | ! |
| OG2D1  | CG201  | NG2S1  | HGP1   | 3.0000 | 2 | 180.00 | ! |
| OG2D1  | CG201  | NG2S1  | HGP1   | 0.9820 | 3 | 180.00 | ! |
| OG2D1  | CG201  | NG2S1  | HGP1   | 1.2130 | 4 | 180.00 | ! |
| OG2D1  | CG201  | NG2S1  | HGP1   | 0.5120 | 6 | 0.00   | ! |
| CG2R61 | CG2R61 | CG2R61 | CG2R61 | 2.9110 | 2 | 180.00 | ! |
| CG2R61 | CG2R61 | CG2R61 | CG331  | 1.7120 | 3 | 0.00   | ! |
| CG2R61 | CG2R61 | CG2R61 | NG2S1  | 3.0000 | 3 | 0.00   | ! |
| CG2R61 | CG2R61 | CG2R61 | HGR61  | 2.6800 | 3 | 0.00   | ! |
| CG331  | CG2R61 | CG2R61 | NG2S1  | 0.4040 | 3 | 0.00   | ! |
| CG331  | CG2R61 | CG2R61 | HGR61  | 2.9570 | 3 | 180.00 | ! |
| HGR61  | CG2R61 | CG2R61 | HGR61  | 0.1890 | 2 | 180.00 | ! |
| CG2R61 | CG2R61 | CG331  | HGA3   | 2.9990 | 2 | 0.00   | ! |
| CG2R61 | CG2R61 | CG331  | HGA3   | 0.5740 | 3 | 180.00 | ! |
| CG2R61 | CG2R61 | NG2S1  | CG201  | 0.6460 | 3 | 180.00 | ! |
| CG2R61 | CG2R61 | NG2S1  | CG201  | 0.4270 | 4 | 0.00   | ! |
| CG2R61 | CG2R61 | NG2S1  | CG201  | 0.1630 | 6 | 0.00   | ! |
| CG2R61 | CG2R61 | NG2S1  | HGP1   | 1.5830 | 3 | 180.00 | ! |
| CG2R61 | CG2R61 | NG2S1  | HGP1   | 0.5190 | 4 | 0.00   | ! |
| NG301  | CG321  | CG331  | HGA3   | 0.4530 | 3 | 0.00   | ! |
| HGA2   | CG321  | CG331  | HGA3   | 0.0220 | 3 | 180.00 | ! |
| CG201  | CG321  | NG301  | CG321  | 0.5510 | 2 | 180.00 | ! |
| CG201  | CG321  | NG301  | CG321  | 0.7360 | 3 | 0.00   | ! |
| CG331  | CG321  | NG301  | CG321  | 0.1190 | 3 | 0.00   | ! |
| HGA2   | CG321  | NG301  | CG321  | 0.8070 | 1 | 180.00 | ! |
| HGA2   | CG321  | NG301  | CG321  | 0.5610 | 2 | 180.00 | ! |
| HGA2   | CG321  | NG301  | CG321  | 0.3270 | 3 | 0.00   | ! |

IMPROPERS

|       |       |       |       |          |   |      |   |
|-------|-------|-------|-------|----------|---|------|---|
| CG201 | CG321 | NG2S1 | OG2D1 | 120.0000 | 0 | 0.00 | ! |
|-------|-------|-------|-------|----------|---|------|---|

END

RETURN

# Charged Lidocaine

#

# Topology

36 1

|          |        |        |              |
|----------|--------|--------|--------------|
| RESI     | LDN    | 0.000  |              |
| GROUP    |        |        |              |
| ATOM CA  | CG2R61 | -0.115 | !            |
| ATOM HA  | HGR61  | 0.115  | !            |
| ATOM CB  | CG2R61 | 0.034  | !            |
| ATOM CC  | CG2R61 | -0.131 | !            |
| ATOM CD  | CG2R61 | 0.034  | !            |
| ATOM CE  | CG2R61 | -0.115 | !            |
| ATOM HE  | HGR61  | 0.115  | !            |
| ATOM CF  | CG2R61 | -0.115 | !            |
| ATOM HF  | HGR61  | 0.115  | !            |
| ATOM CG  | CG331  | -0.270 | !            |
| ATOM HG1 | HGA3   | 0.090  | !            |
| ATOM HG2 | HGA3   | 0.090  | !            |
| ATOM HG3 | HGA3   | 0.090  | !            |
| ATOM CH  | CG331  | -0.270 | !            |
| ATOM HH1 | HGA3   | 0.090  | !            |
| ATOM HH2 | HGA3   | 0.090  | !            |
| ATOM HH3 | HGA3   | 0.090  | !            |
| ATOM NA  | NG2S1  | -0.117 | !            |
| ATOM HNA | HGP1   | 0.209  | !            |
| ATOM CI  | CG201  | 0.469  | !            |
| ATOM O   | OG2D1  | -0.360 | !            |
| ATOM CJ  | CG324  | -0.023 | !            |
| ATOM HJ1 | HGA2   | 0.090  | !            |
| ATOM HJ2 | HGA2   | 0.090  | !            |
| ATOM NB  | NG3P1  | 0.022  | !            |
| ATOM HNB | HGP2   | 0.031  | !            |
| ATOM CK  | CG324  | 0.146  | !            |
| ATOM HK1 | HGA2   | 0.090  | !            |
| ATOM HK2 | HGA2   | 0.090  | !            |
| ATOM CL  | CG331  | -0.270 | !            |
| ATOM HL1 | HGA3   | 0.090  | !            |
| ATOM HL2 | HGA3   | 0.090  | !            |
| ATOM HL3 | HGA3   | 0.090  | !            |
| ATOM CM  | CG324  | 0.146  | !            |
| ATOM HM1 | HGA2   | 0.090  | !            |
| ATOM HM2 | HGA2   | 0.090  | !            |
| ATOM CN  | CG331  | -0.270 | !            |
| ATOM HN1 | HGA3   | 0.090  | !            |
| ATOM HN2 | HGA3   | 0.090  | !            |
| ATOM HN3 | HGA3   | 0.090  | !            |
|          |        |        | ! Bond order |
| BOND HL2 | CL     |        | ! 1          |
| BOND HL1 | CL     |        | ! 1          |
| BOND HL3 | CL     |        | ! 1          |
| BOND CL  | CK     |        | ! 1          |
| BOND HF  | CF     |        | ! 1          |
| BOND HE  | CE     |        | ! 1          |
| BOND HH2 | CH     |        | ! 1          |
| BOND O   | CI     |        | ! 2          |
| BOND CE  | CF     |        | ! 1          |
| BOND CE  | CD     |        | ! 2          |
| BOND CF  | CA     |        | ! 2          |
| BOND HNB | NB     |        | ! 1          |
| BOND HN3 | CN     |        | ! 1          |
| BOND HH3 | CH     |        | ! 1          |

|          |     |    |   |
|----------|-----|----|---|
| BOND CA  | HA  | !  | 1 |
| BOND CA  | CB  | !  | 1 |
| BOND CD  | CH  | !  | 1 |
| BOND CD  | CC  | !  | 1 |
| BOND CH  | HH1 | !  | 1 |
| BOND CK  | HK1 | !  | 1 |
| BOND CK  | NB  | !  | 1 |
| BOND CK  | HK2 | !  | 1 |
| BOND HM2 | CM  | !  | 1 |
| BOND NB  | CM  | !  | 1 |
| BOND NB  | CJ  | !  | 1 |
| BOND CI  | NA  | !  | 1 |
| BOND CI  | CJ  | !  | 1 |
| BOND CC  | CB  | !  | 2 |
| BOND CC  | NA  | !  | 1 |
| BOND CB  | CG  | !  | 1 |
| BOND CN  | CM  | !  | 1 |
| BOND CN  | HN2 | !  | 1 |
| BOND CN  | HN1 | !  | 1 |
| BOND HG2 | CG  | !  | 1 |
| BOND CM  | HM1 | !  | 1 |
| BOND HG1 | CG  | !  | 1 |
| BOND NA  | HNA | !  | 1 |
| BOND CG  | HG3 | !  | 1 |
| BOND CJ  | HJ2 | !  | 1 |
| BOND CJ  | HJ1 | !  | 1 |
| IMPR CI  | CJ  | NA | 0 |

END

# Parameters

BONDS

|        |        |         |       |   |
|--------|--------|---------|-------|---|
| CG201  | CG324  | 323.888 | 1.535 | ! |
| CG201  | NG2S1  | 535.640 | 1.341 | ! |
| CG201  | OG2D1  | 729.461 | 1.241 | ! |
| CG2R61 | CG2R61 | 332.977 | 1.370 | ! |
| CG2R61 | CG331  | 289.678 | 1.503 | ! |
| CG2R61 | NG2S1  | 338.950 | 1.440 | ! |
| CG2R61 | HGR61  | 360.459 | 1.086 | ! |
| CG324  | CG331  | 323.154 | 1.512 | ! |
| CG324  | NG3P1  | 325.738 | 1.487 | ! |
| CG324  | HGA2   | 352.740 | 1.092 | ! |
| CG331  | HGA3   | 352.341 | 1.093 | ! |
| NG2S1  | HGP1   | 438.739 | 1.017 | ! |
| NG3P1  | HGP2   | 343.255 | 1.049 | ! |

ANGLES

|        |        |        |         |         |       |            |
|--------|--------|--------|---------|---------|-------|------------|
| CG324  | CG201  | NG2S1  | 96.822  | 116.009 |       | !          |
| CG324  | CG201  | OG2D1  | 149.268 | 117.737 |       | !          |
| NG2S1  | CG201  | OG2D1  | 126.403 | 126.028 |       | !          |
| CG2R61 | CG2R61 | CG2R61 | 84.906  | 120.031 | 35.00 | 2.416 20 ! |
| CG2R61 | CG2R61 | CG331  | 80.855  | 121.549 |       | !          |
| CG2R61 | CG2R61 | NG2S1  | 154.638 | 118.312 | 35.00 | 2.416 20 ! |
| CG2R61 | CG2R61 | HGR61  | 57.543  | 119.563 | 22.00 | 2.152 50 ! |
| CG201  | CG324  | NG3P1  | 150.551 | 105.020 |       | !          |
| CG201  | CG324  | HGA2   | 67.219  | 112.119 | 30.00 | 2.163 00 ! |
| CG331  | CG324  | NG3P1  | 107.723 | 111.740 |       | !          |
| CG331  | CG324  | HGA2   | 71.584  | 111.479 | 22.53 | 2.179 00 ! |
| NG3P1  | CG324  | HGA2   | 85.454  | 106.888 | 35.00 | 2.101 00 ! |
| HGA2   | CG324  | HGA2   | 80.115  | 108.969 | 5.40  | 1.802 00 ! |
| CG2R61 | CG331  | HGA3   | 66.094  | 110.852 |       | !          |
| CG324  | CG331  | HGA3   | 71.642  | 110.758 | 22.53 | 2.179 00 ! |
| HGA3   | CG331  | HGA3   | 65.907  | 108.379 | 5.40  | 1.802 00 ! |



|        |       |        |         |         |       |         |   |
|--------|-------|--------|---------|---------|-------|---------|---|
| CG201  | NG2S1 | CG2R61 | 92.346  | 123.641 |       |         | ! |
| CG201  | NG2S1 | HGP1   | 111.348 | 118.502 |       |         | ! |
| CG2R61 | NG2S1 | HGP1   | 101.233 | 117.959 |       |         | ! |
| CG324  | NG3P1 | CG324  | 108.858 | 112.617 |       |         | ! |
| CG324  | NG3P1 | HGP2   | 78.873  | 106.051 | 27.00 | 2.07400 | ! |

DIHEDRALS

|        |        |        |        |        |   |        |   |
|--------|--------|--------|--------|--------|---|--------|---|
| NG2S1  | CG201  | CG324  | NG3P1  | 2.9920 | 1 | 0.00   | ! |
| NG2S1  | CG201  | CG324  | NG3P1  | 2.2150 | 2 | 180.00 | ! |
| NG2S1  | CG201  | CG324  | NG3P1  | 0.3430 | 4 | 0.00   | ! |
| NG2S1  | CG201  | CG324  | HGA2   | 0.8640 | 2 | 180.00 | ! |
| OG2D1  | CG201  | CG324  | NG3P1  | 0.5650 | 3 | 180.00 | ! |
| OG2D1  | CG201  | CG324  | HGA2   | 0.7990 | 2 | 0.00   | ! |
| CG324  | CG201  | NG2S1  | CG2R61 | 1.0950 | 1 | 180.00 | ! |
| CG324  | CG201  | NG2S1  | CG2R61 | 0.1810 | 2 | 180.00 | ! |
| CG324  | CG201  | NG2S1  | CG2R61 | 0.9480 | 3 | 0.00   | ! |
| CG324  | CG201  | NG2S1  | CG2R61 | 1.3220 | 4 | 180.00 | ! |
| CG324  | CG201  | NG2S1  | HGP1   | 3.0000 | 1 | 180.00 | ! |
| CG324  | CG201  | NG2S1  | HGP1   | 3.0000 | 2 | 180.00 | ! |
| CG324  | CG201  | NG2S1  | HGP1   | 0.9030 | 3 | 0.00   | ! |
| OG2D1  | CG201  | NG2S1  | CG2R61 | 2.9990 | 2 | 180.00 | ! |
| OG2D1  | CG201  | NG2S1  | CG2R61 | 1.5540 | 4 | 180.00 | ! |
| OG2D1  | CG201  | NG2S1  | CG2R61 | 0.6260 | 6 | 0.00   | ! |
| OG2D1  | CG201  | NG2S1  | HGP1   | 3.0000 | 2 | 180.00 | ! |
| CG2R61 | CG2R61 | CG2R61 | CG2R61 | 1.3610 | 2 | 180.00 | ! |
| CG2R61 | CG2R61 | CG2R61 | CG331  | 2.7620 | 3 | 0.00   | ! |
| CG2R61 | CG2R61 | CG2R61 | NG2S1  | 3.0000 | 3 | 0.00   | ! |
| CG2R61 | CG2R61 | CG2R61 | HGR61  | 1.2930 | 3 | 0.00   | ! |
| CG331  | CG2R61 | CG2R61 | NG2S1  | 1.0250 | 3 | 180.00 | ! |
| CG331  | CG2R61 | CG2R61 | HGR61  | 2.5640 | 3 | 180.00 | ! |
| HGR61  | CG2R61 | CG2R61 | HGR61  | 3.0000 | 3 | 180.00 | ! |
| CG2R61 | CG2R61 | CG331  | HGA3   | 0.6190 | 3 | 180.00 | ! |
| CG2R61 | CG2R61 | CG331  | HGA3   | 0.0450 | 6 | 0.00   | ! |
| CG2R61 | CG2R61 | NG2S1  | CG201  | 0.1160 | 2 | 0.00   | ! |
| CG2R61 | CG2R61 | NG2S1  | HGP1   | 0.7030 | 2 | 180.00 | ! |
| NG3P1  | CG324  | CG331  | HGA3   | 0.4210 | 3 | 0.00   | ! |
| HGA2   | CG324  | CG331  | HGA3   | 0.0020 | 3 | 0.00   | ! |
| CG201  | CG324  | NG3P1  | CG324  | 1.4760 | 1 | 0.00   | ! |
| CG201  | CG324  | NG3P1  | HGP2   | 0.2400 | 2 | 180.00 | ! |
| CG331  | CG324  | NG3P1  | CG324  | 0.7060 | 1 | 0.00   | ! |
| CG331  | CG324  | NG3P1  | CG324  | 0.8200 | 2 | 0.00   | ! |
| CG331  | CG324  | NG3P1  | CG324  | 0.5760 | 3 | 0.00   | ! |
| CG331  | CG324  | NG3P1  | HGP2   | 0.1100 | 3 | 0.00   | ! |
| HGA2   | CG324  | NG3P1  | CG324  | 0.0220 | 3 | 0.00   | ! |
| HGA2   | CG324  | NG3P1  | HGP2   | 1.9910 | 2 | 180.00 | ! |

IMPROPERS

|       |       |       |       |          |   |      |   |
|-------|-------|-------|-------|----------|---|------|---|
| CG201 | CG324 | NG2S1 | OG2D1 | 120.0000 | 0 | 0.00 | ! |
|-------|-------|-------|-------|----------|---|------|---|

END

RETURN

# Carbamazepine

#

# Topology

36 1

|      |     |       |  |
|------|-----|-------|--|
| RESI | CBZ | 0.000 |  |
|------|-----|-------|--|

GROUP

|         |        |        |   |
|---------|--------|--------|---|
| ATOM C1 | CG2R61 | -0.108 | ! |
|---------|--------|--------|---|

|         |       |       |   |
|---------|-------|-------|---|
| ATOM H1 | HGR61 | 0.115 | ! |
|---------|-------|-------|---|

|         |        |        |   |
|---------|--------|--------|---|
| ATOM C2 | CG2R61 | -0.115 | ! |
|---------|--------|--------|---|

|           |        |        |              |
|-----------|--------|--------|--------------|
| ATOM H2   | HGR61  | 0.115  | !            |
| ATOM C3   | CG2R61 | -0.115 | !            |
| ATOM H3   | HGR61  | 0.115  | !            |
| ATOM C4   | CG2R61 | -0.088 | !            |
| ATOM H4   | HGR61  | 0.115  | !            |
| ATOM C5   | CG2R61 | 0.072  | !            |
| ATOM C6   | CG2R71 | -0.258 | !            |
| ATOM H6   | HGR71  | 0.184  | !            |
| ATOM C7   | CG2R71 | -0.258 | !            |
| ATOM H7   | HGR71  | 0.184  | !            |
| ATOM C8   | CG2R61 | 0.072  | !            |
| ATOM C9   | CG2R61 | -0.088 | !            |
| ATOM H8   | HGR61  | 0.115  | !            |
| ATOM C10  | CG2R61 | -0.115 | !            |
| ATOM H10  | HGR61  | 0.115  | !            |
| ATOM C11  | CG2R61 | -0.115 | !            |
| ATOM H11  | HGR61  | 0.115  | !            |
| ATOM C12  | CG2R61 | -0.108 | !            |
| ATOM H12  | HGR61  | 0.115  | !            |
| ATOM C13  | CG2R61 | 0.039  | !            |
| ATOM N14  | NG2S0  | -0.097 | !            |
| ATOM C15  | CG2R61 | 0.039  | !            |
| ATOM C16  | CG2O6  | 0.828  | !            |
| ATOM O17  | OG2D1  | -0.614 | !            |
| ATOM N18  | NG2S2  | -0.941 | !            |
| ATOM H181 | HGP1   | 0.341  | !            |
| ATOM H182 | HGP1   | 0.341  | !            |
|           |        |        | ! Bond order |
| BOND H2   | C2     |        | ! 1          |
| BOND H11  | C11    |        | ! 1          |
| BOND H1   | C1     |        | ! 1          |
| BOND H12  | C12    |        | ! 1          |
| BOND C2   | C1     |        | ! 2          |
| BOND C2   | C3     |        | ! 1          |
| BOND C11  | C12    |        | ! 1          |
| BOND C11  | C10    |        | ! 2          |
| BOND C1   | C15    |        | ! 1          |
| BOND C12  | C13    |        | ! 2          |
| BOND H3   | C3     |        | ! 1          |
| BOND H10  | C10    |        | ! 1          |
| BOND C3   | C4     |        | ! 2          |
| BOND C10  | C9     |        | ! 1          |
| BOND C15  | N14    |        | ! 1          |
| BOND C15  | C5     |        | ! 2          |
| BOND C13  | N14    |        | ! 1          |
| BOND C13  | C8     |        | ! 1          |
| BOND N14  | C16    |        | ! 1          |
| BOND C4   | C5     |        | ! 1          |
| BOND C4   | H4     |        | ! 1          |
| BOND C9   | C8     |        | ! 2          |
| BOND C9   | H8     |        | ! 1          |
| BOND C5   | C6     |        | ! 1          |
| BOND C8   | C7     |        | ! 1          |
| BOND C16  | O17    |        | ! 2          |
| BOND C16  | N18    |        | ! 1          |
| BOND N18  | H181   |        | ! 1          |
| BOND N18  | H182   |        | ! 1          |
| BOND C6   | C7     |        | ! 2          |
| BOND C6   | H6     |        | ! 1          |
| BOND C7   | H7     |        | ! 1          |
| IMPR C16  | N14    | NL8    | O17          |

|         |    |     |    |
|---------|----|-----|----|
| IMPR N  | H5 | H 6 | C6 |
| IMPR C7 | C3 | 0 1 | 02 |

END

# Parameters

BONDS

|        |        |         |       |   |
|--------|--------|---------|-------|---|
| CG206  | NG2S0  | 391.169 | 1.355 | ! |
| CG206  | NG2S2  | 441.546 | 1.358 | ! |
| CG206  | OG2D1  | 767.402 | 1.241 | ! |
| CG2R61 | CG2R61 | 357.930 | 1.337 | ! |
| CG2R61 | CG2R71 | 241.523 | 1.446 | ! |
| CG2R61 | NG2S0  | 279.960 | 1.400 | ! |
| CG2R61 | HGR61  | 361.428 | 1.078 | ! |
| CG2R71 | CG2R71 | 508.209 | 1.355 | ! |
| CG2R71 | HGR71  | 357.536 | 1.076 | ! |
| NG2S2  | HGP1   | 430.906 | 1.012 | ! |

ANGLES

|        |        |        |         |         |       |         |
|--------|--------|--------|---------|---------|-------|---------|
| NG2S0  | CG206  | NG2S2  | 168.682 | 114.091 |       | !       |
| NG2S0  | CG206  | OG2D1  | 135.886 | 122.807 |       | !       |
| NG2S2  | CG206  | OG2D1  | 132.320 | 123.396 | 50.00 | 2.37000 |
| CG2R61 | CG2R61 | CG2R61 | 35.667  | 120.875 | 35.00 | 2.41620 |
| CG2R61 | CG2R61 | CG2R71 | 152.183 | 120.373 |       | !       |
| CG2R61 | CG2R61 | NG2S0  | 52.193  | 119.348 | 35.00 | 2.41620 |
| CG2R61 | CG2R61 | HGR61  | 53.543  | 121.203 | 22.00 | 2.15250 |
| CG2R61 | CG2R71 | CG2R71 | 128.134 | 126.881 |       | !       |
| CG2R61 | CG2R71 | HGR71  | 85.272  | 114.546 |       | !       |
| CG2R71 | CG2R71 | HGR71  | 76.806  | 118.684 |       | !       |
| CG206  | NG2S0  | CG2R61 | 85.103  | 120.844 |       | !       |
| CG2R61 | NG2S0  | CG2R61 | 151.009 | 116.746 |       | !       |
| CG206  | NG2S2  | HGP1   | 101.309 | 114.361 |       | !       |
| HGP1   | NG2S2  | HGP1   | 51.136  | 114.325 |       | !       |

DIHEDRALS

|        |        |        |        |        |   |        |   |
|--------|--------|--------|--------|--------|---|--------|---|
| NG2S2  | CG206  | NG2S0  | CG2R61 | 2.9980 | 1 | 0.00   | ! |
| NG2S2  | CG206  | NG2S0  | CG2R61 | 3.0000 | 2 | 180.00 | ! |
| NG2S2  | CG206  | NG2S0  | CG2R61 | 0.6410 | 3 | 0.00   | ! |
| NG2S2  | CG206  | NG2S0  | CG2R61 | 0.7230 | 4 | 0.00   | ! |
| OG2D1  | CG206  | NG2S0  | CG2R61 | 0.0170 | 3 | 180.00 | ! |
| NG2S0  | CG206  | NG2S2  | HGP1   | 1.1300 | 2 | 180.00 | ! |
| OG2D1  | CG206  | NG2S2  | HGP1   | 2.4440 | 1 | 0.00   | ! |
| OG2D1  | CG206  | NG2S2  | HGP1   | 2.9860 | 2 | 180.00 | ! |
| OG2D1  | CG206  | NG2S2  | HGP1   | 0.4270 | 3 | 180.00 | ! |
| CG2R61 | CG2R61 | CG2R61 | CG2R61 | 2.7260 | 2 | 180.00 | ! |
| CG2R61 | CG2R61 | CG2R61 | CG2R71 | 0.7890 | 3 | 0.00   | ! |
| CG2R61 | CG2R61 | CG2R61 | NG2S0  | 2.4190 | 3 | 0.00   | ! |
| CG2R61 | CG2R61 | CG2R61 | HGR61  | 0.8260 | 3 | 0.00   | ! |
| CG2R71 | CG2R61 | CG2R61 | NG2S0  | 2.9970 | 2 | 180.00 | ! |
| CG2R71 | CG2R61 | CG2R61 | HGR61  | 2.9100 | 3 | 180.00 | ! |
| NG2S0  | CG2R61 | CG2R61 | HGR61  | 2.6690 | 3 | 180.00 | ! |
| HGR61  | CG2R61 | CG2R61 | HGR61  | 2.9990 | 2 | 180.00 | ! |
| HGR61  | CG2R61 | CG2R61 | HGR61  | 1.6090 | 3 | 180.00 | ! |
| CG2R61 | CG2R61 | CG2R71 | CG2R71 | 1.5590 | 2 | 180.00 | ! |
| CG2R61 | CG2R61 | CG2R71 | HGR71  | 3.0000 | 2 | 180.00 | ! |
| CG2R61 | CG2R61 | CG2R71 | HGR71  | 2.9990 | 3 | 180.00 | ! |
| CG2R61 | CG2R61 | CG2R71 | HGR71  | 1.5680 | 4 | 0.00   | ! |
| CG2R61 | CG2R61 | NG2S0  | CG206  | 1.8140 | 3 | 180.00 | ! |
| CG2R61 | CG2R61 | NG2S0  | CG2R61 | 1.3370 | 3 | 0.00   | ! |
| CG2R61 | CG2R71 | CG2R71 | CG2R61 | 2.1970 | 2 | 0.00   | ! |
| CG2R61 | CG2R71 | CG2R71 | HGR71  | 1.0580 | 3 | 0.00   | ! |
| HGR71  | CG2R71 | CG2R71 | HGR71  | 3.0000 | 2 | 180.00 | ! |

IMPROPERS

CG206 NG2S0 NG2S2 OG2D1 80.0000 0 0.00 !

END  
RETURN

# Lamotrigine

#

# Topology

36 1

RESI LMT 0.000

GROUP

|          |        |        |   |
|----------|--------|--------|---|
| ATOM C1  | CG2R64 | 0.761  | ! |
| ATOM N1  | NG2S3  | -0.508 | ! |
| ATOM H1  | HGP4   | 0.260  | ! |
| ATOM H2  | HGP4   | 0.260  | ! |
| ATOM N2  | NG2R62 | -0.698 | ! |
| ATOM C2  | CG2R64 | 0.297  | ! |
| ATOM N3  | NG2S3  | -0.335 | ! |
| ATOM H3  | HGP4   | 0.284  | ! |
| ATOM H4  | HGP4   | 0.284  | ! |
| ATOM N4  | NG2R62 | -0.443 | ! |
| ATOM N5  | NG2R62 | -0.417 | ! |
| ATOM C3  | CG2R67 | 0.077  | ! |
| ATOM C4  | CG2R67 | 0.401  | ! |
| ATOM C5  | CG2R61 | -0.115 | ! |
| ATOM H5  | HGR62  | 0.115  | ! |
| ATOM C6  | CG2R61 | -0.115 | ! |
| ATOM H6  | HGR61  | 0.115  | ! |
| ATOM C7  | CG2R61 | -0.115 | ! |
| ATOM H7  | HGR61  | 0.115  | ! |
| ATOM C8  | CG2R61 | -0.412 | ! |
| ATOM CL  | CLGR1  | -0.105 | ! |
| ATOM C9  | CG2R61 | 0.309  | ! |
| ATOM CL2 | CLGR1  | -0.015 | ! |

! Bond order

|          |    |     |    |
|----------|----|-----|----|
| BOND H1  | N1 | !   | 1  |
| BOND CL2 | C9 | !   | 1  |
| BOND CL  | C8 | !   | 1  |
| BOND N1  | H2 | !   | 1  |
| BOND N1  | C1 | !   | 1  |
| BOND C9  | C8 | !   | 1  |
| BOND C9  | C5 | !   | 2  |
| BOND C8  | C3 | !   | 2  |
| BOND C1  | N2 | !   | 2  |
| BOND C1  | C4 | !   | 1  |
| BOND N2  | C2 | !   | 1  |
| BOND H4  | N3 | !   | 1  |
| BOND H5  | C5 | !   | 1  |
| BOND C5  | C6 | !   | 1  |
| BOND C3  | C4 | !   | 1  |
| BOND C3  | C7 | !   | 1  |
| BOND C4  | N5 | !   | 2  |
| BOND C2  | N3 | !   | 1  |
| BOND C2  | N4 | !   | 2  |
| BOND N3  | H3 | !   | 1  |
| BOND C6  | C7 | !   | 2  |
| BOND C6  | H6 | !   | 1  |
| BOND C7  | H7 | !   | 1  |
| BOND N5  | N4 | !   | 1  |
| IMPR C1  | C4 | N 2 | N1 |
| IMPR N1  | H1 | H 2 | C1 |

|         |    |     |    |
|---------|----|-----|----|
| IMPR C2 | N2 | N 4 | N3 |
| IMPR N3 | H3 | H 4 | C2 |

END

# Parameters

BONDS

|        |        |         |       |   |
|--------|--------|---------|-------|---|
| CG2R61 | CG2R61 | 390.348 | 1.375 | ! |
| CG2R61 | CG2R67 | 384.918 | 1.402 | ! |
| CG2R61 | CLGR1  | 273.039 | 1.729 | ! |
| CG2R61 | HGR61  | 412.122 | 1.086 | ! |
| CG2R64 | CG2R67 | 442.307 | 1.381 | ! |
| CG2R64 | NG2R62 | 503.979 | 1.330 | ! |
| CG2R64 | NG2S3  | 522.544 | 1.378 | ! |
| CG2R67 | CG2R67 | 431.369 | 1.476 | ! |
| CG2R67 | NG2R62 | 425.802 | 1.319 | ! |
| NG2R62 | NG2R62 | 466.829 | 1.317 | ! |
| NG2S3  | HGP4   | 523.145 | 1.018 | ! |

ANGLES

|        |        |        |         |         |       |          |   |
|--------|--------|--------|---------|---------|-------|----------|---|
| CG2R61 | CG2R61 | CG2R61 | 70.714  | 120.206 | 35.00 | 2.416 20 | ! |
| CG2R61 | CG2R61 | CG2R67 | 287.027 | 120.418 |       |          | ! |
| CG2R61 | CG2R61 | CLGR1  | 134.935 | 119.945 |       |          | ! |
| CG2R61 | CG2R61 | HGR61  | 103.957 | 120.342 | 22.00 | 2.152 50 | ! |
| CG2R67 | CG2R61 | CLGR1  | 135.126 | 119.611 |       |          | ! |
| CG2R67 | CG2R61 | HGR61  | 209.832 | 118.452 |       |          | ! |
| CG2R67 | CG2R64 | NG2R62 | 262.195 | 120.240 |       |          | ! |
| CG2R67 | CG2R64 | NG2S3  | 231.259 | 122.622 |       |          | ! |
| NG2R62 | CG2R64 | NG2R62 | 152.933 | 127.074 |       |          | ! |
| NG2R62 | CG2R64 | NG2S3  | 208.081 | 117.665 |       |          | ! |
| CG2R61 | CG2R67 | CG2R61 | 124.657 | 119.795 |       |          | ! |
| CG2R61 | CG2R67 | CG2R67 | 183.221 | 119.966 |       |          | ! |
| CG2R64 | CG2R67 | CG2R67 | 246.276 | 122.587 |       |          | ! |
| CG2R64 | CG2R67 | NG2R62 | 154.711 | 120.273 |       |          | ! |
| CG2R67 | CG2R67 | NG2R62 | 204.104 | 115.578 |       |          | ! |
| CG2R64 | NG2R62 | CG2R64 | 146.416 | 115.041 |       |          | ! |
| CG2R64 | NG2R62 | NG2R62 | 145.406 | 117.331 |       |          | ! |
| CG2R67 | NG2R62 | NG2R62 | 259.817 | 117.180 |       |          | ! |
| CG2R64 | NG2S3  | HGP4   | 102.772 | 116.945 |       |          | ! |
| HGP4   | NG2S3  | HGP4   | 87.737  | 118.061 |       |          | ! |

DIHEDRALS

|        |        |        |        |        |   |        |   |
|--------|--------|--------|--------|--------|---|--------|---|
| CG2R61 | CG2R61 | CG2R61 | CG2R61 | 2.8300 | 2 | 180.00 | ! |
| CG2R61 | CG2R61 | CG2R61 | CG2R67 | 2.8300 | 2 | 180.00 | ! |
| CG2R61 | CG2R61 | CG2R61 | CLGR1  | 3.0000 | 2 | 180.00 | ! |
| CG2R61 | CG2R61 | CG2R61 | CLGR1  | 2.8580 | 3 | 0.00   | ! |
| CG2R61 | CG2R61 | CG2R61 | CLGR1  | 0.5300 | 6 | 0.00   | ! |
| CG2R61 | CG2R61 | CG2R61 | HGR61  | 1.9720 | 2 | 180.00 | ! |
| CG2R67 | CG2R61 | CG2R61 | CLGR1  | 2.8860 | 3 | 0.00   | ! |
| CG2R67 | CG2R61 | CG2R61 | HGR61  | 2.9940 | 3 | 0.00   | ! |
| CLGR1  | CG2R61 | CG2R61 | CLGR1  | 3.0000 | 3 | 180.00 | ! |
| HGR61  | CG2R61 | CG2R61 | HGR61  | 3.0000 | 3 | 180.00 | ! |
| CG2R61 | CG2R61 | CG2R67 | CG2R61 | 2.9680 | 2 | 0.00   | ! |
| CG2R61 | CG2R61 | CG2R67 | CG2R67 | 2.9990 | 3 | 0.00   | ! |
| CLGR1  | CG2R61 | CG2R67 | CG2R61 | 2.6520 | 3 | 180.00 | ! |
| CLGR1  | CG2R61 | CG2R67 | CG2R67 | 3.0000 | 3 | 180.00 | ! |
| HGR61  | CG2R61 | CG2R67 | CG2R61 | 2.8910 | 3 | 0.00   | ! |
| HGR61  | CG2R61 | CG2R67 | CG2R67 | 0.9690 | 2 | 180.00 | ! |
| NG2R62 | CG2R64 | CG2R67 | CG2R67 | 2.9990 | 2 | 180.00 | ! |
| NG2R62 | CG2R64 | CG2R67 | NG2R62 | 1.9720 | 2 | 0.00   | ! |
| NG2S3  | CG2R64 | CG2R67 | CG2R67 | 3.0000 | 3 | 180.00 | ! |
| NG2S3  | CG2R64 | CG2R67 | CG2R67 | 0.7370 | 4 | 180.00 | ! |
| NG2S3  | CG2R64 | CG2R67 | NG2R62 | 3.0000 | 2 | 180.00 | ! |
| CG2R67 | CG2R64 | NG2R62 | CG2R64 | 2.3000 | 3 | 180.00 | ! |

|        |        |        |        |        |   |        |   |
|--------|--------|--------|--------|--------|---|--------|---|
| NG2R62 | CG2R64 | NG2R62 | CG2R64 | 3.0000 | 3 | 180.00 | ! |
| NG2R62 | CG2R64 | NG2R62 | NG2R62 | 3.0000 | 2 | 180.00 | ! |
| NG2S3  | CG2R64 | NG2R62 | CG2R64 | 2.9990 | 2 | 180.00 | ! |
| NG2S3  | CG2R64 | NG2R62 | NG2R62 | 1.8400 | 2 | 180.00 | ! |
| CG2R67 | CG2R64 | NG2S3  | HGP4   | 0.1070 | 2 | 180.00 | ! |
| NG2R62 | CG2R64 | NG2S3  | HGP4   | 0.2750 | 2 | 180.00 | ! |
| G2R61  | CG2R67 | CG2R67 | CG2R64 | 3.0000 | 1 | 180.00 | ! |
| CG2R61 | CG2R67 | CG2R67 | CG2R64 | 1.1770 | 2 | 180.00 | ! |
| CG2R61 | CG2R67 | CG2R67 | CG2R64 | 3.0000 | 3 | 180.00 | ! |
| CG2R61 | CG2R67 | CG2R67 | NG2R62 | 2.9930 | 1 | 0.00   | ! |
| CG2R61 | CG2R67 | CG2R67 | NG2R62 | 0.9920 | 2 | 180.00 | ! |
| CG2R61 | CG2R67 | CG2R67 | NG2R62 | 2.9990 | 3 | 0.00   | ! |
| CG2R64 | CG2R67 | NG2R62 | NG2R62 | 3.0000 | 3 | 180.00 | ! |
| CG2R67 | CG2R67 | NG2R62 | NG2R62 | 3.0000 | 2 | 180.00 | ! |
| CG2R64 | NG2R62 | NG2R62 | CG2R67 | 2.8410 | 3 | 180.00 | ! |
| HGR61  | CG2R61 | CG2R61 | CLGR1  | 2.7230 | 3 | 180.00 | ! |

IMPROPERS

|        |        |        |        |         |   |      |   |
|--------|--------|--------|--------|---------|---|------|---|
| CG2R64 | CG2R67 | NG2R62 | NG2S3  | 60.0000 | 0 | 0.00 | ! |
| CG2R64 | NG2R62 | NG2R62 | NG2S3  | 40.0000 | 0 | 0.00 | ! |
| NG2S3  | HGP4   | HGP4   | CG2R64 | 9.0000  | 0 | 0.00 | ! |

END

RETURN
